# Supplementary material for: Integrative Multi-omics Module Network Inference with Lemon-Tree
Source: PLoS Comput Biol. 2015 Feb 13;11(2):e1003983. doi: 10.1371/journal.pcbi.1003983 (PMC4332478; doi:10.1371/journal.pcbi.1003983)
Supplement: S4 Table — (XLS) [file pcbi.1003983.s004.xls]

## Sheet: Sheet1
Table S4:	GO enrichment for glioblastoma clusters (corrected p-value < 0.05).
# Namespace: biological_process
# Statistical test: Overrepresentation
# Correction method: Benjamini & Hochberg False Discovery Rate (FDR) correction
# Significance level: 0.05
#
# prop_clust: proportion of genes having the GO category in the cluster
# prop_ref: proportion of genes having the GO category in the reference set
#
# odds-ratio: prop_clust / prop_ref
#
# cluster_id GO_code prop_clust prop_ref odds-ratio p-value corrected_p-value go_category
Cluster_id	GO_code	Prop_clust	Prop_ref	Odds_ratio	Raw_p-value	Corrected_p-value	GO_category_name
0	GO:0090304	55/94	3412/13778	2.36	3.10E-12	2.33E-9	nucleic acid metabolic process
0	GO:0006139	61/94	4147/13778	2.16	3.04E-12	2.33E-9	nucleobase-containing compound metabolic process
0	GO:0016070	49/94	2849/13778	2.52	1.37E-11	5.31E-9	RNA metabolic process
0	GO:0046483	61/94	4293/13778	2.08	1.56E-11	5.31E-9	heterocycle metabolic process
0	GO:0006725	61/94	4304/13778	2.08	1.76E-11	5.31E-9	cellular aromatic compound metabolic process
0	GO:0006351	42/94	2156/13778	2.86	2.12E-11	5.34E-9	transcription, DNA-dependent
0	GO:0032774	42/94	2241/13778	2.75	7.57E-11	1.63E-8	RNA biosynthetic process
0	GO:1901360	61/94	4488/13778	1.99	1.23E-10	2.06E-8	organic cyclic compound metabolic process
0	GO:0010467	52/94	3361/13778	2.27	1.19E-10	2.06E-8	gene expression
0	GO:0034641	61/94	4508/13778	1.98	1.51E-10	2.27E-8	cellular nitrogen compound metabolic process
0	GO:0034654	43/94	2458/13778	2.56	3.74E-10	5.13E-8	nucleobase-containing compound biosynthetic process
0	GO:0051252	47/94	2952/13778	2.33	8.10E-10	9.39E-8	regulation of RNA metabolic process
0	GO:0019438	43/94	2514/13778	2.51	7.78E-10	9.39E-8	aromatic compound biosynthetic process
0	GO:0010468	50/94	3308/13778	2.22	9.38E-10	9.43E-8	regulation of gene expression
0	GO:0018130	43/94	2524/13778	2.50	8.85E-10	9.43E-8	heterocycle biosynthetic process
0	GO:0044271	43/94	2589/13778	2.43	2.00E-9	1.89E-7	cellular nitrogen compound biosynthetic process
0	GO:1901362	43/94	2617/13778	2.41	2.82E-9	2.50E-7	organic cyclic compound biosynthetic process
0	GO:0010556	48/94	3194/13778	2.20	3.48E-9	2.92E-7	regulation of macromolecule biosynthetic process
0	GO:0034645	46/94	2973/13778	2.27	3.79E-9	3.01E-7	cellular macromolecule biosynthetic process
0	GO:2000112	47/94	3099/13778	2.22	4.35E-9	3.28E-7	regulation of cellular macromolecule biosynthetic process
0	GO:0006807	61/94	4871/13778	1.84	4.87E-9	3.50E-7	nitrogen compound metabolic process
0	GO:2001141	45/94	2896/13778	2.28	5.66E-9	3.88E-7	regulation of RNA biosynthetic process
0	GO:0019219	50/94	3481/13778	2.11	6.02E-9	3.94E-7	regulation of nucleobase-containing compound metabolic process
0	GO:0009059	46/94	3020/13778	2.23	6.41E-9	4.03E-7	macromolecule biosynthetic process
0	GO:0006355	44/94	2857/13778	2.26	1.28E-8	7.43E-7	regulation of transcription, DNA-dependent
0	GO:0031323	57/94	4439/13778	1.88	1.27E-8	7.43E-7	regulation of cellular metabolic process
0	GO:0051171	50/94	3563/13778	2.06	1.38E-8	7.44E-7	regulation of nitrogen compound metabolic process
0	GO:0031326	48/94	3321/13778	2.12	1.34E-8	7.44E-7	regulation of cellular biosynthetic process
0	GO:0044260	65/94	5573/13778	1.71	1.57E-8	8.18E-7	cellular macromolecule metabolic process
0	GO:0009889	48/94	3348/13778	2.10	1.77E-8	8.89E-7	regulation of biosynthetic process
0	GO:0019222	61/94	5068/13778	1.76	2.72E-8	1.32E-6	regulation of metabolic process
0	GO:0043170	67/94	6078/13778	1.62	8.29E-8	3.81E-6	macromolecule metabolic process
0	GO:0060255	53/94	4129/13778	1.88	8.35E-8	3.81E-6	regulation of macromolecule metabolic process
0	GO:0016568	15/94	414/13778	5.31	1.21E-7	5.38E-6	chromatin modification
0	GO:0080090	54/94	4378/13778	1.81	2.32E-7	9.97E-6	regulation of primary metabolic process
0	GO:0006913	10/94	205/13778	7.15	1.30E-6	5.45E-5	nucleocytoplasmic transport
0	GO:0051169	10/94	208/13778	7.05	1.49E-6	6.05E-5	nuclear transport
0	GO:0040029	8/94	121/13778	9.69	1.66E-6	6.47E-5	regulation of gene expression, epigenetic
0	GO:0006325	15/94	509/13778	4.32	1.67E-6	6.47E-5	chromatin organization
0	GO:0044249	47/94	3740/13778	1.84	1.93E-6	7.26E-5	cellular biosynthetic process
0	GO:1901576	47/94	3808/13778	1.81	3.33E-6	1.22E-4	organic substance biosynthetic process
0	GO:0009058	47/94	3867/13778	1.78	5.26E-6	1.89E-4	biosynthetic process
0	GO:0006366	15/94	618/13778	3.56	1.75E-5	6.12E-4	transcription from RNA polymerase II promoter
0	GO:0051253	17/94	819/13778	3.04	3.40E-5	1.17E-3	negative regulation of RNA metabolic process
0	GO:0045893	19/94	1002/13778	2.78	3.83E-5	1.25E-3	positive regulation of transcription, DNA-dependent
0	GO:0051168	6/94	92/13778	9.56	3.82E-5	1.25E-3	nuclear export
0	GO:0051649	22/94	1291/13778	2.50	4.31E-5	1.38E-3	establishment of localization in cell
0	GO:0051276	15/94	671/13778	3.28	4.54E-5	1.42E-3	chromosome organization
0	GO:0046907	18/94	932/13778	2.83	5.00E-5	1.54E-3	intracellular transport
0	GO:0051254	19/94	1049/13778	2.65	7.13E-5	2.11E-3	positive regulation of RNA metabolic process
0	GO:0006357	21/94	1236/13778	2.49	6.99E-5	2.11E-3	regulation of transcription from RNA polymerase II promoter
0	GO:0010557	20/94	1174/13778	2.50	1.04E-4	3.02E-3	positive regulation of macromolecule biosynthetic process
0	GO:0045934	17/94	898/13778	2.77	1.07E-4	3.04E-3	negative regulation of nucleobase-containing compound metabolic process
0	GO:0010628	19/94	1085/13778	2.57	1.12E-4	3.12E-3	positive regulation of gene expression
0	GO:0051172	17/94	909/13778	2.74	1.24E-4	3.40E-3	negative regulation of nitrogen compound metabolic process
0	GO:0044237	69/94	7521/13778	1.34	1.30E-4	3.49E-3	cellular metabolic process
0	GO:0051641	23/94	1514/13778	2.23	1.63E-4	4.23E-3	cellular localization
0	GO:0019048	10/94	358/13778	4.09	1.61E-4	4.23E-3	virus-host interaction
0	GO:0050789	73/94	8226/13778	1.30	1.75E-4	4.45E-3	regulation of biological process
0	GO:0044238	69/94	7579/13778	1.33	1.77E-4	4.45E-3	primary metabolic process
0	GO:0071704	70/94	7769/13778	1.32	2.07E-4	5.12E-3	organic substance metabolic process
0	GO:0050794	70/94	7778/13778	1.32	2.17E-4	5.29E-3	regulation of cellular process
0	GO:0010629	16/94	870/13778	2.70	2.44E-4	5.83E-3	negative regulation of gene expression
0	GO:0031328	20/94	1253/13778	2.34	2.51E-4	5.91E-3	positive regulation of cellular biosynthetic process
0	GO:0045892	15/94	789/13778	2.79	2.74E-4	6.35E-3	negative regulation of transcription, DNA-dependent
0	GO:0009891	20/94	1274/13778	2.30	3.13E-4	6.93E-3	positive regulation of biosynthetic process
0	GO:2000113	16/94	889/13778	2.64	3.11E-4	6.93E-3	negative regulation of cellular macromolecule biosynthetic process
0	GO:0045935	19/94	1173/13778	2.37	3.07E-4	6.93E-3	positive regulation of nucleobase-containing compound metabolic process
0	GO:0051173	19/94	1199/13778	2.32	4.04E-4	8.70E-3	positive regulation of nitrogen compound metabolic process
0	GO:0051701	10/94	401/13778	3.66	3.99E-4	8.70E-3	interaction with host
0	GO:0031324	20/94	1312/13778	2.23	4.59E-4	9.74E-3	negative regulation of cellular metabolic process
0	GO:0010558	16/94	927/13778	2.53	4.95E-4	1.02E-2	negative regulation of macromolecule biosynthetic process
0	GO:0010605	20/94	1320/13778	2.22	4.96E-4	1.02E-2	negative regulation of macromolecule metabolic process
0	GO:0006259	14/94	757/13778	2.71	5.88E-4	1.19E-2	DNA metabolic process
0	GO:0006406	4/94	57/13778	10.29	6.09E-4	1.19E-2	mRNA export from nucleus
0	GO:0044403	10/94	423/13778	3.47	6.06E-4	1.19E-2	symbiosis, encompassing mutualism through parasitism
0	GO:0044419	10/94	423/13778	3.47	6.06E-4	1.19E-2	interspecies interaction between organisms
0	GO:0051028	5/94	101/13778	7.26	6.28E-4	1.21E-2	mRNA transport
0	GO:0016973	2/94	6/13778	48.86	6.79E-4	1.29E-2	poly(A)+ mRNA export from nucleus
0	GO:0065007	74/94	8661/13778	1.25	6.88E-4	1.30E-2	biological regulation
0	GO:0035162	3/94	26/13778	16.91	7.14E-4	1.33E-2	embryonic hemopoiesis
0	GO:0008380	8/94	286/13778	4.10	7.43E-4	1.37E-2	RNA splicing
0	GO:0031327	16/94	966/13778	2.43	7.74E-4	1.41E-2	negative regulation of cellular biosynthetic process
0	GO:0006891	3/94	27/13778	16.29	7.99E-4	1.43E-2	intra-Golgi vesicle-mediated transport
0	GO:0044710	70/94	8050/13778	1.27	8.47E-4	1.50E-2	single-organism metabolic process
0	GO:0006405	4/94	63/13778	9.31	8.90E-4	1.56E-2	RNA export from nucleus
0	GO:0009890	16/94	981/13778	2.39	9.13E-4	1.58E-2	negative regulation of biosynthetic process
0	GO:0022415	10/94	450/13778	3.26	9.74E-4	1.67E-2	viral reproductive process
0	GO:0006304	4/94	65/13778	9.02	1.00E-3	1.69E-2	DNA modification
0	GO:0016032	12/94	624/13778	2.82	1.07E-3	1.79E-2	viral reproduction
0	GO:0009892	20/94	1408/13778	2.08	1.12E-3	1.86E-2	negative regulation of metabolic process
0	GO:0050658	5/94	116/13778	6.32	1.17E-3	1.86E-2	RNA transport
0	GO:0050657	5/94	116/13778	6.32	1.17E-3	1.86E-2	nucleic acid transport
0	GO:0051236	5/94	116/13778	6.32	1.17E-3	1.86E-2	establishment of RNA localization
0	GO:0051704	44/94	4316/13778	1.49	1.16E-3	1.86E-2	multi-organism process
0	GO:0044380	2/94	8/13778	36.64	1.26E-3	1.97E-2	protein localization to cytoskeleton
0	GO:0048523	31/94	2700/13778	1.68	1.47E-3	2.29E-2	negative regulation of cellular process
0	GO:0030518	4/94	73/13778	8.03	1.54E-3	2.37E-2	intracellular steroid hormone receptor signaling pathway
0	GO:0006403	5/94	124/13778	5.91	1.58E-3	2.40E-2	RNA localization
0	GO:0016570	7/94	250/13778	4.10	1.59E-3	2.40E-2	histone modification
0	GO:0016569	7/94	253/13778	4.06	1.71E-3	2.51E-2	covalent chromatin modification
0	GO:0006306	3/94	35/13778	12.56	1.72E-3	2.51E-2	DNA methylation
0	GO:0006305	3/94	35/13778	12.56	1.72E-3	2.51E-2	DNA alkylation
0	GO:0021591	2/94	10/13778	29.31	2.00E-3	2.87E-2	ventricular system development
0	GO:0048025	2/94	10/13778	29.31	2.00E-3	2.87E-2	negative regulation of mRNA splicing, via spliceosome
0	GO:0008152	72/94	8568/13778	1.23	2.08E-3	2.95E-2	metabolic process
0	GO:0009790	14/94	865/13778	2.37	2.11E-3	2.98E-2	embryo development
0	GO:0050686	2/94	11/13778	26.65	2.43E-3	3.40E-2	negative regulation of mRNA processing
0	GO:0043414	5/94	142/13778	5.16	2.85E-3	3.91E-2	macromolecule methylation
0	GO:0015931	5/94	142/13778	5.16	2.85E-3	3.91E-2	nucleobase-containing compound transport
0	GO:0006996	23/94	1861/13778	1.81	2.91E-3	3.95E-2	organelle organization
0	GO:0006397	8/94	359/13778	3.27	3.12E-3	4.20E-2	mRNA processing
0	GO:0044703	11/94	623/13778	2.59	3.38E-3	4.47E-2	multi-organism reproductive process
0	GO:0031325	23/94	1882/13778	1.79	3.36E-3	4.47E-2	positive regulation of cellular metabolic process
0	GO:0016573	4/94	91/13778	6.44	3.45E-3	4.53E-2	histone acetylation
0	GO:0044744	4/94	92/13778	6.37	3.59E-3	4.59E-2	protein targeting to nucleus
0	GO:0006606	4/94	92/13778	6.37	3.59E-3	4.59E-2	protein import into nucleus
0	GO:0030521	3/94	45/13778	9.77	3.55E-3	4.59E-2	androgen receptor signaling pathway
0	GO:0018393	4/94	93/13778	6.30	3.73E-3	4.73E-2	internal peptidyl-lysine acetylation
0	GO:0045815	2/94	14/13778	20.94	3.97E-3	4.94E-2	positive regulation of gene expression, epigenetic
0	GO:0006349	2/94	14/13778	20.94	3.97E-3	4.94E-2	regulation of gene expression by genetic imprinting
0	GO:0051170	4/94	95/13778	6.17	4.03E-3	4.94E-2	nuclear import
0	GO:0018394	4/94	95/13778	6.17	4.03E-3	4.94E-2	peptidyl-lysine acetylation
1	GO:0022403	68/83	710/13778	15.90	6.76E-74	9.14E-71	cell cycle phase
1	GO:0022402	69/83	851/13778	13.46	2.99E-70	2.02E-67	cell cycle process
1	GO:0000278	62/83	641/13778	16.06	1.36E-65	6.13E-63	mitotic cell cycle
1	GO:0000279	56/83	447/13778	20.80	3.04E-64	1.03E-61	M phase
1	GO:0007049	70/83	1115/13778	10.42	9.20E-64	2.49E-61	cell cycle
1	GO:0000087	46/83	313/13778	24.40	2.10E-54	4.72E-52	M phase of mitotic cell cycle
1	GO:0007067	45/83	307/13778	24.33	5.06E-53	8.54E-51	mitosis
1	GO:0000280	45/83	307/13778	24.33	5.06E-53	8.54E-51	nuclear division
1	GO:0048285	45/83	329/13778	22.71	1.36E-51	2.04E-49	organelle fission
1	GO:0051301	42/83	402/13778	17.34	1.14E-42	1.54E-40	cell division
1	GO:0007017	35/83	356/13778	16.32	5.08E-34	6.24E-32	microtubule-based process
1	GO:0006996	58/83	1861/13778	5.17	5.84E-32	6.58E-30	organelle organization
1	GO:0010564	33/83	425/13778	12.89	1.48E-28	1.54E-26	regulation of cell cycle process
1	GO:0000226	27/83	231/13778	19.40	5.50E-28	5.31E-26	microtubule cytoskeleton organization
1	GO:0000236	20/83	85/13778	39.06	3.51E-27	3.16E-25	mitotic prometaphase
1	GO:0007059	22/83	126/13778	28.98	9.01E-27	7.47E-25	chromosome segregation
1	GO:0051726	38/83	732/13778	8.62	9.39E-27	7.47E-25	regulation of cell cycle
1	GO:0007051	17/83	72/13778	39.19	3.33E-23	2.50E-21	spindle organization
1	GO:0000819	15/83	50/13778	49.80	2.51E-22	1.78E-20	sister chromatid segregation
1	GO:0000070	14/83	47/13778	49.45	7.64E-21	5.16E-19	mitotic sister chromatid segregation
1	GO:0016043	62/83	3539/13778	2.91	1.00E-20	6.44E-19	cellular component organization
1	GO:0071840	62/83	3650/13778	2.82	5.52E-20	3.39E-18	cellular component organization or biogenesis
1	GO:0071156	22/83	260/13778	14.05	1.19E-19	6.98E-18	regulation of cell cycle arrest
1	GO:0007346	23/83	311/13778	12.28	3.26E-19	1.76E-17	regulation of mitotic cell cycle
1	GO:0000075	21/83	236/13778	14.77	3.17E-19	1.76E-17	cell cycle checkpoint
1	GO:0051329	23/83	331/13778	11.53	1.32E-18	6.86E-17	interphase of mitotic cell cycle
1	GO:0006259	31/83	757/13778	6.80	1.86E-18	9.31E-17	DNA metabolic process
1	GO:0051325	23/83	343/13778	11.13	2.93E-18	1.41E-16	interphase
1	GO:0051704	64/83	4316/13778	2.46	1.00E-17	4.66E-16	multi-organism process
1	GO:0051276	28/83	671/13778	6.93	8.30E-17	3.74E-15	chromosome organization
1	GO:0007088	14/83	91/13778	25.54	1.94E-16	7.96E-15	regulation of mitosis
1	GO:0007010	27/83	632/13778	7.09	1.91E-16	7.96E-15	cytoskeleton organization
1	GO:0051783	14/83	91/13778	25.54	1.94E-16	7.96E-15	regulation of nuclear division
1	GO:0051983	9/83	23/13778	64.96	5.10E-15	2.03E-13	regulation of chromosome segregation
1	GO:0030071	10/83	38/13778	43.68	1.48E-14	5.72E-13	regulation of mitotic metaphase/anaphase transition
1	GO:0031577	9/83	33/13778	45.27	2.29E-13	8.61E-12	spindle checkpoint
1	GO:0007093	13/83	134/13778	16.10	1.14E-12	4.18E-11	mitotic cell cycle checkpoint
1	GO:0000910	11/83	82/13778	22.27	1.90E-12	6.74E-11	cytokinesis
1	GO:0033043	20/83	471/13778	7.05	3.55E-12	1.23E-10	regulation of organelle organization
1	GO:0007052	8/83	29/13778	45.79	4.76E-12	1.61E-10	mitotic spindle organization
1	GO:0071174	8/83	31/13778	42.84	8.66E-12	2.85E-10	mitotic cell cycle spindle checkpoint
1	GO:0006260	14/83	197/13778	11.80	1.05E-11	3.36E-10	DNA replication
1	GO:0000086	12/83	128/13778	15.56	1.36E-11	4.26E-10	G2/M transition of mitotic cell cycle
1	GO:0090068	13/83	163/13778	13.24	1.42E-11	4.36E-10	positive regulation of cell cycle process
1	GO:0031145	10/83	80/13778	20.75	4.22E-11	1.27E-9	anaphase-promoting complex-dependent proteasomal ubiquitin-dependent protein catabolic process
1	GO:0045839	8/83	38/13778	34.95	5.19E-11	1.49E-9	negative regulation of mitosis
1	GO:0051784	8/83	38/13778	34.95	5.19E-11	1.49E-9	negative regulation of nuclear division
1	GO:0007018	12/83	148/13778	13.46	7.58E-11	2.13E-9	microtubule-based movement
1	GO:0051988	5/83	7/13778	118.57	1.46E-10	4.03E-9	regulation of attachment of spindle microtubules to kinetochore
1	GO:0032886	10/83	92/13778	18.04	1.74E-10	4.71E-9	regulation of microtubule-based process
1	GO:0007094	7/83	28/13778	41.50	2.38E-10	6.30E-9	mitotic cell cycle spindle assembly checkpoint
1	GO:0010948	10/83	97/13778	17.11	2.97E-10	7.71E-9	negative regulation of cell cycle process
1	GO:0051640	12/83	167/13778	11.93	3.11E-10	7.81E-9	organelle localization
1	GO:0071173	7/83	29/13778	40.07	3.12E-10	7.81E-9	spindle assembly checkpoint
1	GO:0045841	7/83	30/13778	38.73	4.05E-10	9.95E-9	negative regulation of mitotic metaphase/anaphase transition
1	GO:0070507	9/83	77/13778	19.40	7.75E-10	1.87E-8	regulation of microtubule cytoskeleton organization
1	GO:0051656	10/83	116/13778	14.31	1.75E-9	4.16E-8	establishment of organelle localization
1	GO:0050000	6/83	22/13778	45.27	2.75E-9	6.29E-8	chromosome localization
1	GO:0051303	6/83	22/13778	45.27	2.75E-9	6.29E-8	establishment of chromosome localization
1	GO:0007126	10/83	125/13778	13.28	3.65E-9	8.09E-8	meiosis
1	GO:0051327	10/83	125/13778	13.28	3.65E-9	8.09E-8	M phase of meiotic cell cycle
1	GO:0051321	10/83	129/13778	12.87	4.97E-9	1.08E-7	meiotic cell cycle
1	GO:0048015	9/83	96/13778	15.56	5.68E-9	1.20E-7	phosphatidylinositol-mediated signaling
1	GO:0048017	9/83	96/13778	15.56	5.68E-9	1.20E-7	inositol lipid-mediated signaling
1	GO:0006974	17/83	559/13778	5.05	2.90E-8	6.03E-7	response to DNA damage stimulus
1	GO:0006281	14/83	368/13778	6.32	3.66E-8	7.48E-7	DNA repair
1	GO:0008283	17/83	569/13778	4.96	3.76E-8	7.57E-7	cell proliferation
1	GO:0045786	12/83	256/13778	7.78	3.94E-8	7.82E-7	negative regulation of cell cycle
1	GO:0010639	10/83	163/13778	10.18	4.72E-8	9.23E-7	negative regulation of organelle organization
1	GO:0070925	8/83	88/13778	15.09	5.35E-8	1.02E-6	organelle assembly
1	GO:0019886	8/83	88/13778	15.09	5.35E-8	1.02E-6	antigen processing and presentation of exogenous peptide antigen via MHC class II
1	GO:0002495	8/83	90/13778	14.76	6.39E-8	1.20E-6	antigen processing and presentation of peptide antigen via MHC class II
1	GO:0002504	8/83	91/13778	14.59	6.97E-8	1.29E-6	antigen processing and presentation of peptide or polysaccharide antigen via MHC class II
1	GO:0043161	10/83	171/13778	9.71	7.42E-8	1.36E-6	proteasomal ubiquitin-dependent protein catabolic process
1	GO:0010498	10/83	173/13778	9.60	8.28E-8	1.49E-6	proteasomal protein catabolic process
1	GO:0034508	6/83	38/13778	26.21	9.42E-8	1.67E-6	centromere complex assembly
1	GO:0031576	6/83	39/13778	25.54	1.11E-7	1.94E-6	G2/M transition checkpoint
1	GO:0033205	5/83	22/13778	37.73	1.71E-7	2.96E-6	cell cycle cytokinesis
1	GO:0045787	8/83	110/13778	12.07	3.06E-7	5.24E-6	positive regulation of cell cycle
1	GO:0034502	5/83	25/13778	33.20	3.39E-7	5.73E-6	protein localization to chromosome
1	GO:0051439	7/83	78/13778	14.90	4.17E-7	6.95E-6	regulation of ubiquitin-protein ligase activity involved in mitotic cell cycle
1	GO:0051297	6/83	49/13778	20.33	4.52E-7	7.45E-6	centrosome organization
1	GO:0006323	9/83	160/13778	9.34	4.84E-7	7.87E-6	DNA packaging
1	GO:0071103	10/83	215/13778	7.72	6.26E-7	1.01E-5	DNA conformation change
1	GO:0031023	6/83	54/13778	18.44	8.16E-7	1.30E-5	microtubule organizing center organization
1	GO:0030261	5/83	31/13778	26.77	1.06E-6	1.62E-5	chromosome condensation
1	GO:0031572	5/83	31/13778	26.77	1.06E-6	1.62E-5	G2/M transition DNA damage checkpoint
1	GO:0010389	5/83	31/13778	26.77	1.06E-6	1.62E-5	regulation of G2/M transition of mitotic cell cycle
1	GO:0071777	4/83	14/13778	47.43	1.17E-6	1.74E-5	positive regulation of cell cycle cytokinesis
1	GO:0071775	4/83	14/13778	47.43	1.17E-6	1.74E-5	regulation of cell cycle cytokinesis
1	GO:0090307	4/83	14/13778	47.43	1.17E-6	1.74E-5	spindle assembly involved in mitosis
1	GO:0051128	22/83	1198/13778	3.05	1.50E-6	2.20E-5	regulation of cellular component organization
1	GO:0040001	4/83	15/13778	44.27	1.59E-6	2.31E-5	establishment of mitotic spindle localization
1	GO:0051438	7/83	96/13778	12.10	1.72E-6	2.48E-5	regulation of ubiquitin-protein ligase activity
1	GO:0032467	4/83	16/13778	41.50	2.11E-6	2.97E-5	positive regulation of cytokinesis
1	GO:0051256	3/83	5/13778	99.60	2.09E-6	2.97E-5	spindle midzone assembly involved in mitosis
1	GO:0045840	5/83	36/13778	23.06	2.29E-6	3.12E-5	positive regulation of mitosis
1	GO:0051785	5/83	36/13778	23.06	2.29E-6	3.12E-5	positive regulation of nuclear division
1	GO:0051340	7/83	100/13778	11.62	2.27E-6	3.12E-5	regulation of ligase activity
1	GO:0033554	20/83	1042/13778	3.19	2.59E-6	3.50E-5	cellular response to stress
1	GO:0051225	5/83	38/13778	21.84	3.02E-6	4.03E-5	spindle assembly
1	GO:0006511	11/83	318/13778	5.74	3.06E-6	4.05E-5	ubiquitin-dependent protein catabolic process
1	GO:0043900	23/83	1355/13778	2.82	3.14E-6	4.11E-5	regulation of multi-organism process
1	GO:0051310	4/83	18/13778	36.89	3.51E-6	4.56E-5	metaphase plate congression
1	GO:0019941	11/83	324/13778	5.64	3.66E-6	4.71E-5	modification-dependent protein catabolic process
1	GO:0043632	11/83	327/13778	5.58	4.00E-6	5.10E-5	modification-dependent macromolecule catabolic process
1	GO:0051255	3/83	6/13778	83.00	4.16E-6	5.25E-5	spindle midzone assembly
1	GO:0007127	6/83	72/13778	13.83	4.53E-6	5.66E-5	meiosis I
1	GO:0021700	11/83	336/13778	5.43	5.19E-6	6.43E-5	developmental maturation
1	GO:0051293	4/83	20/13778	33.20	5.51E-6	6.71E-5	establishment of spindle localization
1	GO:0046605	4/83	20/13778	33.20	5.51E-6	6.71E-5	regulation of centrosome cycle
1	GO:0051603	11/83	339/13778	5.39	5.65E-6	6.81E-5	proteolysis involved in cellular protein catabolic process
1	GO:0002478	8/83	162/13778	8.20	5.74E-6	6.86E-5	antigen processing and presentation of exogenous peptide antigen
1	GO:0019884	8/83	164/13778	8.10	6.28E-6	7.44E-5	antigen processing and presentation of exogenous antigen
1	GO:0000082	8/83	166/13778	8.00	6.87E-6	8.07E-5	G1/S transition of mitotic cell cycle
1	GO:0045842	3/83	7/13778	71.14	7.25E-6	8.44E-5	positive regulation of mitotic metaphase/anaphase transition
1	GO:0044257	11/83	353/13778	5.17	8.29E-6	9.57E-5	cellular protein catabolic process
1	GO:0031396	8/83	171/13778	7.77	8.54E-6	9.78E-5	regulation of protein ubiquitination
1	GO:0042638	8/83	174/13778	7.63	9.70E-6	1.10E-4	exogen
1	GO:0048610	12/83	432/13778	4.61	9.99E-6	1.11E-4	cellular process involved in reproduction
1	GO:0051653	4/83	23/13778	28.87	9.94E-6	1.11E-4	spindle localization
1	GO:0000083	4/83	23/13778	28.87	9.94E-6	1.11E-4	regulation of transcription involved in G1/S phase of mitotic cell cycle
1	GO:0048002	8/83	176/13778	7.55	1.05E-5	1.16E-4	antigen processing and presentation of peptide antigen
1	GO:0051382	3/83	8/13778	62.25	1.16E-5	1.26E-4	kinetochore assembly
1	GO:0000079	6/83	85/13778	11.72	1.19E-5	1.29E-4	regulation of cyclin-dependent protein kinase activity
1	GO:0043933	18/83	965/13778	3.10	1.35E-5	1.45E-4	macromolecular complex subunit organization
1	GO:0071822	15/83	695/13778	3.58	1.48E-5	1.58E-4	protein complex subunit organization
1	GO:0048820	8/83	186/13778	7.14	1.58E-5	1.67E-4	hair follicle maturation
1	GO:0051488	3/83	9/13778	55.33	1.73E-5	1.78E-4	activation of anaphase-promoting complex activity
1	GO:0051383	3/83	9/13778	55.33	1.73E-5	1.78E-4	kinetochore organization
1	GO:0034501	3/83	9/13778	55.33	1.73E-5	1.78E-4	protein localization to kinetochore
1	GO:0065004	7/83	139/13778	8.36	2.00E-5	2.05E-4	protein-DNA complex assembly
1	GO:0031570	7/83	141/13778	8.24	2.20E-5	2.23E-4	DNA integrity checkpoint
1	GO:0051129	10/83	321/13778	5.17	2.21E-5	2.23E-4	negative regulation of cellular component organization
1	GO:0019882	8/83	197/13778	6.74	2.39E-5	2.39E-4	antigen processing and presentation
1	GO:0000085	3/83	10/13778	49.80	2.45E-5	2.42E-4	G2 phase of mitotic cell cycle
1	GO:0051319	3/83	10/13778	49.80	2.45E-5	2.42E-4	G2 phase
1	GO:0051493	9/83	259/13778	5.77	2.49E-5	2.44E-4	regulation of cytoskeleton organization
1	GO:0030163	11/83	398/13778	4.59	2.54E-5	2.47E-4	protein catabolic process
1	GO:0007098	4/83	29/13778	22.90	2.59E-5	2.50E-4	centrosome cycle
1	GO:0065003	16/83	822/13778	3.23	2.65E-5	2.54E-4	macromolecular complex assembly
1	GO:0032465	4/83	30/13778	22.13	2.98E-5	2.77E-4	regulation of cytokinesis
1	GO:0034724	4/83	30/13778	22.13	2.98E-5	2.77E-4	DNA replication-independent nucleosome organization
1	GO:0034080	4/83	30/13778	22.13	2.98E-5	2.77E-4	CENP-A containing nucleosome assembly at centromere
1	GO:0006336	4/83	30/13778	22.13	2.98E-5	2.77E-4	DNA replication-independent nucleosome assembly
1	GO:0071780	3/83	11/13778	45.27	3.36E-5	3.11E-4	mitotic cell cycle G2/M transition checkpoint
1	GO:0007079	2/83	2/13778	166.00	3.59E-5	3.25E-4	mitotic chromosome movement towards spindle pole
1	GO:0051231	2/83	2/13778	166.00	3.59E-5	3.25E-4	spindle elongation
1	GO:0000022	2/83	2/13778	166.00	3.59E-5	3.25E-4	mitotic spindle elongation
1	GO:0031399	18/83	1038/13778	2.88	3.60E-5	3.25E-4	regulation of protein modification process
1	GO:0031055	4/83	32/13778	20.75	3.87E-5	3.45E-4	chromatin remodeling at centromere
1	GO:0071824	7/83	154/13778	7.55	3.88E-5	3.45E-4	protein-DNA complex subunit organization
1	GO:0034622	11/83	418/13778	4.37	3.98E-5	3.51E-4	cellular macromolecular complex assembly
1	GO:0071695	8/83	212/13778	6.26	4.04E-5	3.54E-4	anatomical structure maturation
1	GO:0043486	4/83	34/13778	19.53	4.95E-5	4.31E-4	histone exchange
1	GO:0006468	15/83	773/13778	3.22	5.10E-5	4.41E-4	protein phosphorylation
1	GO:0006461	13/83	594/13778	3.63	5.13E-5	4.41E-4	protein complex assembly
1	GO:0070271	13/83	597/13778	3.61	5.40E-5	4.62E-4	protein complex biogenesis
1	GO:0007076	3/83	13/13778	38.31	5.77E-5	4.90E-4	mitotic chromosome condensation
1	GO:0043044	4/83	37/13778	17.95	6.95E-5	5.87E-4	ATP-dependent chromatin remodeling
1	GO:0051437	5/83	72/13778	11.53	7.16E-5	6.01E-4	positive regulation of ubiquitin-protein ligase activity involved in mitotic cell cycle
1	GO:0043901	10/83	370/13778	4.49	7.34E-5	6.09E-4	negative regulation of multi-organism process
1	GO:0007080	3/83	14/13778	35.57	7.31E-5	6.09E-4	mitotic metaphase plate congression
1	GO:0044260	51/83	5573/13778	1.52	8.69E-5	7.16E-4	cellular macromolecule metabolic process
1	GO:0051299	2/83	3/13778	110.67	1.07E-4	8.61E-4	centrosome separation
1	GO:0046602	2/83	3/13778	110.67	1.07E-4	8.61E-4	regulation of mitotic centrosome separation
1	GO:0022405	8/83	244/13778	5.44	1.08E-4	8.61E-4	hair cycle process
1	GO:0022404	8/83	244/13778	5.44	1.08E-4	8.61E-4	molting cycle process
1	GO:0051305	2/83	3/13778	110.67	1.07E-4	8.61E-4	chromosome movement towards spindle pole
1	GO:0001942	8/83	244/13778	5.44	1.08E-4	8.61E-4	hair follicle development
1	GO:0031398	6/83	127/13778	7.84	1.15E-4	9.10E-4	positive regulation of protein ubiquitination
1	GO:0042633	8/83	247/13778	5.38	1.18E-4	9.21E-4	hair cycle
1	GO:0042303	8/83	247/13778	5.38	1.18E-4	9.21E-4	molting cycle
1	GO:0009987	82/83	11994/13778	1.13	1.30E-4	1.01E-3	cellular process
1	GO:0051443	5/83	82/13778	10.12	1.33E-4	1.03E-3	positive regulation of ubiquitin-protein ligase activity
1	GO:0000077	6/83	134/13778	7.43	1.55E-4	1.19E-3	DNA damage checkpoint
1	GO:0051302	5/83	85/13778	9.76	1.58E-4	1.21E-3	regulation of cell division
1	GO:0045132	3/83	18/13778	27.67	1.61E-4	1.22E-3	meiotic chromosome segregation
1	GO:0010638	7/83	194/13778	5.99	1.66E-4	1.25E-3	positive regulation of organelle organization
1	GO:0051351	5/83	86/13778	9.65	1.67E-4	1.25E-3	positive regulation of ligase activity
1	GO:0022607	19/83	1281/13778	2.46	1.73E-4	1.29E-3	cellular component assembly
1	GO:0043623	7/83	197/13778	5.90	1.82E-4	1.35E-3	cellular protein complex assembly
1	GO:2000779	3/83	19/13778	26.21	1.91E-4	1.40E-3	regulation of double-strand break repair
1	GO:0016572	3/83	19/13778	26.21	1.91E-4	1.40E-3	histone phosphorylation
1	GO:0031536	2/83	4/13778	83.00	2.13E-4	1.53E-3	positive regulation of exit from mitosis
1	GO:0007019	2/83	4/13778	83.00	2.13E-4	1.53E-3	microtubule depolymerization
1	GO:0051052	7/83	202/13778	5.75	2.12E-4	1.53E-3	regulation of DNA metabolic process
1	GO:0060236	2/83	4/13778	83.00	2.13E-4	1.53E-3	regulation of mitotic spindle organization
1	GO:0006950	30/83	2643/13778	1.88	2.11E-4	1.53E-3	response to stress
1	GO:0043170	53/83	6078/13778	1.45	2.21E-4	1.57E-3	macromolecule metabolic process
1	GO:2000602	6/83	150/13778	6.64	2.85E-4	2.02E-3	regulation of interphase of mitotic cell cycle
1	GO:0061351	4/83	53/13778	12.53	2.86E-4	2.02E-3	neural precursor cell proliferation
1	GO:0006338	5/83	103/13778	8.06	3.87E-4	2.71E-3	chromatin remodeling
1	GO:0016310	16/83	1038/13778	2.56	4.06E-4	2.83E-3	phosphorylation
1	GO:0051781	4/83	60/13778	11.07	4.62E-4	3.20E-3	positive regulation of cell division
1	GO:0090224	2/83	6/13778	55.33	5.29E-4	3.58E-3	regulation of spindle organization
1	GO:0009157	2/83	6/13778	55.33	5.29E-4	3.58E-3	deoxyribonucleoside monophosphate biosynthetic process
1	GO:0051641	20/83	1514/13778	2.19	5.26E-4	3.58E-3	cellular localization
1	GO:0045143	2/83	6/13778	55.33	5.29E-4	3.58E-3	homologous chromosome segregation
1	GO:0000089	2/83	6/13778	55.33	5.29E-4	3.58E-3	mitotic metaphase
1	GO:0032268	18/83	1292/13778	2.31	5.69E-4	3.82E-3	regulation of cellular protein metabolic process
1	GO:0022414	19/83	1411/13778	2.24	5.92E-4	3.96E-3	reproductive process
1	GO:0044085	19/83	1413/13778	2.23	6.02E-4	4.01E-3	cellular component biogenesis
1	GO:0006508	13/83	765/13778	2.82	6.18E-4	4.09E-3	proteolysis
1	GO:0000003	19/83	1418/13778	2.22	6.29E-4	4.15E-3	reproduction
1	GO:0051436	4/83	67/13778	9.91	7.03E-4	4.61E-3	negative regulation of ubiquitin-protein ligase activity involved in mitotic cell cycle
1	GO:0007095	2/83	7/13778	47.43	7.38E-4	4.82E-3	mitotic cell cycle G2/M transition DNA damage checkpoint
1	GO:0006928	14/83	883/13778	2.63	7.45E-4	4.84E-3	cellular component movement
1	GO:0090304	34/83	3412/13778	1.65	8.26E-4	5.34E-3	nucleic acid metabolic process
1	GO:0016568	9/83	414/13778	3.61	8.43E-4	5.42E-3	chromatin modification
1	GO:0051444	4/83	72/13778	9.22	9.23E-4	5.88E-3	negative regulation of ubiquitin-protein ligase activity
1	GO:0051352	4/83	72/13778	9.22	9.23E-4	5.88E-3	negative regulation of ligase activity
1	GO:0009162	2/83	8/13778	41.50	9.81E-4	6.19E-3	deoxyribonucleoside monophosphate metabolic process
1	GO:0019985	2/83	8/13778	41.50	9.81E-4	6.19E-3	translesion synthesis
1	GO:0044265	11/83	612/13778	2.98	1.07E-3	6.72E-3	cellular macromolecule catabolic process
1	GO:0035825	3/83	34/13778	14.65	1.10E-3	6.86E-3	reciprocal DNA recombination
1	GO:0007131	3/83	34/13778	14.65	1.10E-3	6.86E-3	reciprocal meiotic recombination
1	GO:0007063	2/83	9/13778	36.89	1.26E-3	7.61E-3	regulation of sister chromatid cohesion
1	GO:0010569	2/83	9/13778	36.89	1.26E-3	7.61E-3	regulation of double-strand break repair via homologous recombination
1	GO:0032506	2/83	9/13778	36.89	1.26E-3	7.61E-3	cytokinetic process
1	GO:0009263	2/83	9/13778	36.89	1.26E-3	7.61E-3	deoxyribonucleotide biosynthetic process
1	GO:0000090	2/83	9/13778	36.89	1.26E-3	7.61E-3	mitotic anaphase
1	GO:0051323	2/83	9/13778	36.89	1.26E-3	7.61E-3	metaphase
1	GO:0006261	4/83	79/13778	8.41	1.31E-3	7.84E-3	DNA-dependent DNA replication
1	GO:0045931	3/83	36/13778	13.83	1.30E-3	7.84E-3	positive regulation of mitotic cell cycle
1	GO:0009057	12/83	739/13778	2.70	1.51E-3	9.00E-3	macromolecule catabolic process
1	GO:0051261	2/83	10/13778	33.20	1.56E-3	9.31E-3	protein depolymerization
1	GO:0000018	3/83	40/13778	12.45	1.77E-3	1.05E-2	regulation of DNA recombination
1	GO:0008608	2/83	11/13778	30.18	1.90E-3	1.11E-2	attachment of spindle microtubules to kinetochore
1	GO:0031109	2/83	11/13778	30.18	1.90E-3	1.11E-2	microtubule polymerization or depolymerization
1	GO:0051322	2/83	11/13778	30.18	1.90E-3	1.11E-2	anaphase
1	GO:0051246	18/83	1451/13778	2.06	2.17E-3	1.26E-2	regulation of protein metabolic process
1	GO:0055015	2/83	12/13778	27.67	2.28E-3	1.31E-2	ventricular cardiac muscle cell development
1	GO:0007091	2/83	12/13778	27.67	2.28E-3	1.31E-2	mitotic metaphase/anaphase transition
1	GO:0007596	9/83	480/13778	3.11	2.34E-3	1.34E-2	blood coagulation
1	GO:0050817	9/83	480/13778	3.11	2.34E-3	1.34E-2	coagulation
1	GO:0007599	9/83	484/13778	3.09	2.48E-3	1.41E-2	hemostasis
1	GO:0033044	4/83	95/13778	6.99	2.57E-3	1.45E-2	regulation of chromosome organization
1	GO:0009411	4/83	95/13778	6.99	2.57E-3	1.45E-2	response to UV
1	GO:0031397	4/83	95/13778	6.99	2.57E-3	1.45E-2	negative regulation of protein ubiquitination
1	GO:0044702	14/83	1007/13778	2.31	2.60E-3	1.46E-2	single organism reproductive process
1	GO:0051651	4/83	96/13778	6.92	2.67E-3	1.48E-2	maintenance of location in cell
1	GO:0007096	2/83	13/13778	25.54	2.68E-3	1.48E-2	regulation of exit from mitosis
1	GO:0000132	2/83	13/13778	25.54	2.68E-3	1.48E-2	establishment of mitotic spindle orientation
1	GO:0051313	2/83	13/13778	25.54	2.68E-3	1.48E-2	attachment of spindle microtubules to chromosome
1	GO:0008152	64/83	8568/13778	1.24	2.71E-3	1.49E-2	metabolic process
1	GO:0042060	10/83	598/13778	2.78	3.08E-3	1.69E-2	wound healing
1	GO:0006301	2/83	14/13778	23.71	3.11E-3	1.69E-2	postreplication repair
1	GO:0007143	2/83	14/13778	23.71	3.11E-3	1.69E-2	female meiosis
1	GO:0008544	8/83	411/13778	3.23	3.28E-3	1.77E-2	epidermis development
1	GO:0006282	3/83	50/13778	9.96	3.37E-3	1.81E-2	regulation of DNA repair
1	GO:0006325	9/83	509/13778	2.94	3.47E-3	1.86E-2	chromatin organization
1	GO:0006310	5/83	169/13778	4.91	3.52E-3	1.88E-2	DNA recombination
1	GO:0048477	3/83	51/13778	9.76	3.56E-3	1.90E-2	oogenesis
1	GO:0035556	16/83	1290/13778	2.06	3.97E-3	2.10E-2	intracellular signal transduction
1	GO:0051294	2/83	16/13778	20.75	4.07E-3	2.14E-2	establishment of spindle orientation
1	GO:0001556	2/83	16/13778	20.75	4.07E-3	2.14E-2	oocyte maturation
1	GO:0001932	12/83	840/13778	2.37	4.33E-3	2.27E-2	regulation of protein phosphorylation
1	GO:0031100	3/83	55/13778	9.05	4.41E-3	2.30E-2	organ regeneration
1	GO:0032880	7/83	342/13778	3.40	4.51E-3	2.34E-2	regulation of protein localization
1	GO:0071897	2/83	18/13778	18.44	5.15E-3	2.66E-2	DNA biosynthetic process
1	GO:0055012	2/83	18/13778	18.44	5.15E-3	2.66E-2	ventricular cardiac muscle cell differentiation
1	GO:0000084	4/83	116/13778	5.72	5.26E-3	2.70E-2	S phase of mitotic cell cycle
1	GO:0045859	10/83	647/13778	2.57	5.37E-3	2.75E-2	regulation of protein kinase activity
1	GO:0000741	1/83	1/13778	166.00	6.02E-3	2.82E-2	karyogamy
1	GO:0007344	1/83	1/13778	166.00	6.02E-3	2.82E-2	pronuclear fusion
1	GO:0043902	9/83	547/13778	2.73	5.54E-3	2.82E-2	positive regulation of multi-organism process
1	GO:0000915	1/83	1/13778	166.00	6.02E-3	2.82E-2	cytokinesis, actomyosin contractile ring assembly
1	GO:0000912	1/83	1/13778	166.00	6.02E-3	2.82E-2	assembly of actomyosin apparatus involved in cell cycle cytokinesis
1	GO:0046680	1/83	1/13778	166.00	6.02E-3	2.82E-2	response to DDT
1	GO:0020021	1/83	1/13778	166.00	6.02E-3	2.82E-2	immortalization of host cell
1	GO:0046601	1/83	1/13778	166.00	6.02E-3	2.82E-2	positive regulation of centriole replication
1	GO:0006231	1/83	1/13778	166.00	6.02E-3	2.82E-2	dTMP biosynthetic process
1	GO:0060623	1/83	1/13778	166.00	6.02E-3	2.82E-2	regulation of chromosome condensation
1	GO:0071283	1/83	1/13778	166.00	6.02E-3	2.82E-2	cellular response to iron(III) ion
1	GO:0019088	1/83	1/13778	166.00	6.02E-3	2.82E-2	immortalization of host cell by virus
1	GO:0051661	1/83	1/13778	166.00	6.02E-3	2.82E-2	maintenance of centrosome location
1	GO:0045870	1/83	1/13778	166.00	6.02E-3	2.82E-2	positive regulation of retroviral genome replication
1	GO:0043148	1/83	1/13778	166.00	6.02E-3	2.82E-2	mitotic spindle stabilization
1	GO:0043146	1/83	1/13778	166.00	6.02E-3	2.82E-2	spindle stabilization
1	GO:0046073	1/83	1/13778	166.00	6.02E-3	2.82E-2	dTMP metabolic process
1	GO:0031099	4/83	118/13778	5.63	5.59E-3	2.82E-2	regeneration
1	GO:2000042	1/83	1/13778	166.00	6.02E-3	2.82E-2	negative regulation of double-strand break repair via homologous recombination
1	GO:0045769	1/83	1/13778	166.00	6.02E-3	2.82E-2	negative regulation of asymmetric cell division
1	GO:0051105	1/83	1/13778	166.00	6.02E-3	2.82E-2	regulation of DNA ligation
1	GO:0051106	1/83	1/13778	166.00	6.02E-3	2.82E-2	positive regulation of DNA ligation
1	GO:0007108	1/83	1/13778	166.00	6.02E-3	2.82E-2	cytokinesis, initiation of separation
1	GO:0051987	1/83	1/13778	166.00	6.02E-3	2.82E-2	positive regulation of attachment of spindle microtubules to kinetochore
1	GO:0006334	4/83	118/13778	5.63	5.59E-3	2.82E-2	nucleosome assembly
1	GO:0051235	4/83	121/13778	5.49	6.10E-3	2.84E-2	maintenance of location
1	GO:0071900	7/83	369/13778	3.15	6.78E-3	3.15E-2	regulation of protein serine/threonine kinase activity
1	GO:0031497	4/83	126/13778	5.27	7.03E-3	3.22E-2	chromatin assembly
1	GO:0071478	3/83	65/13778	7.66	7.04E-3	3.22E-2	cellular response to radiation
1	GO:0060045	2/83	21/13778	15.81	6.99E-3	3.22E-2	positive regulation of cardiac muscle cell proliferation
1	GO:0051320	4/83	126/13778	5.27	7.03E-3	3.22E-2	S phase
1	GO:0007568	5/83	200/13778	4.15	7.13E-3	3.26E-2	aging
1	GO:0042325	12/83	898/13778	2.22	7.30E-3	3.32E-2	regulation of phosphorylation
1	GO:0043549	10/83	680/13778	2.44	7.55E-3	3.41E-2	regulation of kinase activity
1	GO:0051130	8/83	473/13778	2.81	7.55E-3	3.41E-2	positive regulation of cellular component organization
1	GO:0051324	2/83	22/13778	15.09	7.66E-3	3.45E-2	prophase
1	GO:0050878	9/83	577/13778	2.59	7.77E-3	3.49E-2	regulation of body fluid levels
1	GO:0033365	7/83	380/13778	3.06	7.91E-3	3.54E-2	protein localization to organelle
1	GO:0051338	10/83	696/13778	2.39	8.83E-3	3.93E-2	regulation of transferase activity
1	GO:0034728	4/83	138/13778	4.81	9.62E-3	4.27E-2	nucleosome organization
1	GO:0007405	2/83	25/13778	13.28	9.83E-3	4.35E-2	neuroblast proliferation
1	GO:0031401	10/83	718/13778	2.31	1.08E-2	4.79E-2	positive regulation of protein modification process
1	GO:0006796	22/83	2228/13778	1.64	1.10E-2	4.83E-2	phosphate-containing compound metabolic process
1	GO:0050790	19/83	1826/13778	1.73	1.11E-2	4.85E-2	regulation of catalytic activity
1	GO:0006333	4/83	144/13778	4.61	1.11E-2	4.86E-2	chromatin assembly or disassembly
1	GO:0010993	1/83	2/13778	83.00	1.20E-2	4.96E-2	regulation of ubiquitin homeostasis
1	GO:0010994	1/83	2/13778	83.00	1.20E-2	4.96E-2	free ubiquitin chain polymerization
1	GO:0010767	1/83	2/13778	83.00	1.20E-2	4.96E-2	regulation of transcription from RNA polymerase II promoter in response to UV-induced DNA damage
1	GO:0090007	1/83	2/13778	83.00	1.20E-2	4.96E-2	regulation of mitotic anaphase
1	GO:0046607	1/83	2/13778	83.00	1.20E-2	4.96E-2	positive regulation of centrosome cycle
1	GO:0009177	1/83	2/13778	83.00	1.20E-2	4.96E-2	pyrimidine deoxyribonucleoside monophosphate biosynthetic process
1	GO:2000615	1/83	2/13778	83.00	1.20E-2	4.96E-2	regulation of histone H3-K9 acetylation
1	GO:0009786	1/83	2/13778	83.00	1.20E-2	4.96E-2	regulation of asymmetric cell division
1	GO:0071281	1/83	2/13778	83.00	1.20E-2	4.96E-2	cellular response to iron ion
1	GO:0070683	1/83	2/13778	83.00	1.20E-2	4.96E-2	mitotic cell cycle G2/M transition decatenation checkpoint
1	GO:0045875	1/83	2/13778	83.00	1.20E-2	4.96E-2	negative regulation of sister chromatid cohesion
1	GO:0000216	3/83	79/13778	6.30	1.20E-2	4.96E-2	M/G1 transition of mitotic cell cycle
1	GO:0040038	1/83	2/13778	83.00	1.20E-2	4.96E-2	polar body extrusion after meiotic divisions
1	GO:0009262	2/83	27/13778	12.30	1.14E-2	4.96E-2	deoxyribonucleotide metabolic process
1	GO:0000072	1/83	2/13778	83.00	1.20E-2	4.96E-2	M phase specific microtubule process
1	GO:0007100	1/83	2/13778	83.00	1.20E-2	4.96E-2	mitotic centrosome separation
1	GO:0000088	1/83	2/13778	83.00	1.20E-2	4.96E-2	mitotic prophase
1	GO:0051984	1/83	2/13778	83.00	1.20E-2	4.96E-2	positive regulation of chromosome segregation
2	GO:0022904	18/83	94/13778	31.79	9.67E-23	5.66E-20	respiratory electron transport chain
2	GO:0045333	20/83	136/13778	24.41	8.85E-23	5.66E-20	cellular respiration
2	GO:0022900	19/83	128/13778	24.64	9.66E-22	3.77E-19	electron transport chain
2	GO:0015980	20/83	285/13778	11.65	2.68E-16	7.85E-14	energy derivation by oxidation of organic compounds
2	GO:0006091	21/83	386/13778	9.03	7.25E-15	1.70E-12	generation of precursor metabolites and energy
2	GO:0015992	13/83	112/13778	19.27	1.09E-13	2.13E-11	proton transport
2	GO:0006818	13/83	115/13778	18.77	1.55E-13	2.59E-11	hydrogen transport
2	GO:0006120	8/83	35/13778	37.94	2.53E-11	3.71E-9	mitochondrial electron transport, NADH to ubiquinone
2	GO:0055114	25/83	912/13778	4.55	6.44E-11	8.38E-9	oxidation-reduction process
2	GO:0015985	6/83	16/13778	62.25	3.04E-10	2.73E-8	energy coupled proton transport, down electrochemical gradient
2	GO:0015986	6/83	16/13778	62.25	3.04E-10	2.73E-8	ATP synthesis coupled proton transport
2	GO:0042775	8/83	46/13778	28.87	2.66E-10	2.73E-8	mitochondrial ATP synthesis coupled electron transport
2	GO:0042773	8/83	46/13778	28.87	2.66E-10	2.73E-8	ATP synthesis coupled electron transport
2	GO:0006119	8/83	54/13778	24.59	1.02E-9	8.54E-8	oxidative phosphorylation
2	GO:0042776	5/83	13/13778	63.85	8.70E-9	6.79E-7	mitochondrial ATP synthesis coupled proton transport
2	GO:0009142	7/83	64/13778	18.16	1.05E-7	7.67E-6	nucleoside triphosphate biosynthetic process
2	GO:0015672	13/83	366/13778	5.90	2.61E-7	1.80E-5	monovalent inorganic cation transport
2	GO:0006754	6/83	48/13778	20.75	3.99E-7	2.60E-5	ATP biosynthetic process
2	GO:0009206	6/83	56/13778	17.79	1.02E-6	6.26E-5	purine ribonucleoside triphosphate biosynthetic process
2	GO:0009145	6/83	57/13778	17.47	1.13E-6	6.62E-5	purine nucleoside triphosphate biosynthetic process
2	GO:0009201	6/83	60/13778	16.60	1.54E-6	8.57E-5	ribonucleoside triphosphate biosynthetic process
2	GO:0008380	10/83	286/13778	5.80	8.11E-6	4.32E-4	RNA splicing
2	GO:0046129	6/83	89/13778	11.19	1.55E-5	7.57E-4	purine ribonucleoside biosynthetic process
2	GO:0042451	6/83	89/13778	11.19	1.55E-5	7.57E-4	purine nucleoside biosynthetic process
2	GO:0044281	31/83	2437/13778	2.11	1.62E-5	7.58E-4	small molecule metabolic process
2	GO:0000375	8/83	191/13778	6.95	1.91E-5	8.61E-4	RNA splicing, via transesterification reactions
2	GO:0016071	13/83	557/13778	3.87	2.63E-5	1.14E-3	mRNA metabolic process
2	GO:0006839	6/83	102/13778	9.76	3.38E-5	1.41E-3	mitochondrial transport
2	GO:0042455	6/83	103/13778	9.67	3.57E-5	1.44E-3	ribonucleoside biosynthetic process
2	GO:0009163	6/83	111/13778	8.97	5.44E-5	1.99E-3	nucleoside biosynthetic process
2	GO:0006396	13/83	594/13778	3.63	5.13E-5	1.99E-3	RNA processing
2	GO:1901659	6/83	111/13778	8.97	5.44E-5	1.99E-3	glycosyl compound biosynthetic process
2	GO:0006397	10/83	359/13778	4.62	5.71E-5	2.03E-3	mRNA processing
2	GO:0009152	6/83	121/13778	8.23	8.81E-5	3.03E-3	purine ribonucleotide biosynthetic process
2	GO:0006812	14/83	721/13778	3.22	9.34E-5	3.12E-3	cation transport
2	GO:0000398	7/83	186/13778	6.25	1.28E-4	3.83E-3	mRNA splicing, via spliceosome
2	GO:0000377	7/83	186/13778	6.25	1.28E-4	3.83E-3	RNA splicing, via transesterification reactions with bulged adenosine as nucleophile
2	GO:0006164	6/83	128/13778	7.78	1.20E-4	3.83E-3	purine nucleotide biosynthetic process
2	GO:0044237	62/83	7521/13778	1.37	1.21E-4	3.83E-3	cellular metabolic process
2	GO:0009165	7/83	191/13778	6.08	1.50E-4	4.40E-3	nucleotide biosynthetic process
2	GO:0009260	6/83	134/13778	7.43	1.55E-4	4.42E-3	ribonucleotide biosynthetic process
2	GO:1901293	7/83	193/13778	6.02	1.60E-4	4.47E-3	nucleoside phosphate biosynthetic process
2	GO:0046390	6/83	139/13778	7.17	1.89E-4	5.14E-3	ribose phosphate biosynthetic process
2	GO:0072522	6/83	141/13778	7.06	2.04E-4	5.43E-3	purine-containing compound biosynthetic process
2	GO:0043928	3/83	22/13778	22.64	2.99E-4	7.61E-3	exonucleolytic nuclear-transcribed mRNA catabolic process involved in deadenylation-dependent decay
2	GO:0000291	3/83	22/13778	22.64	2.99E-4	7.61E-3	nuclear-transcribed mRNA catabolic process, exonucleolytic
2	GO:0002478	6/83	162/13778	6.15	4.31E-4	1.07E-2	antigen processing and presentation of exogenous peptide antigen
2	GO:0019884	6/83	164/13778	6.07	4.60E-4	1.12E-2	antigen processing and presentation of exogenous antigen
2	GO:0034220	13/83	750/13778	2.88	5.13E-4	1.23E-2	ion transmembrane transport
2	GO:0042638	6/83	174/13778	5.72	6.29E-4	1.44E-2	exogen
2	GO:0048002	6/83	176/13778	5.66	6.68E-4	1.44E-2	antigen processing and presentation of peptide antigen
2	GO:0015991	3/83	29/13778	17.17	6.88E-4	1.44E-2	ATP hydrolysis coupled proton transport
2	GO:0015988	3/83	29/13778	17.17	6.88E-4	1.44E-2	energy coupled proton transmembrane transport, against electrochemical gradient
2	GO:0006977	4/83	67/13778	9.91	7.03E-4	1.44E-2	DNA damage response, signal transduction by p53 class mediator resulting in cell cycle arrest
2	GO:0072413	4/83	67/13778	9.91	7.03E-4	1.44E-2	signal transduction involved in mitotic cell cycle checkpoint
2	GO:0072431	4/83	67/13778	9.91	7.03E-4	1.44E-2	signal transduction involved in mitotic cell cycle G1/S transition DNA damage checkpoint
2	GO:0072474	4/83	67/13778	9.91	7.03E-4	1.44E-2	signal transduction involved in mitotic cell cycle G1/S checkpoint
2	GO:0033572	3/83	30/13778	16.60	7.61E-4	1.46E-2	transferrin transport
2	GO:0072512	3/83	30/13778	16.60	7.61E-4	1.46E-2	trivalent inorganic cation transport
2	GO:0072404	4/83	68/13778	9.76	7.44E-4	1.46E-2	signal transduction involved in G1/S transition checkpoint
2	GO:0015682	3/83	30/13778	16.60	7.61E-4	1.46E-2	ferric iron transport
2	GO:0072422	4/83	69/13778	9.62	7.86E-4	1.46E-2	signal transduction involved in DNA damage checkpoint
2	GO:0072401	4/83	69/13778	9.62	7.86E-4	1.46E-2	signal transduction involved in DNA integrity checkpoint
2	GO:0072395	4/83	70/13778	9.49	8.30E-4	1.52E-2	signal transduction involved in cell cycle checkpoint
2	GO:0048820	6/83	186/13778	5.35	8.91E-4	1.61E-2	hair follicle maturation
2	GO:0031571	4/83	73/13778	9.10	9.72E-4	1.72E-2	mitotic cell cycle G1/S transition DNA damage checkpoint
2	GO:0019882	6/83	197/13778	5.06	1.20E-3	2.10E-2	antigen processing and presentation
2	GO:0008152	65/83	8568/13778	1.26	1.23E-3	2.12E-2	metabolic process
2	GO:0000216	4/83	79/13778	8.41	1.31E-3	2.22E-2	M/G1 transition of mitotic cell cycle
2	GO:0031575	4/83	81/13778	8.20	1.43E-3	2.38E-2	mitotic cell cycle G1/S transition checkpoint
2	GO:0044710	62/83	8050/13778	1.28	1.44E-3	2.38E-2	single-organism metabolic process
2	GO:0071158	4/83	82/13778	8.10	1.50E-3	2.44E-2	positive regulation of cell cycle arrest
2	GO:0090382	3/83	38/13778	13.11	1.53E-3	2.45E-2	phagosome maturation
2	GO:0071779	4/83	83/13778	8.00	1.57E-3	2.48E-2	G1/S transition checkpoint
2	GO:0071695	6/83	212/13778	4.70	1.74E-3	2.72E-2	anatomical structure maturation
2	GO:0006412	11/83	654/13778	2.79	1.82E-3	2.80E-2	translation
2	GO:0030330	4/83	88/13778	7.55	1.94E-3	2.96E-2	DNA damage response, signal transduction by p53 class mediator
2	GO:0002474	4/83	95/13778	6.99	2.57E-3	3.76E-2	antigen processing and presentation of peptide antigen via MHC class I
2	GO:0031397	4/83	95/13778	6.99	2.57E-3	3.76E-2	negative regulation of protein ubiquitination
2	GO:0055085	15/83	1117/13778	2.23	2.52E-3	3.76E-2	transmembrane transport
2	GO:0006283	3/83	46/13778	10.83	2.66E-3	3.84E-2	transcription-coupled nucleotide-excision repair
2	GO:0006811	14/83	1013/13778	2.29	2.74E-3	3.92E-2	ion transport
2	GO:0006826	3/83	47/13778	10.60	2.82E-3	3.98E-2	iron ion transport
2	GO:0042770	4/83	99/13778	6.71	2.99E-3	4.16E-2	signal transduction in response to DNA damage
2	GO:2000045	4/83	101/13778	6.57	3.21E-3	4.42E-2	regulation of G1/S transition of mitotic cell cycle
2	GO:0090407	8/83	415/13778	3.20	3.48E-3	4.52E-2	organophosphate biosynthetic process
2	GO:0022405	6/83	244/13778	4.08	3.51E-3	4.52E-2	hair cycle process
2	GO:0022404	6/83	244/13778	4.08	3.51E-3	4.52E-2	molting cycle process
2	GO:0006793	24/83	2283/13778	1.75	3.39E-3	4.52E-2	phosphorus metabolic process
2	GO:0000288	3/83	50/13778	9.96	3.37E-3	4.52E-2	nuclear-transcribed mRNA catabolic process, deadenylation-dependent decay
2	GO:0001942	6/83	244/13778	4.08	3.51E-3	4.52E-2	hair follicle development
2	GO:1901137	9/83	511/13778	2.92	3.56E-3	4.53E-2	carbohydrate derivative biosynthetic process
2	GO:0046907	13/83	932/13778	2.32	3.64E-3	4.58E-2	intracellular transport
2	GO:0042633	6/83	247/13778	4.03	3.73E-3	4.60E-2	hair cycle
2	GO:0042303	6/83	247/13778	4.03	3.73E-3	4.60E-2	molting cycle
2	GO:0050434	3/83	53/13778	9.40	3.98E-3	4.85E-2	positive regulation of viral transcription
3	GO:0006955	69/134	837/13778	8.48	2.69E-48	6.52E-45	immune response
3	GO:0002376	85/134	1534/13778	5.70	5.74E-48	6.95E-45	immune system process
3	GO:0006952	66/134	905/13778	7.50	1.97E-42	1.59E-39	defense response
3	GO:0002682	59/134	832/13778	7.29	1.31E-36	7.93E-34	regulation of immune system process
3	GO:0002684	48/134	503/13778	9.81	4.07E-35	1.97E-32	positive regulation of immune system process
3	GO:0050776	46/134	506/13778	9.35	1.31E-32	5.30E-30	regulation of immune response
3	GO:0050778	38/134	319/13778	12.25	4.20E-31	1.45E-28	positive regulation of immune response
3	GO:0006954	38/134	359/13778	10.88	3.69E-29	1.12E-26	inflammatory response
3	GO:0002253	33/134	245/13778	13.85	1.02E-28	2.75E-26	activation of immune response
3	GO:0045087	38/134	452/13778	8.64	1.87E-25	4.54E-23	innate immune response
3	GO:0002764	29/134	216/13778	13.80	3.42E-25	7.54E-23	immune response-regulating signaling pathway
3	GO:0009611	51/134	973/13778	5.39	6.43E-25	1.30E-22	response to wounding
3	GO:0002757	28/134	203/13778	14.18	1.15E-24	2.15E-22	immune response-activating signal transduction
3	GO:0045321	33/134	340/13778	9.98	4.87E-24	8.44E-22	leukocyte activation
3	GO:0050865	33/134	346/13778	9.81	8.55E-24	1.38E-21	regulation of cell activation
3	GO:0006950	78/134	2643/13778	3.03	1.21E-23	1.83E-21	response to stress
3	GO:0050867	28/134	233/13778	12.36	5.67E-23	8.08E-21	positive regulation of cell activation
3	GO:0048584	51/134	1077/13778	4.87	6.70E-23	9.03E-21	positive regulation of response to stimulus
3	GO:0002252	30/134	288/13778	10.71	9.41E-23	1.20E-20	immune effector process
3	GO:0002694	31/134	322/13778	9.90	1.80E-22	2.18E-20	regulation of leukocyte activation
3	GO:0048583	70/134	2313/13778	3.11	3.89E-21	4.49E-19	regulation of response to stimulus
3	GO:0050896	112/134	6116/13778	1.88	5.47E-21	6.03E-19	response to stimulus
3	GO:0002696	26/134	225/13778	11.88	6.42E-21	6.77E-19	positive regulation of leukocyte activation
3	GO:0050870	23/134	161/13778	14.69	1.05E-20	1.06E-18	positive regulation of T cell activation
3	GO:0001775	36/134	540/13778	6.85	1.15E-20	1.08E-18	cell activation
3	GO:0051249	28/134	282/13778	10.21	1.11E-20	1.08E-18	regulation of lymphocyte activation
3	GO:0002768	21/134	124/13778	17.41	1.43E-20	1.28E-18	immune response-regulating cell surface receptor signaling pathway
3	GO:0002429	20/134	113/13778	18.20	4.95E-20	4.29E-18	immune response-activating cell surface receptor signaling pathway
3	GO:0051251	24/134	206/13778	11.98	1.95E-19	1.63E-17	positive regulation of lymphocyte activation
3	GO:0050863	24/134	215/13778	11.48	5.38E-19	4.35E-17	regulation of T cell activation
3	GO:0002274	17/134	79/13778	22.13	1.06E-18	8.27E-17	myeloid leukocyte activation
3	GO:0001817	29/134	369/13778	8.08	1.39E-18	1.05E-16	regulation of cytokine production
3	GO:0002263	17/134	83/13778	21.06	2.61E-18	1.86E-16	cell activation involved in immune response
3	GO:0002366	17/134	83/13778	21.06	2.61E-18	1.86E-16	leukocyte activation involved in immune response
3	GO:0002275	12/134	31/13778	39.80	5.23E-17	3.62E-15	myeloid cell activation involved in immune response
3	GO:0050851	16/134	104/13778	15.82	3.31E-15	2.23E-13	antigen receptor-mediated signaling pathway
3	GO:0031347	27/134	419/13778	6.63	3.61E-15	2.36E-13	regulation of defense response
3	GO:0050670	18/134	149/13778	12.42	4.54E-15	2.90E-13	regulation of lymphocyte proliferation
3	GO:0032944	18/134	150/13778	12.34	5.12E-15	3.18E-13	regulation of mononuclear cell proliferation
3	GO:0070663	18/134	154/13778	12.02	8.19E-15	4.97E-13	regulation of leukocyte proliferation
3	GO:0046649	22/134	273/13778	8.29	1.81E-14	1.07E-12	lymphocyte activation
3	GO:0048518	73/134	3346/13778	2.24	4.95E-14	2.86E-12	positive regulation of biological process
3	GO:0002443	15/134	113/13778	13.65	2.40E-13	1.35E-11	leukocyte mediated immunity
3	GO:0009617	22/134	315/13778	7.18	3.41E-13	1.88E-11	response to bacterium
3	GO:0051707	27/134	514/13778	5.40	5.07E-13	2.73E-11	response to other organism
3	GO:0007165	76/134	3808/13778	2.05	1.21E-12	6.40E-11	signal transduction
3	GO:0009607	27/134	535/13778	5.19	1.30E-12	6.73E-11	response to biotic stimulus
3	GO:0007166	56/134	2232/13778	2.58	1.36E-12	6.89E-11	cell surface receptor signaling pathway
3	GO:0042129	14/134	105/13778	13.71	1.47E-12	7.28E-11	regulation of T cell proliferation
3	GO:0002697	18/134	209/13778	8.86	1.70E-12	8.22E-11	regulation of immune effector process
3	GO:0080134	31/134	727/13778	4.38	1.83E-12	8.71E-11	regulation of response to stress
3	GO:0071345	23/134	398/13778	5.94	4.85E-12	2.26E-10	cellular response to cytokine stimulus
3	GO:0050853	9/134	29/13778	31.91	5.04E-12	2.31E-10	B cell receptor signaling pathway
3	GO:0001819	17/134	194/13778	9.01	5.56E-12	2.49E-10	positive regulation of cytokine production
3	GO:0044699	109/134	7311/13778	1.53	5.95E-12	2.62E-10	single-organism process
3	GO:0002250	14/134	117/13778	12.30	6.68E-12	2.89E-10	adaptive immune response
3	GO:0050900	17/134	198/13778	8.83	7.73E-12	3.29E-10	leukocyte migration
3	GO:0034097	25/134	490/13778	5.25	7.90E-12	3.30E-10	response to cytokine stimulus
3	GO:0002699	13/134	99/13778	13.50	1.17E-11	4.82E-10	positive regulation of immune effector process
3	GO:0048002	16/134	176/13778	9.35	1.39E-11	5.62E-10	antigen processing and presentation of peptide antigen
3	GO:0051239	47/134	1744/13778	2.77	1.83E-11	7.28E-10	regulation of multicellular organismal process
3	GO:0071216	13/134	103/13778	12.98	1.96E-11	7.68E-10	cellular response to biotic stimulus
3	GO:0031349	17/134	211/13778	8.28	2.14E-11	8.24E-10	positive regulation of defense response
3	GO:0019221	20/134	320/13778	6.43	3.39E-11	1.28E-9	cytokine-mediated signaling pathway
3	GO:0051716	83/134	4702/13778	1.82	3.78E-11	1.41E-9	cellular response to stimulus
3	GO:0051240	24/134	485/13778	5.09	4.14E-11	1.52E-9	positive regulation of multicellular organismal process
3	GO:0002478	15/134	162/13778	9.52	4.83E-11	1.73E-9	antigen processing and presentation of exogenous peptide antigen
3	GO:0007154	79/134	4349/13778	1.87	4.85E-11	1.73E-9	cell communication
3	GO:0019884	15/134	164/13778	9.40	5.76E-11	2.02E-9	antigen processing and presentation of exogenous antigen
3	GO:0071219	12/134	91/13778	13.56	7.14E-11	2.47E-9	cellular response to molecule of bacterial origin
3	GO:0019882	16/134	197/13778	8.35	7.68E-11	2.62E-9	antigen processing and presentation
3	GO:0007229	11/134	72/13778	15.71	8.87E-11	2.99E-9	integrin-mediated signaling pathway
3	GO:0050764	9/134	39/13778	23.73	9.83E-11	3.26E-9	regulation of phagocytosis
3	GO:0023052	77/134	4245/13778	1.87	1.30E-10	4.21E-9	signaling
3	GO:0044700	77/134	4245/13778	1.87	1.30E-10	4.21E-9	single organism signaling
3	GO:0042638	15/134	174/13778	8.86	1.34E-10	4.28E-9	exogen
3	GO:0034341	12/134	98/13778	12.59	1.74E-10	5.46E-9	response to interferon-gamma
3	GO:0045088	16/134	210/13778	7.83	2.00E-10	6.15E-9	regulation of innate immune response
3	GO:0042110	15/134	179/13778	8.62	2.00E-10	6.15E-9	T cell activation
3	GO:0071695	16/134	212/13778	7.76	2.30E-10	6.97E-9	anatomical structure maturation
3	GO:0071346	11/134	79/13778	14.32	2.51E-10	7.50E-9	cellular response to interferon-gamma
3	GO:0048820	15/134	186/13778	8.29	3.44E-10	1.02E-8	hair follicle maturation
3	GO:0070665	12/134	104/13778	11.86	3.52E-10	1.03E-8	positive regulation of leukocyte proliferation
3	GO:0016192	29/134	797/13778	3.74	4.82E-10	1.39E-8	vesicle-mediated transport
3	GO:0006909	10/134	64/13778	16.07	5.23E-10	1.49E-8	phagocytosis
3	GO:0048522	62/134	3062/13778	2.08	5.40E-10	1.52E-8	positive regulation of cellular process
3	GO:0071222	11/134	85/13778	13.31	5.63E-10	1.57E-8	cellular response to lipopolysaccharide
3	GO:0030097	20/134	375/13778	5.48	5.68E-10	1.57E-8	hemopoiesis
3	GO:0002521	16/134	226/13778	7.28	5.93E-10	1.61E-8	leukocyte differentiation
3	GO:0042221	59/134	2840/13778	2.14	7.09E-10	1.91E-8	response to chemical stimulus
3	GO:0032649	10/134	66/13778	15.58	7.17E-10	1.91E-8	regulation of interferon-gamma production
3	GO:0032101	20/134	386/13778	5.33	9.41E-10	2.48E-8	regulation of response to external stimulus
3	GO:0042102	10/134	68/13778	15.12	9.72E-10	2.53E-8	positive regulation of T cell proliferation
3	GO:0002532	6/134	13/13778	47.46	1.23E-9	3.13E-8	production of molecular mediator involved in inflammatory response
3	GO:0045730	6/134	13/13778	47.46	1.23E-9	3.13E-8	respiratory burst
3	GO:0002819	11/134	92/13778	12.29	1.34E-9	3.38E-8	regulation of adaptive immune response
3	GO:0002520	21/134	439/13778	4.92	1.45E-9	3.63E-8	immune system development
3	GO:0002218	12/134	118/13778	10.46	1.55E-9	3.83E-8	activation of innate immune response
3	GO:0045089	13/134	146/13778	9.16	1.64E-9	4.00E-8	positive regulation of innate immune response
3	GO:0042742	12/134	119/13778	10.37	1.71E-9	4.14E-8	defense response to bacterium
3	GO:0002703	11/134	96/13778	11.78	2.13E-9	5.10E-8	regulation of leukocyte mediated immunity
3	GO:0002237	15/134	218/13778	7.07	3.13E-9	7.42E-8	response to molecule of bacterial origin
3	GO:0048534	20/134	414/13778	4.97	3.15E-9	7.42E-8	hematopoietic or lymphoid organ development
3	GO:0030100	12/134	126/13778	9.79	3.30E-9	7.70E-8	regulation of endocytosis
3	GO:0050671	11/134	101/13778	11.20	3.68E-9	8.49E-8	positive regulation of lymphocyte proliferation
3	GO:0032946	11/134	102/13778	11.09	4.09E-9	9.26E-8	positive regulation of mononuclear cell proliferation
3	GO:0002695	11/134	102/13778	11.09	4.09E-9	9.26E-8	negative regulation of leukocyte activation
3	GO:0021700	18/134	336/13778	5.51	4.16E-9	9.35E-8	developmental maturation
3	GO:0046634	9/134	58/13778	15.95	4.23E-9	9.40E-8	regulation of alpha-beta T cell activation
3	GO:0002460	11/134	103/13778	10.98	4.54E-9	1.00E-7	adaptive immune response based on somatic recombination of immune receptors built from immunoglobulin superfamily domains
3	GO:0046635	8/134	42/13778	19.58	5.80E-9	1.27E-7	positive regulation of alpha-beta T cell activation
3	GO:0050789	111/134	8226/13778	1.39	6.14E-9	1.33E-7	regulation of biological process
3	GO:0045621	9/134	61/13778	15.17	6.72E-9	1.44E-7	positive regulation of lymphocyte differentiation
3	GO:0050864	10/134	83/13778	12.39	7.19E-9	1.53E-7	regulation of B cell activation
3	GO:0031295	9/134	62/13778	14.93	7.79E-9	1.64E-7	T cell costimulation
3	GO:0002700	9/134	63/13778	14.69	9.02E-9	1.87E-7	regulation of production of molecular mediator of immune response
3	GO:0031294	9/134	63/13778	14.69	9.02E-9	1.87E-7	lymphocyte costimulation
3	GO:0050766	7/134	29/13778	24.82	9.18E-9	1.89E-7	positive regulation of phagocytosis
3	GO:0046645	5/134	9/13778	57.12	9.86E-9	1.99E-7	positive regulation of gamma-delta T cell activation
3	GO:0046643	5/134	9/13778	57.12	9.86E-9	1.99E-7	regulation of gamma-delta T cell activation
3	GO:0050866	11/134	111/13778	10.19	1.01E-8	2.02E-7	negative regulation of cell activation
3	GO:0065007	114/134	8661/13778	1.35	1.02E-8	2.02E-7	biological regulation
3	GO:0060333	9/134	64/13778	14.46	1.04E-8	2.05E-7	interferon-gamma-mediated signaling pathway
3	GO:0002758	11/134	113/13778	10.01	1.22E-8	2.36E-7	innate immune response-activating signal transduction
3	GO:0002683	13/134	172/13778	7.77	1.21E-8	2.36E-7	negative regulation of immune system process
3	GO:0045576	6/134	18/13778	34.27	1.28E-8	2.45E-7	mast cell activation
3	GO:0022405	15/134	244/13778	6.32	1.44E-8	2.69E-7	hair cycle process
3	GO:0022404	15/134	244/13778	6.32	1.44E-8	2.69E-7	molting cycle process
3	GO:0051250	10/134	89/13778	11.55	1.43E-8	2.69E-7	negative regulation of lymphocyte activation
3	GO:0001942	15/134	244/13778	6.32	1.44E-8	2.69E-7	hair follicle development
3	GO:0032496	14/134	209/13778	6.89	1.52E-8	2.82E-7	response to lipopolysaccharide
3	GO:0042633	15/134	247/13778	6.24	1.70E-8	3.10E-7	hair cycle
3	GO:0042303	15/134	247/13778	6.24	1.70E-8	3.10E-7	molting cycle
3	GO:0032680	9/134	68/13778	13.61	1.80E-8	3.26E-7	regulation of tumor necrosis factor production
3	GO:0032760	7/134	33/13778	21.81	2.43E-8	4.37E-7	positive regulation of tumor necrosis factor production
3	GO:0060627	14/134	218/13778	6.60	2.60E-8	4.64E-7	regulation of vesicle-mediated transport
3	GO:0043299	6/134	20/13778	30.85	2.62E-8	4.64E-7	leukocyte degranulation
3	GO:0070887	39/134	1594/13778	2.52	2.79E-8	4.91E-7	cellular response to chemical stimulus
3	GO:0045582	8/134	52/13778	15.82	3.41E-8	5.94E-7	positive regulation of T cell differentiation
3	GO:0042116	6/134	21/13778	29.38	3.64E-8	6.30E-7	macrophage activation
3	GO:0045619	10/134	99/13778	10.39	4.04E-8	6.93E-7	regulation of lymphocyte differentiation
3	GO:0009605	30/134	1030/13778	2.99	4.06E-8	6.93E-7	response to external stimulus
3	GO:0030098	12/134	159/13778	7.76	4.61E-8	7.81E-7	lymphocyte differentiation
3	GO:0050707	9/134	76/13778	12.18	4.88E-8	8.21E-7	regulation of cytokine secretion
3	GO:0050852	9/134	79/13778	11.71	6.88E-8	1.14E-6	T cell receptor signaling pathway
3	GO:0002718	7/134	38/13778	18.94	6.90E-8	1.14E-6	regulation of cytokine production involved in immune response
3	GO:0090382	7/134	38/13778	18.94	6.90E-8	1.14E-6	phagosome maturation
3	GO:0030595	9/134	81/13778	11.42	8.58E-8	1.40E-6	leukocyte chemotaxis
3	GO:0002702	6/134	24/13778	25.71	8.82E-8	1.43E-6	positive regulation of production of molecular mediator of immune response
3	GO:0002221	10/134	110/13778	9.35	1.11E-7	1.79E-6	pattern recognition receptor signaling pathway
3	GO:0002822	9/134	84/13778	11.02	1.18E-7	1.90E-6	regulation of adaptive immune response based on somatic recombination of immune receptors built from immunoglobulin superfamily domains
3	GO:0006897	16/134	329/13778	5.00	1.23E-7	1.97E-6	endocytosis
3	GO:0002444	6/134	26/13778	23.73	1.48E-7	2.31E-6	myeloid leukocyte mediated immunity
3	GO:0051050	19/134	472/13778	4.14	1.48E-7	2.31E-6	positive regulation of transport
3	GO:0045055	6/134	26/13778	23.73	1.48E-7	2.31E-6	regulated secretory pathway
3	GO:0045058	6/134	26/13778	23.73	1.48E-7	2.31E-6	T cell selection
3	GO:0002449	9/134	87/13778	10.64	1.61E-7	2.45E-6	lymphocyte mediated immunity
3	GO:0002685	9/134	87/13778	10.64	1.61E-7	2.45E-6	regulation of leukocyte migration
3	GO:0006959	9/134	87/13778	10.64	1.61E-7	2.45E-6	humoral immune response
3	GO:0019886	9/134	88/13778	10.52	1.77E-7	2.69E-6	antigen processing and presentation of exogenous peptide antigen via MHC class II
3	GO:0006887	13/134	216/13778	6.19	1.79E-7	2.70E-6	exocytosis
3	GO:0002687	8/134	64/13778	12.85	1.82E-7	2.72E-6	positive regulation of leukocyte migration
3	GO:0065008	47/134	2313/13778	2.09	2.09E-7	3.10E-6	regulation of biological quality
3	GO:0002495	9/134	90/13778	10.28	2.16E-7	3.19E-6	antigen processing and presentation of peptide antigen via MHC class II
3	GO:0002504	9/134	91/13778	10.17	2.37E-7	3.49E-6	antigen processing and presentation of peptide or polysaccharide antigen via MHC class II
3	GO:0002283	4/134	7/13778	58.75	2.93E-7	4.22E-6	neutrophil activation involved in immune response
3	GO:0045588	4/134	7/13778	58.75	2.93E-7	4.22E-6	positive regulation of gamma-delta T cell differentiation
3	GO:0045586	4/134	7/13778	58.75	2.93E-7	4.22E-6	regulation of gamma-delta T cell differentiation
3	GO:0032722	6/134	29/13778	21.27	2.99E-7	4.29E-6	positive regulation of chemokine production
3	GO:0002821	7/134	47/13778	15.31	3.20E-7	4.55E-6	positive regulation of adaptive immune response
3	GO:0032103	11/134	155/13778	7.30	3.21E-7	4.55E-6	positive regulation of response to external stimulus
3	GO:0051701	17/134	401/13778	4.36	3.44E-7	4.85E-6	interaction with host
3	GO:0045807	8/134	71/13778	11.59	4.13E-7	5.78E-6	positive regulation of endocytosis
3	GO:0030335	13/134	234/13778	5.71	4.51E-7	6.28E-6	positive regulation of cell migration
3	GO:0050727	12/134	196/13778	6.30	4.54E-7	6.29E-6	regulation of inflammatory response
3	GO:0032945	7/134	50/13778	14.39	4.96E-7	6.79E-6	negative regulation of mononuclear cell proliferation
3	GO:0050672	7/134	50/13778	14.39	4.96E-7	6.79E-6	negative regulation of lymphocyte proliferation
3	GO:2000147	13/134	238/13778	5.62	5.47E-7	7.45E-6	positive regulation of cell motility
3	GO:0032879	34/134	1436/13778	2.43	6.23E-7	8.37E-6	regulation of localization
3	GO:0045577	5/134	18/13778	28.56	6.25E-7	8.37E-6	regulation of B cell differentiation
3	GO:0002720	5/134	18/13778	28.56	6.25E-7	8.37E-6	positive regulation of cytokine production involved in immune response
3	GO:0002706	8/134	75/13778	10.97	6.33E-7	8.43E-6	regulation of lymphocyte mediated immunity
3	GO:0040011	27/134	979/13778	2.84	6.57E-7	8.70E-6	locomotion
3	GO:0044403	17/134	423/13778	4.13	7.26E-7	9.51E-6	symbiosis, encompassing mutualism through parasitism
3	GO:0044419	17/134	423/13778	4.13	7.26E-7	9.51E-6	interspecies interaction between organisms
3	GO:0060326	9/134	104/13778	8.90	7.48E-7	9.70E-6	cell chemotaxis
3	GO:0070664	7/134	53/13778	13.58	7.47E-7	9.70E-6	negative regulation of leukocyte proliferation
3	GO:0042590	8/134	77/13778	10.68	7.77E-7	1.00E-5	antigen processing and presentation of exogenous peptide antigen via MHC class I
3	GO:0051272	13/134	246/13778	5.43	7.96E-7	1.02E-5	positive regulation of cellular component movement
3	GO:0002712	6/134	34/13778	18.14	8.13E-7	1.04E-5	regulation of B cell mediated immunity
3	GO:0040017	13/134	247/13778	5.41	8.33E-7	1.06E-5	positive regulation of locomotion
3	GO:2001179	3/134	3/13778	102.82	9.00E-7	1.14E-5	regulation of interleukin-10 secretion
3	GO:0045580	8/134	79/13778	10.41	9.48E-7	1.19E-5	regulation of T cell differentiation
3	GO:0042098	6/134	35/13778	17.63	9.74E-7	1.21E-5	T cell proliferation
3	GO:0030593	6/134	35/13778	17.63	9.74E-7	1.21E-5	neutrophil chemotaxis
3	GO:0045059	4/134	9/13778	45.70	1.04E-6	1.28E-5	positive thymic T cell selection
3	GO:0042060	20/134	598/13778	3.44	1.28E-6	1.58E-5	wound healing
3	GO:0050794	102/134	7778/13778	1.35	1.54E-6	1.88E-5	regulation of cellular process
3	GO:0042127	29/134	1163/13778	2.56	1.84E-6	2.24E-5	regulation of cell proliferation
3	GO:1901568	7/134	61/13778	11.80	1.98E-6	2.39E-5	fatty acid derivative metabolic process
3	GO:0006690	7/134	61/13778	11.80	1.98E-6	2.39E-5	icosanoid metabolic process
3	GO:0016064	7/134	62/13778	11.61	2.22E-6	2.65E-5	immunoglobulin mediated immune response
3	GO:0042108	7/134	62/13778	11.61	2.22E-6	2.65E-5	positive regulation of cytokine biosynthetic process
3	GO:0071310	30/134	1247/13778	2.47	2.46E-6	2.92E-5	cellular response to organic substance
3	GO:0007159	6/134	41/13778	15.05	2.57E-6	3.04E-5	leukocyte cell-cell adhesion
3	GO:0002279	4/134	11/13778	37.39	2.68E-6	3.11E-5	mast cell activation involved in immune response
3	GO:0002281	4/134	11/13778	37.39	2.68E-6	3.11E-5	macrophage activation involved in immune response
3	GO:0043303	4/134	11/13778	37.39	2.68E-6	3.11E-5	mast cell degranulation
3	GO:0006911	4/134	11/13778	37.39	2.68E-6	3.11E-5	phagocytosis, engulfment
3	GO:0019724	7/134	64/13778	11.25	2.75E-6	3.18E-5	B cell mediated immunity
3	GO:0050708	9/134	122/13778	7.59	2.87E-6	3.29E-5	regulation of protein secretion
3	GO:0002886	5/134	24/13778	21.42	2.96E-6	3.38E-5	regulation of myeloid leukocyte mediated immunity
3	GO:0050878	19/134	577/13778	3.39	3.05E-6	3.46E-5	regulation of body fluid levels
3	GO:0002224	8/134	92/13778	8.94	3.04E-6	3.46E-5	toll-like receptor signaling pathway
3	GO:0050730	10/134	158/13778	6.51	3.19E-6	3.59E-5	regulation of peptidyl-tyrosine phosphorylation
3	GO:0032940	15/134	373/13778	4.13	3.40E-6	3.81E-5	secretion by cell
3	GO:1901570	6/134	43/13778	14.35	3.43E-6	3.82E-5	fatty acid derivative biosynthetic process
3	GO:0046456	6/134	43/13778	14.35	3.43E-6	3.82E-5	icosanoid biosynthetic process
3	GO:0010033	38/134	1843/13778	2.12	3.52E-6	3.89E-5	response to organic substance
3	GO:0008284	20/134	640/13778	3.21	3.61E-6	3.98E-5	positive regulation of cell proliferation
3	GO:0002474	8/134	95/13778	8.66	3.88E-6	4.23E-5	antigen processing and presentation of peptide antigen via MHC class I
3	GO:0051049	27/134	1074/13778	2.58	3.87E-6	4.23E-5	regulation of transport
3	GO:0002824	6/134	44/13778	14.02	3.94E-6	4.28E-5	positive regulation of adaptive immune response based on somatic recombination of immune receptors built from immunoglobulin superfamily domains
3	GO:0002448	4/134	12/13778	34.27	3.99E-6	4.29E-5	mast cell mediated immunity
3	GO:0043368	4/134	12/13778	34.27	3.99E-6	4.29E-5	positive T cell selection
3	GO:0007596	17/134	480/13778	3.64	4.06E-6	4.33E-5	blood coagulation
3	GO:0050817	17/134	480/13778	3.64	4.06E-6	4.33E-5	coagulation
3	GO:0042035	8/134	96/13778	8.57	4.20E-6	4.46E-5	regulation of cytokine biosynthetic process
3	GO:0033003	5/134	26/13778	19.77	4.51E-6	4.77E-5	regulation of mast cell activation
3	GO:0007599	17/134	484/13778	3.61	4.53E-6	4.78E-5	hemostasis
3	GO:0006636	6/134	46/13778	13.41	5.15E-6	5.40E-5	unsaturated fatty acid biosynthetic process
3	GO:0042330	18/134	546/13778	3.39	5.61E-6	5.83E-5	taxis
3	GO:0006935	18/134	546/13778	3.39	5.61E-6	5.83E-5	chemotaxis
3	GO:0002891	4/134	13/13778	31.64	5.71E-6	5.87E-5	positive regulation of immunoglobulin mediated immune response
3	GO:0002714	4/134	13/13778	31.64	5.71E-6	5.87E-5	positive regulation of B cell mediated immunity
3	GO:0010324	4/134	13/13778	31.64	5.71E-6	5.87E-5	membrane invagination
3	GO:0051241	14/134	341/13778	4.22	5.80E-6	5.94E-5	negative regulation of multicellular organismal process
3	GO:0046638	5/134	28/13778	18.36	6.63E-6	6.70E-5	positive regulation of alpha-beta T cell differentiation
3	GO:0032653	5/134	28/13778	18.36	6.63E-6	6.70E-5	regulation of interleukin-10 production
3	GO:0031663	5/134	28/13778	18.36	6.63E-6	6.70E-5	lipopolysaccharide-mediated signaling pathway
3	GO:0033559	7/134	73/13778	9.86	6.72E-6	6.76E-5	unsaturated fatty acid metabolic process
3	GO:0042113	8/134	103/13778	7.99	7.11E-6	7.12E-5	B cell activation
3	GO:0032844	12/134	256/13778	4.82	7.41E-6	7.39E-5	regulation of homeostatic process
3	GO:0032642	6/134	49/13778	12.59	7.50E-6	7.45E-5	regulation of chemokine production
3	GO:0042554	4/134	14/13778	29.38	7.94E-6	7.86E-5	superoxide anion generation
3	GO:0050793	31/134	1395/13778	2.28	8.30E-6	8.18E-5	regulation of developmental process
3	GO:0052552	3/134	5/13778	61.69	8.87E-6	8.56E-5	modulation by organism of immune response of other organism involved in symbiotic interaction
3	GO:0052553	3/134	5/13778	61.69	8.87E-6	8.56E-5	modulation by symbiont of host immune response
3	GO:0052556	3/134	5/13778	61.69	8.87E-6	8.56E-5	positive regulation by symbiont of host immune response
3	GO:0052555	3/134	5/13778	61.69	8.87E-6	8.56E-5	positive regulation by organism of immune response of other organism involved in symbiotic interaction
3	GO:0002238	3/134	5/13778	61.69	8.87E-6	8.56E-5	response to molecule of fungal origin
3	GO:0009967	21/134	746/13778	2.89	1.02E-5	9.76E-5	positive regulation of signal transduction
3	GO:0046641	4/134	15/13778	27.42	1.07E-5	1.02E-4	positive regulation of alpha-beta T cell proliferation
3	GO:0042119	4/134	15/13778	27.42	1.07E-5	1.02E-4	neutrophil activation
3	GO:0030888	6/134	52/13778	11.86	1.07E-5	1.02E-4	regulation of B cell proliferation
3	GO:0016477	18/134	573/13778	3.23	1.09E-5	1.03E-4	cell migration
3	GO:0008544	15/134	411/13778	3.75	1.09E-5	1.03E-4	epidermis development
3	GO:0002920	5/134	31/13778	16.58	1.12E-5	1.05E-4	regulation of humoral immune response
3	GO:0050777	6/134	53/13778	11.64	1.19E-5	1.12E-4	negative regulation of immune response
3	GO:0032729	5/134	32/13778	16.07	1.32E-5	1.23E-4	positive regulation of interferon-gamma production
3	GO:0046651	6/134	54/13778	11.42	1.33E-5	1.24E-4	lymphocyte proliferation
3	GO:0043372	4/134	16/13778	25.71	1.42E-5	1.32E-4	positive regulation of CD4-positive, alpha-beta T cell differentiation
3	GO:0002889	5/134	33/13778	15.58	1.54E-5	1.42E-4	regulation of immunoglobulin mediated immune response
3	GO:0030099	9/134	151/13778	6.13	1.64E-5	1.50E-4	myeloid cell differentiation
3	GO:0050871	6/134	56/13778	11.02	1.65E-5	1.50E-4	positive regulation of B cell activation
3	GO:0032943	6/134	56/13778	11.02	1.65E-5	1.50E-4	mononuclear cell proliferation
3	GO:0052031	3/134	6/13778	51.41	1.76E-5	1.58E-4	modulation by symbiont of host defense response
3	GO:0050855	3/134	6/13778	51.41	1.76E-5	1.58E-4	regulation of B cell receptor signaling pathway
3	GO:0052509	3/134	6/13778	51.41	1.76E-5	1.58E-4	positive regulation by symbiont of host defense response
3	GO:0052510	3/134	6/13778	51.41	1.76E-5	1.58E-4	positive regulation by organism of defense response of other organism involved in symbiotic interaction
3	GO:0052255	3/134	6/13778	51.41	1.76E-5	1.58E-4	modulation by organism of defense response of other organism involved in symbiotic interaction
3	GO:0009620	5/134	34/13778	15.12	1.79E-5	1.60E-4	response to fungus
3	GO:0050848	5/134	35/13778	14.69	2.07E-5	1.84E-4	regulation of calcium-mediated signaling
3	GO:0002820	4/134	18/13778	22.85	2.35E-5	2.07E-4	negative regulation of adaptive immune response
3	GO:0043304	4/134	18/13778	22.85	2.35E-5	2.07E-4	regulation of mast cell degranulation
3	GO:2000516	4/134	18/13778	22.85	2.35E-5	2.07E-4	positive regulation of CD4-positive, alpha-beta T cell activation
3	GO:0002688	6/134	60/13778	10.28	2.46E-5	2.15E-4	regulation of leukocyte chemotaxis
3	GO:0070661	6/134	60/13778	10.28	2.46E-5	2.15E-4	leukocyte proliferation
3	GO:0071396	11/134	243/13778	4.65	2.50E-5	2.16E-4	cellular response to lipid
3	GO:0023056	21/134	792/13778	2.73	2.49E-5	2.16E-4	positive regulation of signaling
3	GO:0010647	21/134	793/13778	2.72	2.54E-5	2.19E-4	positive regulation of cell communication
3	GO:0051094	19/134	671/13778	2.91	2.60E-5	2.23E-4	positive regulation of developmental process
3	GO:0001816	7/134	91/13778	7.91	2.89E-5	2.47E-4	cytokine production
3	GO:0001773	4/134	19/13778	21.65	2.96E-5	2.51E-4	myeloid dendritic cell activation
3	GO:0045061	4/134	19/13778	21.65	2.96E-5	2.51E-4	thymic T cell selection
3	GO:0033006	4/134	19/13778	21.65	2.96E-5	2.51E-4	regulation of mast cell activation involved in immune response
3	GO:0001818	8/134	126/13778	6.53	3.11E-5	2.63E-4	negative regulation of cytokine production
3	GO:0048870	18/134	625/13778	2.96	3.46E-5	2.90E-4	cell motility
3	GO:0051674	18/134	625/13778	2.96	3.46E-5	2.90E-4	localization of cell
3	GO:0046640	4/134	20/13778	20.56	3.67E-5	3.07E-4	regulation of alpha-beta T cell proliferation
3	GO:0007155	20/134	751/13778	2.74	3.74E-5	3.11E-4	cell adhesion
3	GO:0050868	6/134	65/13778	9.49	3.90E-5	3.21E-4	negative regulation of T cell activation
3	GO:0046903	15/134	458/13778	3.37	3.87E-5	3.21E-4	secretion
3	GO:0018108	6/134	65/13778	9.49	3.90E-5	3.21E-4	peptidyl-tyrosine phosphorylation
3	GO:0022610	20/134	753/13778	2.73	3.88E-5	3.21E-4	biological adhesion
3	GO:0046637	5/134	40/13778	12.85	4.04E-5	3.31E-4	regulation of alpha-beta T cell differentiation
3	GO:0032956	9/134	170/13778	5.44	4.18E-5	3.41E-4	regulation of actin cytoskeleton organization
3	GO:0032757	4/134	21/13778	19.58	4.50E-5	3.66E-4	positive regulation of interleukin-8 production
3	GO:0018212	6/134	67/13778	9.21	4.64E-5	3.76E-4	peptidyl-tyrosine modification
3	GO:0052564	3/134	8/13778	38.56	4.86E-5	3.89E-4	response to immune response of other organism involved in symbiotic interaction
3	GO:0061081	3/134	8/13778	38.56	4.86E-5	3.89E-4	positive regulation of myeloid leukocyte cytokine production involved in immune response
3	GO:0052572	3/134	8/13778	38.56	4.86E-5	3.89E-4	response to host immune response
3	GO:0050665	3/134	8/13778	38.56	4.86E-5	3.89E-4	hydrogen peroxide biosynthetic process
3	GO:0032675	6/134	68/13778	9.07	5.05E-5	4.03E-4	regulation of interleukin-6 production
3	GO:0032677	5/134	42/13778	12.24	5.14E-5	4.09E-4	regulation of interleukin-8 production
3	GO:0009595	4/134	22/13778	18.69	5.46E-5	4.33E-4	detection of biotic stimulus
3	GO:0010543	4/134	23/13778	17.88	6.56E-5	5.15E-4	regulation of platelet activation
3	GO:0043300	4/134	23/13778	17.88	6.56E-5	5.15E-4	regulation of leukocyte degranulation
3	GO:0051223	11/134	270/13778	4.19	6.53E-5	5.15E-4	regulation of protein transport
3	GO:0019220	28/134	1330/13778	2.16	6.63E-5	5.18E-4	regulation of phosphate metabolic process
3	GO:0045579	3/134	9/13778	34.27	7.24E-5	5.61E-4	positive regulation of B cell differentiation
3	GO:0002705	5/134	45/13778	11.42	7.22E-5	5.61E-4	positive regulation of leukocyte mediated immunity
3	GO:0002708	5/134	45/13778	11.42	7.22E-5	5.61E-4	positive regulation of lymphocyte mediated immunity
3	GO:0002479	6/134	73/13778	8.45	7.55E-5	5.83E-4	antigen processing and presentation of exogenous peptide antigen via MHC class I, TAP-dependent
3	GO:0009966	34/134	1791/13778	1.95	7.59E-5	5.84E-4	regulation of signal transduction
3	GO:0051174	28/134	1342/13778	2.15	7.76E-5	5.95E-4	regulation of phosphorus metabolic process
3	GO:0050850	4/134	24/13778	17.14	7.82E-5	5.98E-4	positive regulation of calcium-mediated signaling
3	GO:0030217	7/134	107/13778	6.73	8.18E-5	6.23E-4	T cell differentiation
3	GO:0002540	2/134	2/13778	102.82	9.39E-5	6.88E-4	leukotriene production involved in inflammatory response
3	GO:0002538	2/134	2/13778	102.82	9.39E-5	6.88E-4	arachidonic acid metabolite production involved in inflammatory response
3	GO:0002431	2/134	2/13778	102.82	9.39E-5	6.88E-4	Fc receptor mediated stimulatory signaling pathway
3	GO:0002894	2/134	2/13778	102.82	9.39E-5	6.88E-4	positive regulation of type II hypersensitivity
3	GO:0002892	2/134	2/13778	102.82	9.39E-5	6.88E-4	regulation of type II hypersensitivity
3	GO:0002888	2/134	2/13778	102.82	9.39E-5	6.88E-4	positive regulation of myeloid leukocyte mediated immunity
3	GO:0001798	2/134	2/13778	102.82	9.39E-5	6.88E-4	positive regulation of type IIa hypersensitivity
3	GO:0001796	2/134	2/13778	102.82	9.39E-5	6.88E-4	regulation of type IIa hypersensitivity
3	GO:0002277	2/134	2/13778	102.82	9.39E-5	6.88E-4	myeloid dendritic cell activation involved in immune response
3	GO:0002752	2/134	2/13778	102.82	9.39E-5	6.88E-4	cell surface pattern recognition receptor signaling pathway
3	GO:0042495	2/134	2/13778	102.82	9.39E-5	6.88E-4	detection of triacyl bacterial lipopeptide
3	GO:0071725	2/134	2/13778	102.82	9.39E-5	6.88E-4	response to triacyl bacterial lipopeptide
3	GO:0071727	2/134	2/13778	102.82	9.39E-5	6.88E-4	cellular response to triacyl bacterial lipopeptide
3	GO:0050729	6/134	76/13778	8.12	9.47E-5	6.91E-4	positive regulation of inflammatory response
3	GO:0045597	15/134	497/13778	3.10	9.75E-5	7.09E-4	positive regulation of cell differentiation
3	GO:0032970	9/134	190/13778	4.87	9.89E-5	7.18E-4	regulation of actin filament-based process
3	GO:0002923	3/134	10/13778	30.85	1.03E-4	7.28E-4	regulation of humoral immune response mediated by circulating immunoglobulin
3	GO:0075136	3/134	10/13778	30.85	1.03E-4	7.28E-4	response to host
3	GO:0001774	3/134	10/13778	30.85	1.03E-4	7.28E-4	microglial cell activation
3	GO:0043306	3/134	10/13778	30.85	1.03E-4	7.28E-4	positive regulation of mast cell degranulation
3	GO:0052173	3/134	10/13778	30.85	1.03E-4	7.28E-4	response to defenses of other organism involved in symbiotic interaction
3	GO:0052200	3/134	10/13778	30.85	1.03E-4	7.28E-4	response to host defenses
3	GO:0002579	3/134	10/13778	30.85	1.03E-4	7.28E-4	positive regulation of antigen processing and presentation
3	GO:0033008	3/134	10/13778	30.85	1.03E-4	7.28E-4	positive regulation of mast cell activation involved in immune response
3	GO:0051179	56/134	3686/13778	1.56	1.09E-4	7.68E-4	localization
3	GO:0070372	7/134	113/13778	6.37	1.15E-4	8.13E-4	regulation of ERK1 and ERK2 cascade
3	GO:0006810	48/134	2991/13778	1.65	1.21E-4	8.53E-4	transport
3	GO:0002285	5/134	51/13778	10.08	1.32E-4	9.28E-4	lymphocyte activation involved in immune response
3	GO:0002576	6/134	81/13778	7.62	1.35E-4	9.43E-4	platelet degranulation
3	GO:0043302	3/134	11/13778	28.04	1.40E-4	9.76E-4	positive regulation of leukocyte degranulation
3	GO:0070201	11/134	295/13778	3.83	1.43E-4	9.95E-4	regulation of establishment of protein localization
3	GO:0050854	4/134	28/13778	14.69	1.46E-4	1.01E-3	regulation of antigen receptor-mediated signaling pathway
3	GO:0043370	4/134	28/13778	14.69	1.46E-4	1.01E-3	regulation of CD4-positive, alpha-beta T cell differentiation
3	GO:0002690	5/134	52/13778	9.89	1.45E-4	1.01E-3	positive regulation of leukocyte chemotaxis
3	GO:0030168	9/134	203/13778	4.56	1.63E-4	1.12E-3	platelet activation
3	GO:0030334	13/134	407/13778	3.28	1.67E-4	1.14E-3	regulation of cell migration
3	GO:0002922	3/134	12/13778	25.71	1.86E-4	1.25E-3	positive regulation of humoral immune response
3	GO:0043383	3/134	12/13778	25.71	1.86E-4	1.25E-3	negative T cell selection
3	GO:0023051	36/134	2032/13778	1.82	1.83E-4	1.25E-3	regulation of signaling
3	GO:0045060	3/134	12/13778	25.71	1.86E-4	1.25E-3	negative thymic T cell selection
3	GO:0051234	48/134	3041/13778	1.62	1.85E-4	1.25E-3	establishment of localization
3	GO:0002577	3/134	12/13778	25.71	1.86E-4	1.25E-3	regulation of antigen processing and presentation
3	GO:0033005	3/134	12/13778	25.71	1.86E-4	1.25E-3	positive regulation of mast cell activation
3	GO:0050715	5/134	55/13778	9.35	1.90E-4	1.27E-3	positive regulation of cytokine secretion
3	GO:0002286	4/134	30/13778	13.71	1.93E-4	1.28E-3	T cell activation involved in immune response
3	GO:0032648	4/134	30/13778	13.71	1.93E-4	1.28E-3	regulation of interferon-beta production
3	GO:0006691	4/134	30/13778	13.71	1.93E-4	1.28E-3	leukotriene metabolic process
3	GO:2000514	4/134	30/13778	13.71	1.93E-4	1.28E-3	regulation of CD4-positive, alpha-beta T cell activation
3	GO:0010646	36/134	2039/13778	1.82	1.96E-4	1.29E-3	regulation of cell communication
3	GO:0051130	14/134	473/13778	3.04	2.06E-4	1.36E-3	positive regulation of cellular component organization
3	GO:0008064	6/134	88/13778	7.01	2.13E-4	1.40E-3	regulation of actin polymerization or depolymerization
3	GO:0006801	4/134	31/13778	13.27	2.20E-4	1.44E-3	superoxide metabolic process
3	GO:0006968	5/134	57/13778	9.02	2.25E-4	1.47E-3	cellular defense response
3	GO:0030832	6/134	89/13778	6.93	2.27E-4	1.48E-3	regulation of actin filament length
3	GO:0043900	27/134	1355/13778	2.05	2.29E-4	1.49E-3	regulation of multi-organism process
3	GO:0030225	3/134	13/13778	23.73	2.40E-4	1.55E-3	macrophage differentiation
3	GO:0042832	3/134	13/13778	23.73	2.40E-4	1.55E-3	defense response to protozoan
3	GO:0035821	5/134	58/13778	8.86	2.45E-4	1.58E-3	modification of morphology or physiology of other organism
3	GO:0002455	4/134	32/13778	12.85	2.49E-4	1.60E-3	humoral immune response mediated by circulating immunoglobulin
3	GO:0032755	4/134	32/13778	12.85	2.49E-4	1.60E-3	positive regulation of interleukin-6 production
3	GO:0035556	26/134	1290/13778	2.07	2.55E-4	1.63E-3	intracellular signal transduction
3	GO:0030155	10/134	264/13778	3.89	2.55E-4	1.63E-3	regulation of cell adhesion
3	GO:0033993	16/134	606/13778	2.71	2.63E-4	1.68E-3	response to lipid
3	GO:0002441	2/134	3/13778	68.55	2.80E-4	1.73E-3	histamine secretion involved in inflammatory response
3	GO:0002442	2/134	3/13778	68.55	2.80E-4	1.73E-3	serotonin secretion involved in inflammatory response
3	GO:0002220	2/134	3/13778	68.55	2.80E-4	1.73E-3	innate immune response activating cell surface receptor signaling pathway
3	GO:0002349	2/134	3/13778	68.55	2.80E-4	1.73E-3	histamine production involved in inflammatory response
3	GO:0002351	2/134	3/13778	68.55	2.80E-4	1.73E-3	serotonin production involved in inflammatory response
3	GO:0070340	2/134	3/13778	68.55	2.80E-4	1.73E-3	detection of bacterial lipopeptide
3	GO:0002774	2/134	3/13778	68.55	2.80E-4	1.73E-3	Fc receptor mediated inhibitory signaling pathway
3	GO:0032688	2/134	3/13778	68.55	2.80E-4	1.73E-3	negative regulation of interferon-beta production
3	GO:0042494	2/134	3/13778	68.55	2.80E-4	1.73E-3	detection of bacterial lipoprotein
3	GO:0002554	2/134	3/13778	68.55	2.80E-4	1.73E-3	serotonin secretion by platelet
3	GO:0002553	2/134	3/13778	68.55	2.80E-4	1.73E-3	histamine secretion by mast cell
3	GO:2000145	13/134	430/13778	3.11	2.86E-4	1.76E-3	regulation of cell motility
3	GO:0051246	28/134	1451/13778	1.98	2.92E-4	1.80E-3	regulation of protein metabolic process
3	GO:0048513	39/134	2329/13778	1.72	2.97E-4	1.82E-3	organ development
3	GO:0051047	9/134	220/13778	4.21	2.98E-4	1.82E-3	positive regulation of secretion
3	GO:0045637	7/134	132/13778	5.45	3.02E-4	1.84E-3	regulation of myeloid cell differentiation
3	GO:0016045	3/134	14/13778	22.03	3.03E-4	1.84E-3	detection of bacterium
3	GO:0090025	3/134	14/13778	22.03	3.03E-4	1.84E-3	regulation of monocyte chemotaxis
3	GO:0030183	5/134	61/13778	8.43	3.10E-4	1.88E-3	B cell differentiation
3	GO:0030838	4/134	34/13778	12.10	3.16E-4	1.91E-3	positive regulation of actin filament polymerization
3	GO:0051495	6/134	95/13778	6.49	3.24E-4	1.95E-3	positive regulation of cytoskeleton organization
3	GO:0051046	13/134	436/13778	3.07	3.26E-4	1.96E-3	regulation of secretion
3	GO:1900046	5/134	62/13778	8.29	3.35E-4	2.00E-3	regulation of hemostasis
3	GO:0030193	5/134	62/13778	8.29	3.35E-4	2.00E-3	regulation of blood coagulation
3	GO:0006928	20/134	883/13778	2.33	3.35E-4	2.00E-3	cellular component movement
3	GO:0050830	4/134	35/13778	11.75	3.54E-4	2.11E-3	defense response to Gram-positive bacterium
3	GO:0002704	3/134	15/13778	20.56	3.76E-4	2.21E-3	negative regulation of leukocyte mediated immunity
3	GO:0002707	3/134	15/13778	20.56	3.76E-4	2.21E-3	negative regulation of lymphocyte mediated immunity
3	GO:0044707	70/134	5181/13778	1.39	3.74E-4	2.21E-3	single-multicellular organism process
3	GO:0001562	3/134	15/13778	20.56	3.76E-4	2.21E-3	response to protozoan
3	GO:0042088	3/134	15/13778	20.56	3.76E-4	2.21E-3	T-helper 1 type immune response
3	GO:0007243	12/134	390/13778	3.16	4.21E-4	2.47E-3	intracellular protein kinase cascade
3	GO:0044093	25/134	1258/13778	2.04	4.24E-4	2.48E-3	positive regulation of molecular function
3	GO:0033628	4/134	37/13778	11.12	4.40E-4	2.57E-3	regulation of cell adhesion mediated by integrin
3	GO:0002902	3/134	16/13778	19.28	4.59E-4	2.64E-3	regulation of B cell apoptotic process
3	GO:0002823	3/134	16/13778	19.28	4.59E-4	2.64E-3	negative regulation of adaptive immune response based on somatic recombination of immune receptors built from immunoglobulin superfamily domains
3	GO:0045072	3/134	16/13778	19.28	4.59E-4	2.64E-3	regulation of interferon-gamma biosynthetic process
3	GO:0046457	3/134	16/13778	19.28	4.59E-4	2.64E-3	prostanoid biosynthetic process
3	GO:0001516	3/134	16/13778	19.28	4.59E-4	2.64E-3	prostaglandin biosynthetic process
3	GO:0042534	3/134	16/13778	19.28	4.59E-4	2.64E-3	regulation of tumor necrosis factor biosynthetic process
3	GO:0032501	70/134	5214/13778	1.38	4.61E-4	2.65E-3	multicellular organismal process
3	GO:0030890	4/134	38/13778	10.82	4.89E-4	2.80E-3	positive regulation of B cell proliferation
3	GO:0048872	7/134	143/13778	5.03	4.91E-4	2.81E-3	homeostasis of number of cells
3	GO:0051128	24/134	1198/13778	2.06	5.01E-4	2.86E-3	regulation of cellular component organization
3	GO:0032880	11/134	342/13778	3.31	5.08E-4	2.89E-3	regulation of protein localization
3	GO:0050818	5/134	68/13778	7.56	5.15E-4	2.92E-3	regulation of coagulation
3	GO:0052033	2/134	4/13778	51.41	5.56E-4	3.02E-3	pathogen-associated molecular pattern dependent induction by symbiont of host innate immune response
3	GO:0050829	3/134	17/13778	18.14	5.54E-4	3.02E-3	defense response to Gram-negative bacterium
3	GO:2000668	2/134	4/13778	51.41	5.56E-4	3.02E-3	regulation of dendritic cell apoptotic process
3	GO:0032959	2/134	4/13778	51.41	5.56E-4	3.02E-3	inositol trisphosphate biosynthetic process
3	GO:0010562	16/134	648/13778	2.54	5.52E-4	3.02E-3	positive regulation of phosphorus metabolic process
3	GO:0052169	2/134	4/13778	51.41	5.56E-4	3.02E-3	pathogen-associated molecular pattern dependent modulation by symbiont of host innate immune response
3	GO:0052166	2/134	4/13778	51.41	5.56E-4	3.02E-3	positive regulation by symbiont of host innate immune response
3	GO:0052167	2/134	4/13778	51.41	5.56E-4	3.02E-3	modulation by symbiont of host innate immune response
3	GO:0002309	2/134	4/13778	51.41	5.56E-4	3.02E-3	T cell proliferation involved in immune response
3	GO:0045937	16/134	648/13778	2.54	5.52E-4	3.02E-3	positive regulation of phosphate metabolic process
3	GO:0090023	3/134	17/13778	18.14	5.54E-4	3.02E-3	positive regulation of neutrophil chemotaxis
3	GO:0052257	2/134	4/13778	51.41	5.56E-4	3.02E-3	pathogen-associated molecular pattern dependent induction by organism of innate immune response of other organism involved in symbiotic interaction
3	GO:0044351	2/134	4/13778	51.41	5.56E-4	3.02E-3	macropinocytosis
3	GO:2001185	2/134	4/13778	51.41	5.56E-4	3.02E-3	regulation of CD8-positive, alpha-beta T cell activation
3	GO:0006956	4/134	39/13778	10.55	5.40E-4	3.02E-3	complement activation
3	GO:0001915	2/134	4/13778	51.41	5.56E-4	3.02E-3	negative regulation of T cell mediated cytotoxicity
3	GO:0052306	2/134	4/13778	51.41	5.56E-4	3.02E-3	modulation by organism of innate immune response in other organism involved in symbiotic interaction
3	GO:0052308	2/134	4/13778	51.41	5.56E-4	3.02E-3	pathogen-associated molecular pattern dependent modulation by organism of innate immune response in other organism involved in symbiotic interaction
3	GO:0052305	2/134	4/13778	51.41	5.56E-4	3.02E-3	positive regulation by organism of innate immune response in other organism involved in symbiotic interaction
3	GO:0043085	22/134	1059/13778	2.14	5.44E-4	3.02E-3	positive regulation of catalytic activity
3	GO:0040012	13/134	462/13778	2.89	5.65E-4	3.06E-3	regulation of locomotion
3	GO:0050920	6/134	106/13778	5.82	5.82E-4	3.14E-3	regulation of chemotaxis
3	GO:0002260	4/134	40/13778	10.28	5.96E-4	3.20E-3	lymphocyte homeostasis
3	GO:0042130	4/134	40/13778	10.28	5.96E-4	3.20E-3	negative regulation of T cell proliferation
3	GO:0051649	25/134	1291/13778	1.99	6.22E-4	3.34E-3	establishment of localization in cell
3	GO:0032663	4/134	41/13778	10.03	6.55E-4	3.51E-3	regulation of interleukin-2 production
3	GO:0010575	3/134	18/13778	17.14	6.60E-4	3.51E-3	positive regulation vascular endothelial growth factor production
3	GO:0032660	3/134	18/13778	17.14	6.60E-4	3.51E-3	regulation of interleukin-17 production
3	GO:0051270	13/134	471/13778	2.84	6.76E-4	3.60E-3	regulation of cellular component movement
3	GO:2000026	22/134	1081/13778	2.09	7.18E-4	3.81E-3	regulation of multicellular organismal development
3	GO:0031529	3/134	19/13778	16.23	7.78E-4	4.12E-3	ruffle organization
3	GO:0051247	19/134	875/13778	2.23	7.99E-4	4.22E-3	positive regulation of protein metabolic process
3	GO:0002573	5/134	76/13778	6.76	8.58E-4	4.52E-3	myeloid leukocyte differentiation
3	GO:0043902	14/134	547/13778	2.63	8.79E-4	4.62E-3	positive regulation of multi-organism process
3	GO:0032673	3/134	20/13778	15.42	9.08E-4	4.77E-3	regulation of interleukin-4 production
3	GO:0030833	5/134	77/13778	6.68	9.11E-4	4.77E-3	regulation of actin filament polymerization
3	GO:0001820	2/134	5/13778	41.13	9.21E-4	4.77E-3	serotonin secretion
3	GO:0001878	2/134	5/13778	41.13	9.21E-4	4.77E-3	response to yeast
3	GO:0002282	2/134	5/13778	41.13	9.21E-4	4.77E-3	microglial cell activation involved in immune response
3	GO:0002767	2/134	5/13778	41.13	9.21E-4	4.77E-3	immune response-inhibiting cell surface receptor signaling pathway
3	GO:0002679	2/134	5/13778	41.13	9.21E-4	4.77E-3	respiratory burst involved in defense response
3	GO:0051493	9/134	259/13778	3.57	9.65E-4	4.99E-3	regulation of cytoskeleton organization
3	GO:0051817	4/134	46/13778	8.94	1.02E-3	5.23E-3	modification of morphology or physiology of other organism involved in symbiotic interaction
3	GO:0050921	5/134	79/13778	6.51	1.02E-3	5.23E-3	positive regulation of chemotaxis
3	GO:2000106	4/134	46/13778	8.94	1.02E-3	5.23E-3	regulation of leukocyte apoptotic process
3	GO:0006633	6/134	118/13778	5.23	1.02E-3	5.23E-3	fatty acid biosynthetic process
3	GO:0050731	6/134	118/13778	5.23	1.02E-3	5.23E-3	positive regulation of peptidyl-tyrosine phosphorylation
3	GO:0002861	3/134	21/13778	14.69	1.05E-3	5.35E-3	regulation of inflammatory response to antigenic stimulus
3	GO:0090022	3/134	21/13778	14.69	1.05E-3	5.35E-3	regulation of neutrophil chemotaxis
3	GO:0032689	3/134	21/13778	14.69	1.05E-3	5.35E-3	negative regulation of interferon-gamma production
3	GO:0061041	5/134	80/13778	6.43	1.08E-3	5.49E-3	regulation of wound healing
3	GO:0033077	4/134	47/13778	8.75	1.10E-3	5.57E-3	T cell differentiation in thymus
3	GO:0032273	4/134	47/13778	8.75	1.10E-3	5.57E-3	positive regulation of protein polymerization
3	GO:0001776	4/134	48/13778	8.57	1.19E-3	6.02E-3	leukocyte homeostasis
3	GO:0036296	3/134	22/13778	14.02	1.21E-3	6.05E-3	response to increased oxygen levels
3	GO:0010574	3/134	22/13778	14.02	1.21E-3	6.05E-3	regulation of vascular endothelial growth factor production
3	GO:0044003	3/134	22/13778	14.02	1.21E-3	6.05E-3	modification by symbiont of host morphology or physiology
3	GO:0055093	3/134	22/13778	14.02	1.21E-3	6.05E-3	response to hyperoxia
3	GO:0051704	59/134	4316/13778	1.41	1.28E-3	6.36E-3	multi-organism process
3	GO:0050714	5/134	83/13778	6.19	1.28E-3	6.36E-3	positive regulation of protein secretion
3	GO:0051641	27/134	1514/13778	1.83	1.29E-3	6.39E-3	cellular localization
3	GO:0001932	18/134	840/13778	2.20	1.29E-3	6.39E-3	regulation of protein phosphorylation
3	GO:0048519	44/134	2944/13778	1.54	1.31E-3	6.48E-3	negative regulation of biological process
3	GO:0032493	2/134	6/13778	34.27	1.37E-3	6.66E-3	response to bacterial lipoprotein
3	GO:0002885	2/134	6/13778	34.27	1.37E-3	6.66E-3	positive regulation of hypersensitivity
3	GO:0060907	2/134	6/13778	34.27	1.37E-3	6.66E-3	positive regulation of macrophage cytokine production
3	GO:0070339	2/134	6/13778	34.27	1.37E-3	6.66E-3	response to bacterial lipopeptide
3	GO:0032623	2/134	6/13778	34.27	1.37E-3	6.66E-3	interleukin-2 production
3	GO:0002765	2/134	6/13778	34.27	1.37E-3	6.66E-3	immune response-inhibiting signal transduction
3	GO:0071220	2/134	6/13778	34.27	1.37E-3	6.66E-3	cellular response to bacterial lipoprotein
3	GO:0071221	2/134	6/13778	34.27	1.37E-3	6.66E-3	cellular response to bacterial lipopeptide
3	GO:0050798	2/134	6/13778	34.27	1.37E-3	6.66E-3	activated T cell proliferation
3	GO:0001911	2/134	6/13778	34.27	1.37E-3	6.66E-3	negative regulation of leukocyte mediated cytotoxicity
3	GO:0006692	3/134	24/13778	12.85	1.57E-3	7.57E-3	prostanoid metabolic process
3	GO:0006693	3/134	24/13778	12.85	1.57E-3	7.57E-3	prostaglandin metabolic process
3	GO:0007249	4/134	52/13778	7.91	1.61E-3	7.78E-3	I-kappaB kinase/NF-kappaB cascade
3	GO:0031334	5/134	89/13778	5.78	1.74E-3	8.37E-3	positive regulation of protein complex assembly
3	GO:0031348	5/134	89/13778	5.78	1.74E-3	8.37E-3	negative regulation of defense response
3	GO:0051607	6/134	131/13778	4.71	1.75E-3	8.39E-3	defense response to virus
3	GO:0050869	3/134	25/13778	12.34	1.77E-3	8.41E-3	negative regulation of B cell activation
3	GO:0043029	3/134	25/13778	12.34	1.77E-3	8.41E-3	T cell homeostasis
3	GO:0050663	3/134	25/13778	12.34	1.77E-3	8.41E-3	cytokine secretion
3	GO:0019370	3/134	25/13778	12.34	1.77E-3	8.41E-3	leukotriene biosynthetic process
3	GO:0071260	4/134	54/13778	7.62	1.86E-3	8.81E-3	cellular response to mechanical stimulus
3	GO:0001821	2/134	7/13778	29.38	1.91E-3	8.92E-3	histamine secretion
3	GO:0002507	2/134	7/13778	29.38	1.91E-3	8.92E-3	tolerance induction
3	GO:0002925	2/134	7/13778	29.38	1.91E-3	8.92E-3	positive regulation of humoral immune response mediated by circulating immunoglobulin
3	GO:0032957	2/134	7/13778	29.38	1.91E-3	8.92E-3	inositol trisphosphate metabolic process
3	GO:0032958	2/134	7/13778	29.38	1.91E-3	8.92E-3	inositol phosphate biosynthetic process
3	GO:0090197	2/134	7/13778	29.38	1.91E-3	8.92E-3	positive regulation of chemokine secretion
3	GO:0002866	2/134	7/13778	29.38	1.91E-3	8.92E-3	positive regulation of acute inflammatory response to antigenic stimulus
3	GO:0031342	2/134	7/13778	29.38	1.91E-3	8.92E-3	negative regulation of cell killing
3	GO:0009306	4/134	55/13778	7.48	1.99E-3	9.27E-3	protein secretion
3	GO:0009581	5/134	92/13778	5.59	2.02E-3	9.37E-3	detection of external stimulus
3	GO:0048520	5/134	92/13778	5.59	2.02E-3	9.37E-3	positive regulation of behavior
3	GO:0002244	3/134	27/13778	11.42	2.22E-3	1.02E-2	hematopoietic progenitor cell differentiation
3	GO:0050690	3/134	27/13778	11.42	2.22E-3	1.02E-2	regulation of defense response to virus by virus
3	GO:0006958	3/134	27/13778	11.42	2.22E-3	1.02E-2	complement activation, classical pathway
3	GO:0019722	4/134	57/13778	7.22	2.27E-3	1.05E-2	calcium-mediated signaling
3	GO:0030036	9/134	296/13778	3.13	2.42E-3	1.11E-2	actin cytoskeleton organization
3	GO:0032490	2/134	8/13778	25.71	2.53E-3	1.14E-2	detection of molecule of bacterial origin
3	GO:0032928	2/134	8/13778	25.71	2.53E-3	1.14E-2	regulation of superoxide anion generation
3	GO:0090196	2/134	8/13778	25.71	2.53E-3	1.14E-2	regulation of chemokine secretion
3	GO:0002883	2/134	8/13778	25.71	2.53E-3	1.14E-2	regulation of hypersensitivity
3	GO:0070391	2/134	8/13778	25.71	2.53E-3	1.14E-2	response to lipoteichoic acid
3	GO:0071223	2/134	8/13778	25.71	2.53E-3	1.14E-2	cellular response to lipoteichoic acid
3	GO:0051608	2/134	8/13778	25.71	2.53E-3	1.14E-2	histamine transport
3	GO:0010627	15/134	680/13778	2.27	2.51E-3	1.14E-2	regulation of intracellular protein kinase cascade
3	GO:0090330	2/134	8/13778	25.71	2.53E-3	1.14E-2	regulation of platelet aggregation
3	GO:0002639	2/134	8/13778	25.71	2.53E-3	1.14E-2	positive regulation of immunoglobulin production
3	GO:0002606	2/134	8/13778	25.71	2.53E-3	1.14E-2	positive regulation of dendritic cell antigen processing and presentation
3	GO:0032700	2/134	8/13778	25.71	2.53E-3	1.14E-2	negative regulation of interleukin-17 production
3	GO:0050795	6/134	141/13778	4.38	2.54E-3	1.14E-2	regulation of behavior
3	GO:0072376	4/134	59/13778	6.97	2.57E-3	1.15E-2	protein activation cascade
3	GO:0008277	5/134	98/13778	5.25	2.66E-3	1.19E-2	regulation of G-protein coupled receptor protein signaling pathway
3	GO:0032271	5/134	98/13778	5.25	2.66E-3	1.19E-2	regulation of protein polymerization
3	GO:0042325	18/134	898/13778	2.06	2.68E-3	1.20E-2	regulation of phosphorylation
3	GO:0050732	3/134	29/13778	10.64	2.73E-3	1.22E-2	negative regulation of peptidyl-tyrosine phosphorylation
3	GO:0050688	4/134	60/13778	6.85	2.74E-3	1.22E-2	regulation of defense response to virus
3	GO:0010740	10/134	361/13778	2.85	2.77E-3	1.23E-2	positive regulation of intracellular protein kinase cascade
3	GO:0045595	19/134	979/13778	2.00	2.92E-3	1.29E-2	regulation of cell differentiation
3	GO:0045646	3/134	30/13778	10.28	3.01E-3	1.32E-2	regulation of erythrocyte differentiation
3	GO:0070228	3/134	30/13778	10.28	3.01E-3	1.32E-2	regulation of lymphocyte apoptotic process
3	GO:0034121	3/134	30/13778	10.28	3.01E-3	1.32E-2	regulation of toll-like receptor signaling pathway
3	GO:0042743	3/134	30/13778	10.28	3.01E-3	1.32E-2	hydrogen peroxide metabolic process
3	GO:0019932	5/134	101/13778	5.09	3.03E-3	1.33E-2	second-messenger-mediated signaling
3	GO:0048731	46/134	3248/13778	1.46	3.04E-3	1.33E-2	system development
3	GO:0043065	11/134	428/13778	2.64	3.06E-3	1.34E-2	positive regulation of apoptotic process
3	GO:0048585	16/134	767/13778	2.14	3.16E-3	1.38E-2	negative regulation of response to stimulus
3	GO:0006837	2/134	9/13778	22.85	3.23E-3	1.40E-2	serotonin transport
3	GO:0045986	2/134	9/13778	22.85	3.23E-3	1.40E-2	negative regulation of smooth muscle contraction
3	GO:0002604	2/134	9/13778	22.85	3.23E-3	1.40E-2	regulation of dendritic cell antigen processing and presentation
3	GO:0006907	2/134	9/13778	22.85	3.23E-3	1.40E-2	pinocytosis
3	GO:0030218	4/134	63/13778	6.53	3.27E-3	1.41E-2	erythrocyte differentiation
3	GO:0051283	3/134	31/13778	9.95	3.31E-3	1.42E-2	negative regulation of sequestering of calcium ion
3	GO:0051209	3/134	31/13778	9.95	3.31E-3	1.42E-2	release of sequestered calcium ion into cytosol
3	GO:0008360	5/134	103/13778	4.99	3.30E-3	1.42E-2	regulation of cell shape
3	GO:0001934	13/134	563/13778	2.37	3.32E-3	1.42E-2	positive regulation of protein phosphorylation
3	GO:0006631	8/134	255/13778	3.23	3.47E-3	1.48E-2	fatty acid metabolic process
3	GO:0043068	11/134	435/13778	2.60	3.46E-3	1.48E-2	positive regulation of programmed cell death
3	GO:0008283	13/134	569/13778	2.35	3.63E-3	1.54E-2	cell proliferation
3	GO:0051282	3/134	32/13778	9.64	3.63E-3	1.54E-2	regulation of sequestering of calcium ion
3	GO:0001906	3/134	32/13778	9.64	3.63E-3	1.54E-2	cell killing
3	GO:0031325	30/134	1882/13778	1.64	3.84E-3	1.63E-2	positive regulation of cellular metabolic process
3	GO:0032479	4/134	66/13778	6.23	3.87E-3	1.64E-2	regulation of type I interferon production
3	GO:0030279	3/134	33/13778	9.35	3.97E-3	1.67E-2	negative regulation of ossification
3	GO:0002637	3/134	33/13778	9.35	3.97E-3	1.67E-2	regulation of immunoglobulin production
3	GO:0001910	3/134	33/13778	9.35	3.97E-3	1.67E-2	regulation of leukocyte mediated cytotoxicity
3	GO:0051085	2/134	10/13778	20.56	4.01E-3	1.67E-2	chaperone mediated protein folding requiring cofactor
3	GO:0010935	2/134	10/13778	20.56	4.01E-3	1.67E-2	regulation of macrophage cytokine production
3	GO:0002863	2/134	10/13778	20.56	4.01E-3	1.67E-2	positive regulation of inflammatory response to antigenic stimulus
3	GO:0002864	2/134	10/13778	20.56	4.01E-3	1.67E-2	regulation of acute inflammatory response to antigenic stimulus
3	GO:0090026	2/134	10/13778	20.56	4.01E-3	1.67E-2	positive regulation of monocyte chemotaxis
3	GO:0032645	2/134	10/13778	20.56	4.01E-3	1.67E-2	regulation of granulocyte macrophage colony-stimulating factor production
3	GO:0042535	2/134	10/13778	20.56	4.01E-3	1.67E-2	positive regulation of tumor necrosis factor biosynthetic process
3	GO:0009266	5/134	108/13778	4.76	4.05E-3	1.68E-2	response to temperature stimulus
3	GO:0042327	13/134	577/13778	2.32	4.08E-3	1.69E-2	positive regulation of phosphorylation
3	GO:0015695	3/134	34/13778	9.07	4.32E-3	1.78E-2	organic cation transport
3	GO:0045777	3/134	34/13778	9.07	4.32E-3	1.78E-2	positive regulation of blood pressure
3	GO:0015893	3/134	34/13778	9.07	4.32E-3	1.78E-2	drug transport
3	GO:0010942	11/134	449/13778	2.52	4.39E-3	1.81E-2	positive regulation of cell death
3	GO:0051222	6/134	159/13778	3.88	4.59E-3	1.89E-2	positive regulation of protein transport
3	GO:0002709	3/134	35/13778	8.81	4.69E-3	1.93E-2	regulation of T cell mediated immunity
3	GO:0034101	4/134	70/13778	5.88	4.78E-3	1.96E-2	erythrocyte homeostasis
3	GO:0002710	2/134	11/13778	18.69	4.88E-3	1.99E-2	negative regulation of T cell mediated immunity
3	GO:2000406	2/134	11/13778	18.69	4.88E-3	1.99E-2	positive regulation of T cell migration
3	GO:0071356	4/134	71/13778	5.79	5.03E-3	2.05E-2	cellular response to tumor necrosis factor
3	GO:0048871	5/134	115/13778	4.47	5.28E-3	2.15E-2	multicellular organismal homeostasis
3	GO:0002755	4/134	72/13778	5.71	5.28E-3	2.15E-2	MyD88-dependent toll-like receptor signaling pathway
3	GO:0031341	3/134	37/13778	8.34	5.49E-3	2.23E-2	regulation of cell killing
3	GO:0031399	19/134	1038/13778	1.88	5.51E-3	2.23E-2	regulation of protein modification process
3	GO:0050728	4/134	73/13778	5.63	5.55E-3	2.24E-2	negative regulation of inflammatory response
3	GO:0050858	2/134	12/13778	17.14	5.81E-3	2.32E-2	negative regulation of antigen receptor-mediated signaling pathway
3	GO:0002446	2/134	12/13778	17.14	5.81E-3	2.32E-2	neutrophil mediated immunity
3	GO:0072593	4/134	74/13778	5.56	5.82E-3	2.32E-2	reactive oxygen species metabolic process
3	GO:0034123	2/134	12/13778	17.14	5.81E-3	2.32E-2	positive regulation of toll-like receptor signaling pathway
3	GO:0045117	2/134	12/13778	17.14	5.81E-3	2.32E-2	azole transport
3	GO:0045078	2/134	12/13778	17.14	5.81E-3	2.32E-2	positive regulation of interferon-gamma biosynthetic process
3	GO:0030889	2/134	12/13778	17.14	5.81E-3	2.32E-2	negative regulation of B cell proliferation
3	GO:0007252	2/134	12/13778	17.14	5.81E-3	2.32E-2	I-kappaB phosphorylation
3	GO:0090322	2/134	12/13778	17.14	5.81E-3	2.32E-2	regulation of superoxide metabolic process
3	GO:0030029	9/134	338/13778	2.74	5.77E-3	2.32E-2	actin filament-based process
3	GO:0045921	3/134	38/13778	8.12	5.92E-3	2.35E-2	positive regulation of exocytosis
3	GO:0051924	5/134	119/13778	4.32	6.09E-3	2.42E-2	regulation of calcium ion transport
3	GO:0060341	13/134	606/13778	2.21	6.12E-3	2.42E-2	regulation of cellular localization
3	GO:0010959	6/134	169/13778	3.65	6.15E-3	2.43E-2	regulation of metal ion transport
3	GO:0032535	6/134	169/13778	3.65	6.15E-3	2.43E-2	regulation of cellular component size
3	GO:0060402	3/134	39/13778	7.91	6.37E-3	2.51E-2	calcium ion transport into cytosol
3	GO:0002761	4/134	76/13778	5.41	6.39E-3	2.52E-2	regulation of myeloid leukocyte differentiation
3	GO:0072330	6/134	171/13778	3.61	6.51E-3	2.56E-2	monocarboxylic acid biosynthetic process
3	GO:0045670	3/134	40/13778	7.71	6.83E-3	2.66E-2	regulation of osteoclast differentiation
3	GO:0060401	3/134	40/13778	7.71	6.83E-3	2.66E-2	cytosolic calcium ion transport
3	GO:2000249	2/134	13/13778	15.82	6.83E-3	2.66E-2	regulation of actin cytoskeleton reorganization
3	GO:0043252	2/134	13/13778	15.82	6.83E-3	2.66E-2	sodium-independent organic anion transport
3	GO:2000404	2/134	13/13778	15.82	6.83E-3	2.66E-2	regulation of T cell migration
3	GO:0006957	2/134	13/13778	15.82	6.83E-3	2.66E-2	complement activation, alternative pathway
3	GO:0090066	7/134	228/13778	3.16	6.90E-3	2.68E-2	regulation of anatomical structure size
3	GO:0008063	4/134	78/13778	5.27	7.00E-3	2.72E-2	Toll signaling pathway
3	GO:0043410	6/134	175/13778	3.53	7.26E-3	2.81E-2	positive regulation of MAPK cascade
3	GO:0071496	6/134	175/13778	3.53	7.26E-3	2.81E-2	cellular response to external stimulus
3	GO:0002831	4/134	80/13778	5.14	7.65E-3	2.95E-2	regulation of response to biotic stimulus
3	GO:0001959	4/134	80/13778	5.14	7.65E-3	2.95E-2	regulation of cytokine-mediated signaling pathway
3	GO:0043067	20/134	1150/13778	1.79	7.69E-3	2.96E-2	regulation of programmed cell death
3	GO:0032655	3/134	42/13778	7.34	7.83E-3	3.00E-2	regulation of interleukin-12 production
3	GO:0034103	3/134	42/13778	7.34	7.83E-3	3.00E-2	regulation of tissue remodeling
3	GO:0042531	3/134	42/13778	7.34	7.83E-3	3.00E-2	positive regulation of tyrosine phosphorylation of STAT protein
3	GO:0097028	2/134	14/13778	14.69	7.91E-3	3.01E-2	dendritic cell differentiation
3	GO:0046173	2/134	14/13778	14.69	7.91E-3	3.01E-2	polyol biosynthetic process
3	GO:0010884	2/134	14/13778	14.69	7.91E-3	3.01E-2	positive regulation of lipid storage
3	GO:0045086	2/134	14/13778	14.69	7.91E-3	3.01E-2	positive regulation of interleukin-2 biosynthetic process
3	GO:0034142	4/134	81/13778	5.08	7.99E-3	3.03E-2	toll-like receptor 4 signaling pathway
3	GO:0009893	30/134	1980/13778	1.56	7.98E-3	3.03E-2	positive regulation of metabolic process
3	GO:0042592	19/134	1078/13778	1.81	8.17E-3	3.09E-2	homeostatic process
3	GO:0006876	1/134	1/13778	102.82	9.73E-3	3.12E-2	cellular cadmium ion homeostasis
3	GO:0050859	1/134	1/13778	102.82	9.73E-3	3.12E-2	negative regulation of B cell receptor signaling pathway
3	GO:0001805	1/134	1/13778	102.82	9.73E-3	3.12E-2	positive regulation of type III hypersensitivity
3	GO:0001803	1/134	1/13778	102.82	9.73E-3	3.12E-2	regulation of type III hypersensitivity
3	GO:0045234	1/134	1/13778	102.82	9.73E-3	3.12E-2	protein palmitoleylation
3	GO:0043016	1/134	1/13778	102.82	9.73E-3	3.12E-2	regulation of lymphotoxin A biosynthetic process
3	GO:0043017	1/134	1/13778	102.82	9.73E-3	3.12E-2	positive regulation of lymphotoxin A biosynthetic process
3	GO:0052063	1/134	1/13778	102.82	9.73E-3	3.12E-2	induction by symbiont of defense-related host nitric oxide production
3	GO:0001879	1/134	1/13778	102.82	9.73E-3	3.12E-2	detection of yeast
3	GO:0038156	1/134	1/13778	102.82	9.73E-3	3.12E-2	interleukin-3-mediated signaling pathway
3	GO:0002462	1/134	1/13778	102.82	9.73E-3	3.12E-2	tolerance induction to nonself antigen
3	GO:0002461	1/134	1/13778	102.82	9.73E-3	3.12E-2	tolerance induction dependent upon immune response
3	GO:0042253	1/134	1/13778	102.82	9.73E-3	3.12E-2	granulocyte macrophage colony-stimulating factor biosynthetic process
3	GO:0035691	1/134	1/13778	102.82	9.73E-3	3.12E-2	macrophage migration inhibitory factor signaling pathway
3	GO:2001205	1/134	1/13778	102.82	9.73E-3	3.12E-2	negative regulation of osteoclast development
3	GO:2001204	1/134	1/13778	102.82	9.73E-3	3.12E-2	regulation of osteoclast development
3	GO:2001202	1/134	1/13778	102.82	9.73E-3	3.12E-2	negative regulation of transforming growth factor-beta secretion
3	GO:2001201	1/134	1/13778	102.82	9.73E-3	3.12E-2	regulation of transforming growth factor-beta secretion
3	GO:0010924	1/134	1/13778	102.82	9.73E-3	3.12E-2	regulation of inositol-polyphosphate 5-phosphatase activity
3	GO:0010925	1/134	1/13778	102.82	9.73E-3	3.12E-2	positive regulation of inositol-polyphosphate 5-phosphatase activity
3	GO:0010920	1/134	1/13778	102.82	9.73E-3	3.12E-2	negative regulation of inositol phosphate biosynthetic process
3	GO:0014739	1/134	1/13778	102.82	9.73E-3	3.12E-2	positive regulation of muscle hyperplasia
3	GO:0010941	20/134	1175/13778	1.75	9.64E-3	3.12E-2	regulation of cell death
3	GO:0014744	1/134	1/13778	102.82	9.73E-3	3.12E-2	positive regulation of muscle adaptation
3	GO:0033124	8/134	303/13778	2.71	9.54E-3	3.12E-2	regulation of GTP catabolic process
3	GO:0042231	1/134	1/13778	102.82	9.73E-3	3.12E-2	interleukin-13 biosynthetic process
3	GO:0034110	2/134	15/13778	13.71	9.07E-3	3.12E-2	regulation of homotypic cell-cell adhesion
3	GO:0052558	1/134	1/13778	102.82	9.73E-3	3.12E-2	induction by organism of immune response of other organism involved in symbiotic interaction
3	GO:0052559	1/134	1/13778	102.82	9.73E-3	3.12E-2	induction by symbiont of host immune response
3	GO:0052163	1/134	1/13778	102.82	9.73E-3	3.12E-2	modulation by symbiont of defense-related host nitric oxide production
3	GO:0043378	1/134	1/13778	102.82	9.73E-3	3.12E-2	positive regulation of CD8-positive, alpha-beta T cell differentiation
3	GO:0043376	1/134	1/13778	102.82	9.73E-3	3.12E-2	regulation of CD8-positive, alpha-beta T cell differentiation
3	GO:0045917	1/134	1/13778	102.82	9.73E-3	3.12E-2	positive regulation of complement activation
3	GO:0002407	2/134	15/13778	13.71	9.07E-3	3.12E-2	dendritic cell chemotaxis
3	GO:0070839	1/134	1/13778	102.82	9.73E-3	3.12E-2	divalent metal ion export
3	GO:0015707	1/134	1/13778	102.82	9.73E-3	3.12E-2	nitrite transport
3	GO:0032102	5/134	132/13778	3.89	9.34E-3	3.12E-2	negative regulation of response to external stimulus
3	GO:0007162	4/134	85/13778	4.84	9.44E-3	3.12E-2	negative regulation of cell adhesion
3	GO:0002316	1/134	1/13778	102.82	9.73E-3	3.12E-2	follicular B cell differentiation
3	GO:2000670	1/134	1/13778	102.82	9.73E-3	3.12E-2	positive regulation of dendritic cell apoptotic process
3	GO:0061011	1/134	1/13778	102.82	9.73E-3	3.12E-2	hepatic duct development
3	GO:2000259	1/134	1/13778	102.82	9.73E-3	3.12E-2	positive regulation of protein activation cascade
3	GO:2000254	1/134	1/13778	102.82	9.73E-3	3.12E-2	regulation of male germ cell proliferation
3	GO:2000256	1/134	1/13778	102.82	9.73E-3	3.12E-2	positive regulation of male germ cell proliferation
3	GO:0060305	1/134	1/13778	102.82	9.73E-3	3.12E-2	regulation of cell diameter
3	GO:0033367	1/134	1/13778	102.82	9.73E-3	3.12E-2	protein localization to mast cell secretory granule
3	GO:0033368	1/134	1/13778	102.82	9.73E-3	3.12E-2	protease localization to mast cell secretory granule
3	GO:0033366	1/134	1/13778	102.82	9.73E-3	3.12E-2	protein localization to secretory granule
3	GO:0033371	1/134	1/13778	102.82	9.73E-3	3.12E-2	T cell secretory granule organization
3	GO:0033370	1/134	1/13778	102.82	9.73E-3	3.12E-2	maintenance of protein location in mast cell secretory granule
3	GO:0033373	1/134	1/13778	102.82	9.73E-3	3.12E-2	maintenance of protease location in mast cell secretory granule
3	GO:0033379	1/134	1/13778	102.82	9.73E-3	3.12E-2	maintenance of protease location in T cell secretory granule
3	GO:0033374	1/134	1/13778	102.82	9.73E-3	3.12E-2	protein localization to T cell secretory granule
3	GO:0033375	1/134	1/13778	102.82	9.73E-3	3.12E-2	protease localization to T cell secretory granule
3	GO:0033377	1/134	1/13778	102.82	9.73E-3	3.12E-2	maintenance of protein location in T cell secretory granule
3	GO:0014895	1/134	1/13778	102.82	9.73E-3	3.12E-2	smooth muscle hypertrophy
3	GO:0043254	6/134	180/13778	3.43	8.29E-3	3.12E-2	regulation of protein complex assembly
3	GO:0052263	1/134	1/13778	102.82	9.73E-3	3.12E-2	induction by organism of defense-related nitric oxide production in other organism involved in symbiotic interaction
3	GO:0035547	1/134	1/13778	102.82	9.73E-3	3.12E-2	regulation of interferon-beta secretion
3	GO:0035548	1/134	1/13778	102.82	9.73E-3	3.12E-2	negative regulation of interferon-beta secretion
3	GO:0032616	1/134	1/13778	102.82	9.73E-3	3.12E-2	interleukin-13 production
3	GO:0070947	1/134	1/13778	102.82	9.73E-3	3.12E-2	neutrophil mediated killing of fungus
3	GO:0090467	1/134	1/13778	102.82	9.73E-3	3.12E-2	arginine import
3	GO:0032632	1/134	1/13778	102.82	9.73E-3	3.12E-2	interleukin-3 production
3	GO:0035509	1/134	1/13778	102.82	9.73E-3	3.12E-2	negative regulation of myosin-light-chain-phosphatase activity
3	GO:0002721	1/134	1/13778	102.82	9.73E-3	3.12E-2	regulation of B cell cytokine production
3	GO:2000403	2/134	15/13778	13.71	9.07E-3	3.12E-2	positive regulation of lymphocyte migration
3	GO:0032681	1/134	1/13778	102.82	9.73E-3	3.12E-2	regulation of lymphotoxin A production
3	GO:0003059	1/134	1/13778	102.82	9.73E-3	3.12E-2	positive regulation of the force of heart contraction by epinephrine
3	GO:0003083	1/134	1/13778	102.82	9.73E-3	3.12E-2	negative regulation of renal output by angiotensin
3	GO:0042892	1/134	1/13778	102.82	9.73E-3	3.12E-2	chloramphenicol transport
3	GO:0030845	1/134	1/13778	102.82	9.73E-3	3.12E-2	phospholipase C-inhibiting G-protein coupled receptor signaling pathway
3	GO:0032604	1/134	1/13778	102.82	9.73E-3	3.12E-2	granulocyte macrophage colony-stimulating factor production
3	GO:0071226	1/134	1/13778	102.82	9.73E-3	3.12E-2	cellular response to molecule of fungal origin
3	GO:0017157	4/134	83/13778	4.96	8.69E-3	3.12E-2	regulation of exocytosis
3	GO:0014004	1/134	1/13778	102.82	9.73E-3	3.12E-2	microglia differentiation
3	GO:0014005	1/134	1/13778	102.82	9.73E-3	3.12E-2	microglia development
3	GO:0033274	1/134	1/13778	102.82	9.73E-3	3.12E-2	response to vitamin B2
3	GO:0045428	3/134	43/13778	7.17	8.36E-3	3.12E-2	regulation of nitric oxide biosynthetic process
3	GO:2001188	1/134	1/13778	102.82	9.73E-3	3.12E-2	regulation of T cell activation via T cell receptor contact with antigen bound to MHC molecule on antigen presenting cell
3	GO:2001189	1/134	1/13778	102.82	9.73E-3	3.12E-2	negative regulation of T cell activation via T cell receptor contact with antigen bound to MHC molecule on antigen presenting cell
3	GO:2001186	1/134	1/13778	102.82	9.73E-3	3.12E-2	negative regulation of CD8-positive, alpha-beta T cell activation
3	GO:0052347	1/134	1/13778	102.82	9.73E-3	3.12E-2	positive regulation by symbiont of defense-related host nitric oxide production
3	GO:2001181	1/134	1/13778	102.82	9.73E-3	3.12E-2	positive regulation of interleukin-10 secretion
3	GO:2001180	1/134	1/13778	102.82	9.73E-3	3.12E-2	negative regulation of interleukin-10 secretion
3	GO:0052345	1/134	1/13778	102.82	9.73E-3	3.12E-2	positive regulation by organism of defense-related nitric oxide production in other organism involved in symbiotic interaction
3	GO:2001183	1/134	1/13778	102.82	9.73E-3	3.12E-2	negative regulation of interleukin-12 secretion
3	GO:2001182	1/134	1/13778	102.82	9.73E-3	3.12E-2	regulation of interleukin-12 secretion
3	GO:2001191	1/134	1/13778	102.82	9.73E-3	3.12E-2	regulation of gamma-delta T cell activation involved in immune response
3	GO:2001193	1/134	1/13778	102.82	9.73E-3	3.12E-2	positive regulation of gamma-delta T cell activation involved in immune response
3	GO:0007204	5/134	133/13778	3.87	9.63E-3	3.12E-2	elevation of cytosolic calcium ion concentration
3	GO:0003106	1/134	1/13778	102.82	9.73E-3	3.12E-2	negative regulation of glomerular filtration by angiotensin
3	GO:0051126	1/134	1/13778	102.82	9.73E-3	3.12E-2	negative regulation of actin nucleation
3	GO:0070667	1/134	1/13778	102.82	9.73E-3	3.12E-2	negative regulation of mast cell proliferation
3	GO:0046916	1/134	1/13778	102.82	9.73E-3	3.12E-2	cellular transition metal ion homeostasis
3	GO:0050790	28/134	1826/13778	1.58	8.98E-3	3.12E-2	regulation of catalytic activity
3	GO:0006948	1/134	1/13778	102.82	9.73E-3	3.12E-2	induction by virus of host cell-cell fusion
3	GO:0042033	1/134	1/13778	102.82	9.73E-3	3.12E-2	chemokine biosynthetic process
3	GO:0001970	1/134	1/13778	102.82	9.73E-3	3.12E-2	positive regulation of activation of membrane attack complex
3	GO:0002586	1/134	1/13778	102.82	9.73E-3	3.12E-2	regulation of antigen processing and presentation of peptide antigen via MHC class II
3	GO:0002588	1/134	1/13778	102.82	9.73E-3	3.12E-2	positive regulation of antigen processing and presentation of peptide antigen via MHC class II
3	GO:0002582	1/134	1/13778	102.82	9.73E-3	3.12E-2	positive regulation of antigen processing and presentation of peptide or polysaccharide antigen via MHC class II
3	GO:2000489	1/134	1/13778	102.82	9.73E-3	3.12E-2	regulation of hepatic stellate cell activation
3	GO:2000491	1/134	1/13778	102.82	9.73E-3	3.12E-2	positive regulation of hepatic stellate cell activation
3	GO:0045728	1/134	1/13778	102.82	9.73E-3	3.12E-2	respiratory burst after phagocytosis
3	GO:0001909	2/134	15/13778	13.71	9.07E-3	3.12E-2	leukocyte mediated cytotoxicity
3	GO:0070560	1/134	1/13778	102.82	9.73E-3	3.12E-2	protein secretion by platelet
3	GO:0055076	1/134	1/13778	102.82	9.73E-3	3.12E-2	transition metal ion homeostasis
3	GO:0045342	1/134	1/13778	102.82	9.73E-3	3.12E-2	MHC class II biosynthetic process
3	GO:1900542	10/134	433/13778	2.37	9.69E-3	3.12E-2	regulation of purine nucleotide metabolic process
3	GO:0052302	1/134	1/13778	102.82	9.73E-3	3.12E-2	modulation by organism of defense-related nitric oxide production in other organism involved in symbiotic interaction
3	GO:0043091	1/134	1/13778	102.82	9.73E-3	3.12E-2	L-arginine import
3	GO:0001969	1/134	1/13778	102.82	9.73E-3	3.12E-2	regulation of activation of membrane attack complex
3	GO:0033382	1/134	1/13778	102.82	9.73E-3	3.12E-2	maintenance of granzyme B location in T cell secretory granule
3	GO:0043087	8/134	300/13778	2.74	9.02E-3	3.12E-2	regulation of GTPase activity
3	GO:0033380	1/134	1/13778	102.82	9.73E-3	3.12E-2	granzyme B localization to T cell secretory granule
3	GO:0070374	4/134	86/13778	4.78	9.83E-3	3.14E-2	positive regulation of ERK1 and ERK2 cascade
3	GO:0060759	4/134	86/13778	4.78	9.83E-3	3.14E-2	regulation of response to cytokine stimulus
3	GO:0006140	10/134	435/13778	2.36	9.99E-3	3.19E-2	regulation of nucleotide metabolic process
3	GO:0032502	53/134	4112/13778	1.33	1.00E-2	3.20E-2	developmental process
3	GO:0043011	2/134	16/13778	12.85	1.03E-2	3.26E-2	myeloid dendritic cell differentiation
3	GO:0044130	2/134	16/13778	12.85	1.03E-2	3.26E-2	negative regulation of growth of symbiont in host
3	GO:0044126	2/134	16/13778	12.85	1.03E-2	3.26E-2	regulation of growth of symbiont in host
3	GO:0045932	2/134	16/13778	12.85	1.03E-2	3.26E-2	negative regulation of muscle contraction
3	GO:0032609	2/134	16/13778	12.85	1.03E-2	3.26E-2	interferon-gamma production
3	GO:0036336	2/134	16/13778	12.85	1.03E-2	3.26E-2	dendritic cell migration
3	GO:0030502	2/134	16/13778	12.85	1.03E-2	3.26E-2	negative regulation of bone mineralization
3	GO:0045859	13/134	647/13778	2.07	1.03E-2	3.26E-2	regulation of protein kinase activity
3	GO:0033674	10/134	439/13778	2.34	1.06E-2	3.34E-2	positive regulation of kinase activity
3	GO:0048856	48/134	3650/13778	1.35	1.06E-2	3.35E-2	anatomical structure development
3	GO:0002440	3/134	47/13778	6.56	1.07E-2	3.36E-2	production of molecular mediator of immune response
3	GO:0065009	32/134	2197/13778	1.50	1.07E-2	3.36E-2	regulation of molecular function
3	GO:0007275	49/134	3754/13778	1.34	1.12E-2	3.51E-2	multicellular organismal development
3	GO:0009891	21/134	1274/13778	1.69	1.13E-2	3.54E-2	positive regulation of biosynthetic process
3	GO:0044144	2/134	17/13778	12.10	1.16E-2	3.61E-2	modulation of growth of symbiont involved in interaction with host
3	GO:0044146	2/134	17/13778	12.10	1.16E-2	3.61E-2	negative regulation of growth of symbiont involved in interaction with host
3	GO:0030866	2/134	17/13778	12.10	1.16E-2	3.61E-2	cortical actin cytoskeleton organization
3	GO:0032733	2/134	17/13778	12.10	1.16E-2	3.61E-2	positive regulation of interleukin-10 production
3	GO:0006906	2/134	17/13778	12.10	1.16E-2	3.61E-2	vesicle fusion
3	GO:0001914	2/134	17/13778	12.10	1.16E-2	3.61E-2	regulation of T cell mediated cytotoxicity
3	GO:0010638	6/134	194/13778	3.18	1.17E-2	3.64E-2	positive regulation of organelle organization
3	GO:0051347	10/134	447/13778	2.30	1.19E-2	3.70E-2	positive regulation of transferase activity
3	GO:0034612	4/134	92/13778	4.47	1.24E-2	3.83E-2	response to tumor necrosis factor
3	GO:2000021	5/134	142/13778	3.62	1.25E-2	3.88E-2	regulation of ion homeostasis
3	GO:0046427	3/134	50/13778	6.17	1.26E-2	3.90E-2	positive regulation of JAK-STAT cascade
3	GO:0042509	3/134	50/13778	6.17	1.26E-2	3.90E-2	regulation of tyrosine phosphorylation of STAT protein
3	GO:0032787	9/134	384/13778	2.41	1.27E-2	3.91E-2	monocarboxylic acid metabolic process
3	GO:0055065	8/134	319/13778	2.58	1.27E-2	3.92E-2	metal ion homeostasis
3	GO:0030260	2/134	18/13778	11.42	1.30E-2	3.94E-2	entry into host cell
3	GO:0034605	2/134	18/13778	11.42	1.30E-2	3.94E-2	cellular response to heat
3	GO:0051828	2/134	18/13778	11.42	1.30E-2	3.94E-2	entry into other organism involved in symbiotic interaction
3	GO:0051806	2/134	18/13778	11.42	1.30E-2	3.94E-2	entry into cell of other organism involved in symbiotic interaction
3	GO:0052126	2/134	18/13778	11.42	1.30E-2	3.94E-2	movement in host environment
3	GO:0001782	2/134	18/13778	11.42	1.30E-2	3.94E-2	B cell homeostasis
3	GO:0052192	2/134	18/13778	11.42	1.30E-2	3.94E-2	movement in environment of other organism involved in symbiotic interaction
3	GO:0033630	2/134	18/13778	11.42	1.30E-2	3.94E-2	positive regulation of cell adhesion mediated by integrin
3	GO:0044409	2/134	18/13778	11.42	1.30E-2	3.94E-2	entry into host
3	GO:0042104	2/134	18/13778	11.42	1.30E-2	3.94E-2	positive regulation of activated T cell proliferation
3	GO:0070168	2/134	18/13778	11.42	1.30E-2	3.94E-2	negative regulation of biomineral tissue development
3	GO:0032268	21/134	1292/13778	1.67	1.31E-2	3.97E-2	regulation of cellular protein metabolic process
3	GO:0043547	7/134	260/13778	2.77	1.36E-2	4.11E-2	positive regulation of GTPase activity
3	GO:0043408	10/134	457/13778	2.25	1.38E-2	4.16E-2	regulation of MAPK cascade
3	GO:0042981	19/134	1136/13778	1.72	1.38E-2	4.16E-2	regulation of apoptotic process
3	GO:0042269	2/134	19/13778	10.82	1.44E-2	4.33E-2	regulation of natural killer cell mediated cytotoxicity
3	GO:0030865	2/134	19/13778	10.82	1.44E-2	4.33E-2	cortical cytoskeleton organization
3	GO:0044364	2/134	19/13778	10.82	1.44E-2	4.33E-2	disruption of cells of other organism
3	GO:0031640	2/134	19/13778	10.82	1.44E-2	4.33E-2	killing of cells of other organism
3	GO:0016337	8/134	327/13778	2.52	1.46E-2	4.38E-2	cell-cell adhesion
3	GO:0051480	5/134	148/13778	3.47	1.48E-2	4.43E-2	cytosolic calcium ion homeostasis
3	GO:0002698	3/134	53/13778	5.82	1.48E-2	4.43E-2	negative regulation of immune effector process
3	GO:0043549	13/134	680/13778	1.97	1.51E-2	4.52E-2	regulation of kinase activity
3	GO:0008285	11/134	535/13778	2.11	1.53E-2	4.56E-2	negative regulation of cell proliferation
3	GO:0033121	8/134	331/13778	2.49	1.56E-2	4.65E-2	regulation of purine nucleotide catabolic process
3	GO:0050832	2/134	20/13778	10.28	1.59E-2	4.71E-2	defense response to fungus
3	GO:0061077	2/134	20/13778	10.28	1.59E-2	4.71E-2	chaperone-mediated protein folding
3	GO:0045076	2/134	20/13778	10.28	1.59E-2	4.71E-2	regulation of interleukin-2 biosynthetic process
3	GO:0002715	2/134	20/13778	10.28	1.59E-2	4.71E-2	regulation of natural killer cell mediated immunity
3	GO:0009118	8/134	332/13778	2.48	1.58E-2	4.71E-2	regulation of nucleoside metabolic process
3	GO:0030811	8/134	332/13778	2.48	1.58E-2	4.71E-2	regulation of nucleotide catabolic process
3	GO:0033043	10/134	471/13778	2.18	1.67E-2	4.92E-2	regulation of organelle organization
4	GO:0044237	51/63	7521/13778	1.48	1.05E-5	1.35E-2	cellular metabolic process
4	GO:0044260	42/63	5573/13778	1.65	2.26E-5	1.46E-2	cellular macromolecule metabolic process
4	GO:0008104	17/63	1272/13778	2.92	3.85E-5	1.65E-2	protein localization
4	GO:0043170	43/63	6078/13778	1.55	9.17E-5	2.95E-2	macromolecule metabolic process
4	GO:0044710	51/63	8050/13778	1.39	1.25E-4	3.01E-2	single-organism metabolic process
4	GO:0006412	11/63	654/13778	3.68	1.64E-4	3.01E-2	translation
4	GO:0044238	49/63	7579/13778	1.41	1.44E-4	3.01E-2	primary metabolic process
4	GO:0006487	4/63	94/13778	9.31	8.90E-4	4.94E-2	protein N-linked glycosylation
4	GO:0006486	6/63	225/13778	5.83	5.55E-4	4.94E-2	protein glycosylation
4	GO:0033036	17/63	1535/13778	2.42	3.89E-4	4.94E-2	macromolecule localization
4	GO:0043413	6/63	225/13778	5.83	5.55E-4	4.94E-2	macromolecule glycosylation
4	GO:0070085	6/63	229/13778	5.73	6.09E-4	4.94E-2	glycosylation
4	GO:0009100	7/63	327/13778	4.68	7.04E-4	4.94E-2	glycoprotein metabolic process
4	GO:0018279	4/63	89/13778	9.83	7.25E-4	4.94E-2	protein N-linked glycosylation via asparagine
4	GO:0071704	49/63	7769/13778	1.38	3.22E-4	4.94E-2	organic substance metabolic process
4	GO:0042987	2/63	10/13778	43.74	9.04E-4	4.94E-2	amyloid precursor protein catabolic process
4	GO:0046907	12/63	932/13778	2.82	9.20E-4	4.94E-2	intracellular transport
4	GO:0048193	5/63	159/13778	6.88	7.88E-4	4.94E-2	Golgi vesicle transport
4	GO:0008152	52/63	8568/13778	1.33	3.76E-4	4.94E-2	metabolic process
4	GO:0006903	3/63	39/13778	16.82	7.40E-4	4.94E-2	vesicle targeting
4	GO:0007175	2/63	8/13778	54.67	5.66E-4	4.94E-2	negative regulation of epidermal growth factor-activated receptor activity
4	GO:0044267	24/63	2756/13778	1.90	6.82E-4	4.94E-2	cellular protein metabolic process
4	GO:0050435	2/63	10/13778	43.74	9.04E-4	4.94E-2	beta-amyloid metabolic process
4	GO:0018196	4/63	90/13778	9.72	7.56E-4	4.94E-2	peptidyl-asparagine modification
4	GO:0010467	27/63	3361/13778	1.76	9.65E-4	4.97E-2	gene expression
4	GO:0051641	16/63	1514/13778	2.31	1.01E-3	5.00E-2	cellular localization
5	GO:0031571	5/74	73/13778	12.75	4.41E-5	2.16E-3	mitotic cell cycle G1/S transition DNA damage checkpoint
5	GO:0002479	5/74	73/13778	12.75	4.41E-5	2.16E-3	antigen processing and presentation of exogenous peptide antigen via MHC class I, TAP-dependent
5	GO:0072395	5/74	70/13778	13.30	3.59E-5	2.16E-3	signal transduction involved in cell cycle checkpoint
5	GO:0006412	13/74	654/13778	3.70	3.97E-5	2.16E-3	translation
5	GO:0051436	5/74	67/13778	13.89	2.90E-5	2.16E-3	negative regulation of ubiquitin-protein ligase activity involved in mitotic cell cycle
5	GO:0051437	5/74	72/13778	12.93	4.12E-5	2.16E-3	positive regulation of ubiquitin-protein ligase activity involved in mitotic cell cycle
5	GO:0051444	5/74	72/13778	12.93	4.12E-5	2.16E-3	negative regulation of ubiquitin-protein ligase activity
5	GO:0006977	5/74	67/13778	13.89	2.90E-5	2.16E-3	DNA damage response, signal transduction by p53 class mediator resulting in cell cycle arrest
5	GO:0072413	5/74	67/13778	13.89	2.90E-5	2.16E-3	signal transduction involved in mitotic cell cycle checkpoint
5	GO:0072422	5/74	69/13778	13.49	3.35E-5	2.16E-3	signal transduction involved in DNA damage checkpoint
5	GO:0072431	5/74	67/13778	13.89	2.90E-5	2.16E-3	signal transduction involved in mitotic cell cycle G1/S transition DNA damage checkpoint
5	GO:0010467	35/74	3361/13778	1.94	1.48E-5	2.16E-3	gene expression
5	GO:0072401	5/74	69/13778	13.49	3.35E-5	2.16E-3	signal transduction involved in DNA integrity checkpoint
5	GO:0072404	5/74	68/13778	13.69	3.12E-5	2.16E-3	signal transduction involved in G1/S transition checkpoint
5	GO:0033238	5/74	73/13778	12.75	4.41E-5	2.16E-3	regulation of cellular amine metabolic process
5	GO:0006521	5/74	56/13778	16.62	1.20E-5	2.16E-3	regulation of cellular amino acid metabolic process
5	GO:0072474	5/74	67/13778	13.89	2.90E-5	2.16E-3	signal transduction involved in mitotic cell cycle G1/S checkpoint
5	GO:0051352	5/74	72/13778	12.93	4.12E-5	2.16E-3	negative regulation of ligase activity
5	GO:0042590	5/74	77/13778	12.09	5.70E-5	2.65E-3	antigen processing and presentation of exogenous peptide antigen via MHC class I
5	GO:0051439	5/74	78/13778	11.94	6.06E-5	2.68E-3	regulation of ubiquitin-protein ligase activity involved in mitotic cell cycle
5	GO:0000216	5/74	79/13778	11.78	6.45E-5	2.71E-3	M/G1 transition of mitotic cell cycle
5	GO:0031575	5/74	81/13778	11.49	7.27E-5	2.72E-3	mitotic cell cycle G1/S transition checkpoint
5	GO:0051443	5/74	82/13778	11.35	7.71E-5	2.72E-3	positive regulation of ubiquitin-protein ligase activity
5	GO:0071158	5/74	82/13778	11.35	7.71E-5	2.72E-3	positive regulation of cell cycle arrest
5	GO:0031145	5/74	80/13778	11.64	6.85E-5	2.72E-3	anaphase-promoting complex-dependent proteasomal ubiquitin-dependent protein catabolic process
5	GO:0071779	5/74	83/13778	11.22	8.17E-5	2.77E-3	G1/S transition checkpoint
5	GO:0051351	5/74	86/13778	10.82	9.68E-5	3.16E-3	positive regulation of ligase activity
5	GO:0030330	5/74	88/13778	10.58	1.08E-4	3.40E-3	DNA damage response, signal transduction by p53 class mediator
5	GO:0002474	5/74	95/13778	9.80	1.55E-4	4.56E-3	antigen processing and presentation of peptide antigen via MHC class I
5	GO:0031397	5/74	95/13778	9.80	1.55E-4	4.56E-3	negative regulation of protein ubiquitination
5	GO:0051438	5/74	96/13778	9.70	1.63E-4	4.64E-3	regulation of ubiquitin-protein ligase activity
5	GO:0042770	5/74	99/13778	9.40	1.88E-4	5.20E-3	signal transduction in response to DNA damage
5	GO:0051340	5/74	100/13778	9.31	1.97E-4	5.28E-3	regulation of ligase activity
5	GO:2000045	5/74	101/13778	9.22	2.07E-4	5.37E-3	regulation of G1/S transition of mitotic cell cycle
5	GO:0044710	58/74	8050/13778	1.34	2.37E-4	5.99E-3	single-organism metabolic process
5	GO:0009120	2/74	5/13778	74.48	2.82E-4	6.89E-3	deoxyribonucleoside metabolic process
5	GO:0044267	28/74	2756/13778	1.89	2.89E-4	6.89E-3	cellular protein metabolic process
5	GO:0072331	5/74	111/13778	8.39	3.21E-4	7.46E-3	signal transduction by p53 class mediator
5	GO:0008152	60/74	8568/13778	1.30	3.54E-4	8.01E-3	metabolic process
5	GO:0000084	5/74	116/13778	8.03	3.93E-4	8.68E-3	S phase of mitotic cell cycle
5	GO:0016032	11/74	624/13778	3.28	4.68E-4	1.01E-2	viral reproduction
5	GO:0051320	5/74	126/13778	7.39	5.75E-4	1.21E-2	S phase
5	GO:0031398	5/74	127/13778	7.33	5.96E-4	1.22E-2	positive regulation of protein ubiquitination
5	GO:0019048	8/74	358/13778	4.16	6.50E-4	1.30E-2	virus-host interaction
5	GO:0007093	5/74	134/13778	6.95	7.60E-4	1.43E-2	mitotic cell cycle checkpoint
5	GO:0016071	10/74	557/13778	3.34	7.52E-4	1.43E-2	mRNA metabolic process
5	GO:0000077	5/74	134/13778	6.95	7.60E-4	1.43E-2	DNA damage checkpoint
5	GO:0019538	30/74	3240/13778	1.72	8.18E-4	1.50E-2	protein metabolic process
5	GO:0031570	5/74	141/13778	6.60	9.56E-4	1.72E-2	DNA integrity checkpoint
5	GO:0071704	55/74	7769/13778	1.32	1.05E-3	1.86E-2	organic substance metabolic process
5	GO:2000602	5/74	150/13778	6.21	1.26E-3	2.18E-2	regulation of interphase of mitotic cell cycle
5	GO:0051701	8/74	401/13778	3.71	1.35E-3	2.29E-2	interaction with host
5	GO:0000209	5/74	158/13778	5.89	1.59E-3	2.59E-2	protein polyubiquitination
5	GO:0044260	43/74	5573/13778	1.44	1.57E-3	2.59E-2	cellular macromolecule metabolic process
5	GO:0002478	5/74	162/13778	5.75	1.77E-3	2.82E-2	antigen processing and presentation of exogenous peptide antigen
5	GO:0019884	5/74	164/13778	5.68	1.87E-3	2.82E-2	antigen processing and presentation of exogenous antigen
5	GO:0010565	5/74	165/13778	5.64	1.92E-3	2.82E-2	regulation of cellular ketone metabolic process
5	GO:0044403	8/74	423/13778	3.52	1.89E-3	2.82E-2	symbiosis, encompassing mutualism through parasitism
5	GO:0044419	8/74	423/13778	3.52	1.89E-3	2.82E-2	interspecies interaction between organisms
5	GO:0090068	5/74	163/13778	5.71	1.82E-3	2.82E-2	positive regulation of cell cycle process
5	GO:0000082	5/74	166/13778	5.61	1.97E-3	2.85E-2	G1/S transition of mitotic cell cycle
5	GO:0006364	4/74	102/13778	7.30	2.19E-3	3.09E-2	rRNA processing
5	GO:0043161	5/74	171/13778	5.44	2.24E-3	3.09E-2	proteasomal ubiquitin-dependent protein catabolic process
5	GO:0031396	5/74	171/13778	5.44	2.24E-3	3.09E-2	regulation of protein ubiquitination
5	GO:0010498	5/74	173/13778	5.38	2.36E-3	3.20E-2	proteasomal protein catabolic process
5	GO:0042638	5/74	174/13778	5.35	2.42E-3	3.21E-2	exogen
5	GO:0016072	4/74	105/13778	7.09	2.43E-3	3.21E-2	rRNA metabolic process
5	GO:0048002	5/74	176/13778	5.29	2.54E-3	3.30E-2	antigen processing and presentation of peptide antigen
5	GO:0043170	45/74	6078/13778	1.38	2.77E-3	3.50E-2	macromolecule metabolic process
5	GO:0022415	8/74	450/13778	3.31	2.78E-3	3.50E-2	viral reproductive process
5	GO:0048820	5/74	186/13778	5.01	3.23E-3	4.01E-2	hair follicle maturation
6	GO:0006396	18/54	594/13778	7.73	4.67E-12	3.99E-9	RNA processing
6	GO:0006397	12/54	359/13778	8.53	1.04E-8	3.14E-6	mRNA processing
6	GO:0008380	11/54	286/13778	9.81	1.10E-8	3.14E-6	RNA splicing
6	GO:0016071	14/54	557/13778	6.41	1.93E-8	4.13E-6	mRNA metabolic process
6	GO:0016070	29/54	2849/13778	2.60	8.61E-8	1.47E-5	RNA metabolic process
6	GO:0010467	31/54	3361/13778	2.35	2.16E-7	3.07E-5	gene expression
6	GO:0043484	5/54	54/13778	23.62	2.09E-6	2.55E-4	regulation of RNA splicing
6	GO:0090304	29/54	3412/13778	2.17	4.71E-6	5.03E-4	nucleic acid metabolic process
6	GO:0006139	31/54	4147/13778	1.91	2.71E-5	2.35E-3	nucleobase-containing compound metabolic process
6	GO:0044260	37/54	5573/13778	1.69	2.74E-5	2.35E-3	cellular macromolecule metabolic process
6	GO:0034641	32/54	4508/13778	1.81	5.35E-5	3.97E-3	cellular nitrogen compound metabolic process
6	GO:0046483	31/54	4293/13778	1.84	5.72E-5	3.97E-3	heterocycle metabolic process
6	GO:0006725	31/54	4304/13778	1.84	6.04E-5	3.97E-3	cellular aromatic compound metabolic process
6	GO:1901360	31/54	4488/13778	1.76	1.45E-4	8.88E-3	organic cyclic compound metabolic process
6	GO:0043170	37/54	6078/13778	1.55	2.49E-4	1.42E-2	macromolecule metabolic process
6	GO:0006807	32/54	4871/13778	1.68	2.82E-4	1.51E-2	nitrogen compound metabolic process
6	GO:0051252	23/54	2952/13778	1.99	3.71E-4	1.76E-2	regulation of RNA metabolic process
6	GO:0000245	3/54	36/13778	21.26	3.71E-4	1.76E-2	spliceosomal complex assembly
6	GO:0044238	42/54	7579/13778	1.41	4.29E-4	1.93E-2	primary metabolic process
6	GO:0051028	4/54	101/13778	10.10	6.49E-4	2.78E-2	mRNA transport
6	GO:0000398	5/54	186/13778	6.86	7.86E-4	2.92E-2	mRNA splicing, via spliceosome
6	GO:0000377	5/54	186/13778	6.86	7.86E-4	2.92E-2	RNA splicing, via transesterification reactions with bulged adenosine as nucleophile
6	GO:0010468	24/54	3308/13778	1.85	7.69E-4	2.92E-2	regulation of gene expression
6	GO:0000375	5/54	191/13778	6.68	8.86E-4	3.03E-2	RNA splicing, via transesterification reactions
6	GO:0071704	42/54	7769/13778	1.38	8.59E-4	3.03E-2	organic substance metabolic process
6	GO:0044237	41/54	7521/13778	1.39	9.77E-4	3.21E-2	cellular metabolic process
6	GO:0050658	4/54	116/13778	8.80	1.09E-3	3.22E-2	RNA transport
6	GO:0050657	4/54	116/13778	8.80	1.09E-3	3.22E-2	nucleic acid transport
6	GO:0051236	4/54	116/13778	8.80	1.09E-3	3.22E-2	establishment of RNA localization
6	GO:0051457	2/54	14/13778	36.45	1.33E-3	3.79E-2	maintenance of protein location in nucleus
6	GO:0006403	4/54	124/13778	8.23	1.40E-3	3.83E-2	RNA localization
6	GO:0006406	3/54	57/13778	13.43	1.43E-3	3.83E-2	mRNA export from nucleus
6	GO:0006376	2/54	16/13778	31.89	1.75E-3	4.53E-2	mRNA splice site selection
6	GO:0006405	3/54	63/13778	12.15	1.91E-3	4.81E-2	RNA export from nucleus
7	GO:0009311	5/65	34/13778	31.17	5.00E-7	1.01E-3	oligosaccharide metabolic process
7	GO:0035556	19/65	1290/13778	3.12	4.67E-6	4.71E-3	intracellular signal transduction
7	GO:0001779	3/65	12/13778	52.99	2.14E-5	1.44E-2	natural killer cell differentiation
7	GO:0001775	11/65	540/13778	4.32	3.96E-5	2.00E-2	cell activation
7	GO:0001817	9/65	369/13778	5.17	5.47E-5	2.21E-2	regulation of cytokine production
7	GO:0050878	11/65	577/13778	4.04	7.22E-5	2.34E-2	regulation of body fluid levels
7	GO:0007599	10/65	484/13778	4.38	8.23E-5	2.34E-2	hemostasis
7	GO:0002682	13/65	832/13778	3.31	1.13E-4	2.34E-2	regulation of immune system process
7	GO:0051174	17/65	1342/13778	2.69	1.16E-4	2.34E-2	regulation of phosphorus metabolic process
7	GO:0019220	17/65	1330/13778	2.71	1.04E-4	2.34E-2	regulation of phosphate metabolic process
7	GO:0007165	32/65	3808/13778	1.78	1.72E-4	2.89E-2	signal transduction
7	GO:0034405	3/65	23/13778	27.65	1.66E-4	2.89E-2	response to fluid shear stress
7	GO:0050865	8/65	346/13778	4.90	2.11E-4	3.19E-2	regulation of cell activation
7	GO:0048583	23/65	2313/13778	2.11	2.21E-4	3.19E-2	regulation of response to stimulus
7	GO:0043491	3/65	30/13778	21.20	3.71E-4	3.29E-2	protein kinase B signaling cascade
7	GO:0051494	4/65	73/13778	11.61	3.85E-4	3.29E-2	negative regulation of cytoskeleton organization
7	GO:0007596	9/65	480/13778	3.97	3.95E-4	3.29E-2	blood coagulation
7	GO:0032825	2/65	7/13778	60.56	4.53E-4	3.29E-2	positive regulation of natural killer cell differentiation
7	GO:0045087	9/65	452/13778	4.22	2.54E-4	3.29E-2	innate immune response
7	GO:0051251	6/65	206/13778	6.17	4.12E-4	3.29E-2	positive regulation of lymphocyte activation
7	GO:0051249	7/65	282/13778	5.26	3.53E-4	3.29E-2	regulation of lymphocyte activation
7	GO:0030168	6/65	203/13778	6.27	3.81E-4	3.29E-2	platelet activation
7	GO:0051239	19/65	1744/13778	2.31	3.06E-4	3.29E-2	regulation of multicellular organismal process
7	GO:0030101	3/65	27/13778	23.55	2.70E-4	3.29E-2	natural killer cell activation
7	GO:0034351	2/65	7/13778	60.56	4.53E-4	3.29E-2	negative regulation of glial cell apoptotic process
7	GO:0034350	2/65	7/13778	60.56	4.53E-4	3.29E-2	regulation of glial cell apoptotic process
7	GO:0042060	10/65	598/13778	3.54	4.56E-4	3.29E-2	wound healing
7	GO:0050817	9/65	480/13778	3.97	3.95E-4	3.29E-2	coagulation
7	GO:0007243	8/65	390/13778	4.35	4.72E-4	3.29E-2	intracellular protein kinase cascade
7	GO:0045597	9/65	497/13778	3.84	5.09E-4	3.32E-2	positive regulation of cell differentiation
7	GO:0030837	3/65	33/13778	19.27	4.94E-4	3.32E-2	negative regulation of actin filament polymerization
7	GO:0071345	8/65	398/13778	4.26	5.40E-4	3.40E-2	cellular response to cytokine stimulus
7	GO:0002684	9/65	503/13778	3.79	5.55E-4	3.40E-2	positive regulation of immune system process
7	GO:0044093	15/65	1258/13778	2.53	6.13E-4	3.44E-2	positive regulation of molecular function
7	GO:0023052	33/65	4245/13778	1.65	6.00E-4	3.44E-2	signaling
7	GO:0044700	33/65	4245/13778	1.65	6.00E-4	3.44E-2	single organism signaling
7	GO:0050896	42/65	6116/13778	1.46	7.91E-4	3.54E-2	response to stimulus
7	GO:0006468	11/65	773/13778	3.02	8.96E-4	3.54E-2	protein phosphorylation
7	GO:0050867	6/65	233/13778	5.46	7.88E-4	3.54E-2	positive regulation of cell activation
7	GO:0006013	2/65	9/13778	47.10	7.72E-4	3.54E-2	mannose metabolic process
7	GO:0044087	7/65	327/13778	4.54	8.51E-4	3.54E-2	regulation of cellular component biogenesis
7	GO:0002521	6/65	226/13778	5.63	6.72E-4	3.54E-2	leukocyte differentiation
7	GO:0048771	4/65	91/13778	9.32	8.86E-4	3.54E-2	tissue remodeling
7	GO:0010562	10/65	648/13778	3.27	8.50E-4	3.54E-2	positive regulation of phosphorus metabolic process
7	GO:0002260	3/65	40/13778	15.90	8.74E-4	3.54E-2	lymphocyte homeostasis
7	GO:0032823	2/65	10/13778	42.39	9.62E-4	3.54E-2	regulation of natural killer cell differentiation
7	GO:0045937	10/65	648/13778	3.27	8.50E-4	3.54E-2	positive regulation of phosphate metabolic process
7	GO:0007154	33/65	4349/13778	1.61	9.62E-4	3.54E-2	cell communication
7	GO:0051247	12/65	875/13778	2.91	7.06E-4	3.54E-2	positive regulation of protein metabolic process
7	GO:0032272	3/65	41/13778	15.51	9.40E-4	3.54E-2	negative regulation of protein polymerization
7	GO:0060391	2/65	9/13778	47.10	7.72E-4	3.54E-2	positive regulation of SMAD protein import into nucleus
7	GO:0002696	6/65	225/13778	5.65	6.56E-4	3.54E-2	positive regulation of leukocyte activation
7	GO:0002694	7/65	322/13778	4.61	7.77E-4	3.54E-2	regulation of leukocyte activation
7	GO:0046479	2/65	10/13778	42.39	9.62E-4	3.54E-2	glycosphingolipid catabolic process
7	GO:0019221	7/65	320/13778	4.64	7.49E-4	3.54E-2	cytokine-mediated signaling pathway
7	GO:0035307	2/65	11/13778	38.54	1.17E-3	3.82E-2	positive regulation of protein dephosphorylation
7	GO:0019377	2/65	11/13778	38.54	1.17E-3	3.82E-2	glycolipid catabolic process
7	GO:0060390	2/65	11/13778	38.54	1.17E-3	3.82E-2	regulation of SMAD protein import into nucleus
7	GO:0097305	6/65	250/13778	5.09	1.13E-3	3.82E-2	response to alcohol
7	GO:0045321	7/65	340/13778	4.36	1.07E-3	3.82E-2	leukocyte activation
7	GO:0043066	9/65	554/13778	3.44	1.10E-3	3.82E-2	negative regulation of apoptotic process
7	GO:0043085	13/65	1059/13778	2.60	1.16E-3	3.82E-2	positive regulation of catalytic activity
7	GO:0032956	5/65	170/13778	6.23	1.23E-3	3.84E-2	regulation of actin cytoskeleton organization
7	GO:0001934	9/65	563/13778	3.39	1.24E-3	3.84E-2	positive regulation of protein phosphorylation
7	GO:0043069	9/65	563/13778	3.39	1.24E-3	3.84E-2	negative regulation of programmed cell death
7	GO:0035306	2/65	12/13778	35.33	1.40E-3	3.95E-2	positive regulation of dephosphorylation
7	GO:0002460	4/65	103/13778	8.23	1.41E-3	3.95E-2	adaptive immune response based on somatic recombination of immune receptors built from immunoglobulin superfamily domains
7	GO:0006793	21/65	2283/13778	1.95	1.33E-3	3.95E-2	phosphorus metabolic process
7	GO:0043547	6/65	260/13778	4.89	1.39E-3	3.95E-2	positive regulation of GTPase activity
7	GO:0045471	4/65	103/13778	8.23	1.41E-3	3.95E-2	response to ethanol
7	GO:0048584	13/65	1077/13778	2.56	1.35E-3	3.95E-2	positive regulation of response to stimulus
7	GO:0046543	2/65	12/13778	35.33	1.40E-3	3.95E-2	development of secondary female sexual characteristics
7	GO:0051345	9/65	575/13778	3.32	1.43E-3	3.96E-2	positive regulation of hydrolase activity
7	GO:0042327	9/65	577/13778	3.31	1.47E-3	4.00E-2	positive regulation of phosphorylation
7	GO:0001776	3/65	48/13778	13.25	1.49E-3	4.01E-2	leukocyte homeostasis
7	GO:0060548	9/65	581/13778	3.28	1.54E-3	4.09E-2	negative regulation of cell death
7	GO:0060068	2/65	13/13778	32.61	1.65E-3	4.14E-2	vagina development
7	GO:0002376	16/65	1534/13778	2.21	1.66E-3	4.14E-2	immune system process
7	GO:0060389	2/65	13/13778	32.61	1.65E-3	4.14E-2	pathway-restricted SMAD protein phosphorylation
7	GO:0035066	2/65	13/13778	32.61	1.65E-3	4.14E-2	positive regulation of histone acetylation
7	GO:0016137	2/65	13/13778	32.61	1.65E-3	4.14E-2	glycoside metabolic process
7	GO:0046649	6/65	273/13778	4.66	1.78E-3	4.18E-2	lymphocyte activation
7	GO:0060443	3/65	51/13778	12.47	1.78E-3	4.18E-2	mammary gland morphogenesis
7	GO:0009611	12/65	973/13778	2.61	1.77E-3	4.18E-2	response to wounding
7	GO:0071310	14/65	1247/13778	2.38	1.73E-3	4.18E-2	cellular response to organic substance
7	GO:0006955	11/65	837/13778	2.79	1.71E-3	4.18E-2	immune response
7	GO:0031401	10/65	718/13778	2.95	1.84E-3	4.28E-2	positive regulation of protein modification process
7	GO:0030097	7/65	375/13778	3.96	1.87E-3	4.30E-2	hemopoiesis
7	GO:2000758	2/65	14/13778	30.28	1.92E-3	4.37E-2	positive regulation of peptidyl-lysine acetylation
7	GO:0002443	4/65	113/13778	7.50	1.98E-3	4.44E-2	leukocyte mediated immunity
7	GO:0032970	5/65	190/13778	5.58	2.00E-3	4.44E-2	regulation of actin filament-based process
7	GO:0034097	8/65	490/13778	3.46	2.06E-3	4.52E-2	response to cytokine stimulus
7	GO:0014070	9/65	608/13778	3.14	2.10E-3	4.56E-2	response to organic cyclic compound
7	GO:0046660	4/65	118/13778	7.19	2.31E-3	4.61E-2	female sex differentiation
7	GO:0050871	3/65	56/13778	11.36	2.32E-3	4.61E-2	positive regulation of B cell activation
7	GO:0032943	3/65	56/13778	11.36	2.32E-3	4.61E-2	mononuclear cell proliferation
7	GO:0045136	2/65	15/13778	28.26	2.21E-3	4.61E-2	development of secondary sexual characteristics
7	GO:0002252	6/65	288/13778	4.42	2.33E-3	4.61E-2	immune effector process
7	GO:0002250	4/65	117/13778	7.25	2.24E-3	4.61E-2	adaptive immune response
7	GO:0032816	2/65	15/13778	28.26	2.21E-3	4.61E-2	positive regulation of natural killer cell activation
7	GO:0043277	2/65	15/13778	28.26	2.21E-3	4.61E-2	apoptotic cell clearance
7	GO:0006672	3/65	56/13778	11.36	2.32E-3	4.61E-2	ceramide metabolic process
7	GO:0035304	2/65	16/13778	26.50	2.52E-3	4.76E-2	regulation of protein dephosphorylation
7	GO:0043011	2/65	16/13778	26.50	2.52E-3	4.76E-2	myeloid dendritic cell differentiation
7	GO:0006796	20/65	2228/13778	1.90	2.45E-3	4.76E-2	phosphate-containing compound metabolic process
7	GO:0042100	2/65	16/13778	26.50	2.52E-3	4.76E-2	B cell proliferation
7	GO:0046514	2/65	16/13778	26.50	2.52E-3	4.76E-2	ceramide catabolic process
7	GO:0051246	15/65	1451/13778	2.19	2.61E-3	4.88E-2	regulation of protein metabolic process
7	GO:0044699	46/65	7311/13778	1.33	2.68E-3	4.97E-2	single-organism process
8	GO:0007399	26/70	1676/13778	3.05	7.03E-8	1.20E-4	nervous system development
8	GO:0045664	11/70	330/13778	6.56	7.72E-7	4.38E-4	regulation of neuron differentiation
8	GO:0050767	12/70	396/13778	5.96	6.35E-7	4.38E-4	regulation of neurogenesis
8	GO:0051960	12/70	439/13778	5.38	1.88E-6	7.98E-4	regulation of nervous system development
8	GO:0060359	5/70	52/13778	18.93	6.32E-6	1.61E-3	response to ammonium ion
8	GO:0060284	12/70	492/13778	4.80	6.07E-6	1.61E-3	regulation of cell development
8	GO:0022603	13/70	586/13778	4.37	6.64E-6	1.61E-3	regulation of anatomical structure morphogenesis
8	GO:0044699	55/70	7311/13778	1.48	8.41E-6	1.79E-3	single-organism process
8	GO:0050793	20/70	1395/13778	2.82	1.27E-5	2.40E-3	regulation of developmental process
8	GO:0048699	17/70	1057/13778	3.17	1.56E-5	2.65E-3	generation of neurons
8	GO:2000026	17/70	1081/13778	3.10	2.09E-5	3.23E-3	regulation of multicellular organismal development
8	GO:0007158	3/70	12/13778	49.21	2.67E-5	3.79E-3	neuron cell-cell adhesion
8	GO:0022008	17/70	1124/13778	2.98	3.44E-5	4.51E-3	neurogenesis
8	GO:0044708	9/70	335/13778	5.29	4.70E-5	5.71E-3	single-organism behavior
8	GO:0030204	4/70	48/13778	16.40	1.00E-4	9.77E-3	chondroitin sulfate metabolic process
8	GO:0050654	4/70	50/13778	15.75	1.18E-4	9.77E-3	chondroitin sulfate proteoglycan metabolic process
8	GO:0003008	20/70	1630/13778	2.42	1.19E-4	9.77E-3	system process
8	GO:0030154	25/70	2338/13778	2.10	1.21E-4	9.77E-3	cell differentiation
8	GO:0051239	21/70	1744/13778	2.37	9.97E-5	9.77E-3	regulation of multicellular organismal process
8	GO:0019226	12/70	667/13778	3.54	1.21E-4	9.77E-3	transmission of nerve impulse
8	GO:0048731	31/70	3248/13778	1.88	1.06E-4	9.77E-3	system development
8	GO:0050877	17/70	1258/13778	2.66	1.41E-4	1.09E-2	neurological system process
8	GO:0035637	12/70	683/13778	3.46	1.51E-4	1.12E-2	multicellular organismal signaling
8	GO:0007610	9/70	405/13778	4.37	1.99E-4	1.41E-2	behavior
8	GO:0048869	25/70	2424/13778	2.03	2.18E-4	1.48E-2	cellular developmental process
8	GO:0042220	3/70	26/13778	22.71	3.00E-4	1.85E-2	response to cocaine
8	GO:0032502	35/70	4112/13778	1.68	3.08E-4	1.85E-2	developmental process
8	GO:0010001	5/70	117/13778	8.41	3.16E-4	1.85E-2	glial cell differentiation
8	GO:0044707	41/70	5181/13778	1.56	2.88E-4	1.85E-2	single-multicellular organism process
8	GO:0032501	41/70	5214/13778	1.55	3.37E-4	1.91E-2	multicellular organismal process
8	GO:0048856	32/70	3650/13778	1.73	4.05E-4	2.22E-2	anatomical structure development
8	GO:0030203	5/70	135/13778	7.29	6.09E-4	2.73E-2	glycosaminoglycan metabolic process
8	GO:0023052	35/70	4245/13778	1.62	5.98E-4	2.73E-2	signaling
8	GO:0007417	11/70	675/13778	3.21	5.55E-4	2.73E-2	central nervous system development
8	GO:0051969	6/70	205/13778	5.76	5.99E-4	2.73E-2	regulation of transmission of nerve impulse
8	GO:0044700	35/70	4245/13778	1.62	5.98E-4	2.73E-2	single organism signaling
8	GO:0042063	5/70	133/13778	7.40	5.69E-4	2.73E-2	gliogenesis
8	GO:0003188	2/70	7/13778	56.24	5.26E-4	2.73E-2	heart valve formation
8	GO:0043279	4/70	77/13778	10.22	6.25E-4	2.73E-2	response to alkaloid
8	GO:0006029	4/70	78/13778	10.09	6.57E-4	2.79E-2	proteoglycan metabolic process
8	GO:0006208	2/70	8/13778	49.21	6.99E-4	2.81E-2	pyrimidine nucleobase catabolic process
8	GO:0045444	4/70	80/13778	9.84	7.22E-4	2.81E-2	fat cell differentiation
8	GO:0007275	32/70	3754/13778	1.68	6.92E-4	2.81E-2	multicellular organismal development
8	GO:0007626	5/70	141/13778	6.98	7.42E-4	2.81E-2	locomotory behavior
8	GO:0007612	4/70	81/13778	9.72	7.57E-4	2.81E-2	learning
8	GO:0010243	10/70	591/13778	3.33	7.60E-4	2.81E-2	response to organic nitrogen
8	GO:0006022	5/70	143/13778	6.88	7.91E-4	2.86E-2	aminoglycan metabolic process
8	GO:0022604	7/70	301/13778	4.58	8.18E-4	2.90E-2	regulation of cell morphogenesis
8	GO:0031644	6/70	219/13778	5.39	8.46E-4	2.94E-2	regulation of neurological system process
8	GO:0006024	4/70	85/13778	9.26	9.07E-4	3.09E-2	glycosaminoglycan biosynthetic process
8	GO:0006023	4/70	86/13778	9.15	9.48E-4	3.10E-2	aminoglycan biosynthetic process
8	GO:0035019	3/70	38/13778	15.54	9.33E-4	3.10E-2	somatic stem cell maintenance
8	GO:0007154	35/70	4349/13778	1.58	9.77E-4	3.14E-2	cell communication
8	GO:1901565	12/70	843/13778	2.80	1.01E-3	3.18E-2	organonitrogen compound catabolic process
8	GO:0046113	2/70	10/13778	39.37	1.12E-3	3.45E-2	nucleobase catabolic process
8	GO:0045595	13/70	979/13778	2.61	1.16E-3	3.52E-2	regulation of cell differentiation
8	GO:0030208	2/70	11/13778	35.79	1.36E-3	3.68E-2	dermatan sulfate biosynthetic process
8	GO:0030205	2/70	11/13778	35.79	1.36E-3	3.68E-2	dermatan sulfate metabolic process
8	GO:0051093	9/70	524/13778	3.38	1.28E-3	3.68E-2	negative regulation of developmental process
8	GO:0016337	7/70	327/13778	4.21	1.32E-3	3.68E-2	cell-cell adhesion
8	GO:0051957	2/70	11/13778	35.79	1.36E-3	3.68E-2	positive regulation of amino acid transport
8	GO:0007155	11/70	751/13778	2.88	1.33E-3	3.68E-2	cell adhesion
8	GO:0022610	11/70	753/13778	2.88	1.36E-3	3.68E-2	biological adhesion
8	GO:0050651	2/70	12/13778	32.80	1.63E-3	4.25E-2	dermatan sulfate proteoglycan biosynthetic process
8	GO:0050655	2/70	12/13778	32.80	1.63E-3	4.25E-2	dermatan sulfate proteoglycan metabolic process
8	GO:0065008	22/70	2313/13778	1.87	1.85E-3	4.76E-2	regulation of biological quality
8	GO:0030207	2/70	13/13778	30.28	1.91E-3	4.86E-2	chondroitin sulfate catabolic process
8	GO:0051094	10/70	671/13778	2.93	1.98E-3	4.95E-2	positive regulation of developmental process
9	GO:0019080	47/54	83/13778	144.48	5.73E-104	0.00E0	viral genome expression
9	GO:0019083	47/54	83/13778	144.48	5.73E-104	0.00E0	viral transcription
9	GO:0006415	47/54	88/13778	136.27	2.99E-102	7.00E-100	translational termination
9	GO:0006414	49/54	112/13778	111.63	5.08E-102	8.00E-100	translational elongation
9	GO:0043624	47/54	102/13778	117.57	4.05E-98	5.31E-96	cellular protein complex disassembly
9	GO:0043241	47/54	104/13778	115.31	1.36E-97	1.48E-95	protein complex disassembly
9	GO:0000184	48/54	118/13778	103.79	2.22E-97	2.01E-95	nuclear-transcribed mRNA catabolic process, nonsense-mediated decay
9	GO:0006614	47/54	105/13778	114.21	2.46E-97	2.01E-95	SRP-dependent cotranslational protein targeting to membrane
9	GO:0072599	47/54	106/13778	113.13	4.42E-97	2.89E-95	establishment of protein localization to endoplasmic reticulum
9	GO:0045047	47/54	106/13778	113.13	4.42E-97	2.89E-95	protein targeting to ER
9	GO:0006613	47/54	107/13778	112.07	7.87E-97	4.69E-95	cotranslational protein targeting to membrane
9	GO:0006413	49/54	140/13778	89.30	5.02E-96	2.74E-94	translational initiation
9	GO:0019058	47/54	117/13778	102.50	1.76E-94	8.87E-93	viral infectious cycle
9	GO:0070972	47/54	119/13778	100.77	4.83E-94	2.26E-92	protein localization to endoplasmic reticulum
9	GO:0032984	47/54	124/13778	96.71	5.49E-93	2.40E-91	macromolecular complex disassembly
9	GO:0006612	47/54	142/13778	84.45	1.37E-89	5.60E-88	protein targeting to membrane
9	GO:0000956	48/54	164/13778	74.68	5.39E-89	2.08E-87	nuclear-transcribed mRNA catabolic process
9	GO:0006402	48/54	172/13778	71.20	7.85E-88	2.86E-86	mRNA catabolic process
9	GO:0006401	48/54	198/13778	61.85	1.90E-84	6.55E-83	RNA catabolic process
9	GO:0072594	47/54	199/13778	60.26	1.53E-81	5.02E-80	establishment of protein localization to organelle
9	GO:0022411	47/54	233/13778	51.47	6.33E-78	1.97E-76	cellular component disassembly
9	GO:0006605	47/54	344/13778	34.86	2.90E-69	8.65E-68	protein targeting
9	GO:0006412	52/54	654/13778	20.29	2.67E-67	7.61E-66	translation
9	GO:0033365	47/54	380/13778	31.56	4.25E-67	1.16E-65	protein localization to organelle
9	GO:0022415	48/54	450/13778	27.22	8.24E-66	2.16E-64	viral reproductive process
9	GO:0048610	47/54	432/13778	27.76	2.49E-64	6.27E-63	cellular process involved in reproduction
9	GO:0016071	48/54	557/13778	21.99	3.68E-61	8.93E-60	mRNA metabolic process
9	GO:0006886	47/54	539/13778	22.25	1.32E-59	3.08E-58	intracellular protein transport
9	GO:0044265	48/54	612/13778	20.01	4.00E-59	9.03E-58	cellular macromolecule catabolic process
9	GO:0044703	48/54	623/13778	19.66	9.68E-59	2.11E-57	multi-organism reproductive process
9	GO:0016032	48/54	624/13778	19.63	1.05E-58	2.21E-57	viral reproduction
9	GO:0009057	48/54	739/13778	16.57	4.49E-55	9.19E-54	macromolecule catabolic process
9	GO:0071822	47/54	695/13778	17.25	3.01E-54	5.98E-53	protein complex subunit organization
9	GO:0034613	47/54	775/13778	15.47	5.72E-52	1.10E-50	cellular protein localization
9	GO:0070727	47/54	779/13778	15.39	7.33E-52	1.37E-50	cellular macromolecule localization
9	GO:0034655	48/54	864/13778	14.17	9.67E-52	1.76E-50	nucleobase-containing compound catabolic process
9	GO:0046700	48/54	904/13778	13.55	8.85E-51	1.57E-49	heterocycle catabolic process
9	GO:0044270	48/54	906/13778	13.52	9.86E-51	1.70E-49	cellular nitrogen compound catabolic process
9	GO:0019439	48/54	907/13778	13.50	1.04E-50	1.75E-49	aromatic compound catabolic process
9	GO:1901361	48/54	936/13778	13.08	4.84E-50	7.93E-49	organic cyclic compound catabolic process
9	GO:0015031	48/54	977/13778	12.54	3.92E-49	6.26E-48	protein transport
9	GO:0045184	48/54	999/13778	12.26	1.16E-48	1.81E-47	establishment of protein localization
9	GO:0044702	48/54	1007/13778	12.16	1.71E-48	2.61E-47	single organism reproductive process
9	GO:0046907	47/54	932/13778	12.87	3.91E-48	5.83E-47	intracellular transport
9	GO:0043933	47/54	965/13778	12.43	2.06E-47	2.99E-46	macromolecular complex subunit organization
9	GO:0008104	48/54	1272/13778	9.63	1.43E-43	2.03E-42	protein localization
9	GO:0022414	49/54	1411/13778	8.86	2.85E-43	3.98E-42	reproductive process
9	GO:0051649	48/54	1291/13778	9.49	2.92E-43	3.98E-42	establishment of localization in cell
9	GO:0000003	49/54	1418/13778	8.82	3.64E-43	4.87E-42	reproduction
9	GO:0051641	48/54	1514/13778	8.09	6.28E-40	8.23E-39	cellular localization
9	GO:0033036	48/54	1535/13778	7.98	1.22E-39	1.56E-38	macromolecule localization
9	GO:0071702	48/54	1556/13778	7.87	2.34E-39	2.94E-38	organic substance transport
9	GO:0044248	48/54	1647/13778	7.44	3.56E-38	4.41E-37	cellular catabolic process
9	GO:1901575	48/54	1791/13778	6.84	1.96E-36	2.38E-35	organic substance catabolic process
9	GO:0009056	48/54	1909/13778	6.42	4.13E-35	4.91E-34	catabolic process
9	GO:0034645	53/54	2973/13778	4.55	1.49E-34	1.75E-33	cellular macromolecule biosynthetic process
9	GO:0044267	52/54	2756/13778	4.81	2.87E-34	3.30E-33	cellular protein metabolic process
9	GO:0009059	53/54	3020/13778	4.48	3.44E-34	3.88E-33	macromolecule biosynthetic process
9	GO:0032774	48/54	2241/13778	5.47	8.40E-32	9.33E-31	RNA biosynthetic process
9	GO:0010467	53/54	3361/13778	4.02	1.01E-31	1.11E-30	gene expression
9	GO:0019538	52/54	3240/13778	4.09	1.27E-30	1.37E-29	protein metabolic process
9	GO:0034654	48/54	2458/13778	4.98	6.64E-30	7.02E-29	nucleobase-containing compound biosynthetic process
9	GO:0019438	48/54	2514/13778	4.87	1.92E-29	2.00E-28	aromatic compound biosynthetic process
9	GO:0018130	48/54	2524/13778	4.85	2.32E-29	2.37E-28	heterocycle biosynthetic process
9	GO:0044249	53/54	3740/13778	3.62	2.93E-29	2.96E-28	cellular biosynthetic process
9	GO:1901576	53/54	3808/13778	3.55	7.63E-29	7.51E-28	organic substance biosynthetic process
9	GO:0044271	48/54	2589/13778	4.73	7.68E-29	7.51E-28	cellular nitrogen compound biosynthetic process
9	GO:1901362	48/54	2617/13778	4.68	1.27E-28	1.23E-27	organic cyclic compound biosynthetic process
9	GO:0009058	53/54	3867/13778	3.50	1.72E-28	1.63E-27	biosynthetic process
9	GO:0016070	49/54	2849/13778	4.39	2.15E-28	2.01E-27	RNA metabolic process
9	GO:0006810	48/54	2991/13778	4.09	6.72E-26	6.20E-25	transport
9	GO:0051234	48/54	3041/13778	4.03	1.46E-25	1.33E-24	establishment of localization
9	GO:0090304	49/54	3412/13778	3.66	1.22E-24	1.10E-23	nucleic acid metabolic process
9	GO:0042274	11/54	19/13778	147.72	8.34E-23	7.38E-22	ribosomal small subunit biogenesis
9	GO:0051179	48/54	3686/13778	3.32	1.11E-21	9.69E-21	localization
9	GO:0016043	47/54	3539/13778	3.39	3.42E-21	2.95E-20	cellular component organization
9	GO:0006139	49/54	4147/13778	3.01	1.29E-20	1.10E-19	nucleobase-containing compound metabolic process
9	GO:0071840	47/54	3650/13778	3.29	1.37E-20	1.15E-19	cellular component organization or biogenesis
9	GO:0044260	53/54	5573/13778	2.43	4.13E-20	3.42E-19	cellular macromolecule metabolic process
9	GO:0046483	49/54	4293/13778	2.91	6.60E-20	5.40E-19	heterocycle metabolic process
9	GO:0006725	49/54	4304/13778	2.90	7.44E-20	6.02E-19	cellular aromatic compound metabolic process
9	GO:0051704	49/54	4316/13778	2.90	8.49E-20	6.78E-19	multi-organism process
9	GO:1901360	49/54	4488/13778	2.79	5.32E-19	4.20E-18	organic cyclic compound metabolic process
9	GO:0034641	49/54	4508/13778	2.77	6.56E-19	5.11E-18	cellular nitrogen compound metabolic process
9	GO:0043170	53/54	6078/13778	2.22	3.93E-18	3.03E-17	macromolecule metabolic process
9	GO:0042254	15/54	143/13778	26.76	5.06E-18	3.85E-17	ribosome biogenesis
9	GO:0006807	49/54	4871/13778	2.57	2.45E-17	1.85E-16	nitrogen compound metabolic process
9	GO:0022613	15/54	216/13778	17.72	2.63E-15	1.96E-14	ribonucleoprotein complex biogenesis
9	GO:0006364	12/54	102/13778	30.02	3.70E-15	2.72E-14	rRNA processing
9	GO:0016072	12/54	105/13778	29.16	5.29E-15	3.85E-14	rRNA metabolic process
9	GO:0044237	53/54	7521/13778	1.80	2.69E-13	1.94E-12	cellular metabolic process
9	GO:0044238	53/54	7579/13778	1.78	4.02E-13	2.86E-12	primary metabolic process
9	GO:0071704	53/54	7769/13778	1.74	1.45E-12	1.02E-11	organic substance metabolic process
9	GO:0044710	53/54	8050/13778	1.68	9.19E-12	6.40E-11	single-organism metabolic process
9	GO:0034470	12/54	201/13778	15.23	1.34E-11	9.25E-11	ncRNA processing
9	GO:0044699	51/54	7311/13778	1.78	2.35E-11	1.60E-10	single-organism process
9	GO:0008152	53/54	8568/13778	1.58	2.31E-10	1.56E-9	metabolic process
9	GO:0034660	12/54	277/13778	11.05	5.56E-10	3.72E-9	ncRNA metabolic process
9	GO:0000028	3/54	5/13778	153.09	5.66E-7	3.74E-6	ribosomal small subunit assembly
9	GO:0030490	3/54	7/13778	109.35	1.97E-6	1.29E-5	maturation of SSU-rRNA
9	GO:0006396	12/54	594/13778	5.15	2.40E-6	1.56E-5	RNA processing
9	GO:0042255	3/54	15/13778	51.03	2.50E-5	1.61E-4	ribosome assembly
9	GO:0000462	2/54	6/13778	85.05	2.24E-4	1.42E-3	maturation of SSU-rRNA from tricistronic rRNA transcript (SSU-rRNA, 5.8S rRNA, LSU-rRNA)
9	GO:0044085	15/54	1413/13778	2.71	2.46E-4	1.55E-3	cellular component biogenesis
9	GO:0006417	6/54	229/13778	6.69	2.62E-4	1.63E-3	regulation of translation
9	GO:0009987	54/54	11994/13778	1.15	5.51E-4	3.41E-3	cellular process
9	GO:0042273	2/54	11/13778	46.39	8.11E-4	4.96E-3	ribosomal large subunit biogenesis
9	GO:0034101	3/54	70/13778	10.93	2.59E-3	1.57E-2	erythrocyte homeostasis
9	GO:0010608	6/54	381/13778	4.02	3.62E-3	2.18E-2	posttranscriptional regulation of gene expression
9	GO:0070925	3/54	88/13778	8.70	4.94E-3	2.94E-2	organelle assembly
9	GO:0022618	3/54	90/13778	8.50	5.26E-3	3.10E-2	ribonucleoprotein complex assembly
9	GO:0071826	3/54	94/13778	8.14	5.93E-3	3.47E-2	ribonucleoprotein complex subunit organization
9	GO:0000461	1/54	2/13778	127.57	7.82E-3	4.50E-2	endonucleolytic cleavage to generate mature 3'-end of SSU-rRNA from (SSU-rRNA, 5.8S rRNA, LSU-rRNA)
9	GO:0000056	1/54	2/13778	127.57	7.82E-3	4.50E-2	ribosomal small subunit export from nucleus
10	GO:0016070	64/133	2849/13778	2.33	1.25E-12	1.97E-9	RNA metabolic process
10	GO:0090304	69/133	3412/13778	2.09	1.39E-11	1.09E-8	nucleic acid metabolic process
10	GO:0010467	68/133	3361/13778	2.10	2.24E-11	1.17E-8	gene expression
10	GO:0006351	51/133	2156/13778	2.45	1.59E-10	5.95E-8	transcription, DNA-dependent
10	GO:0006139	75/133	4147/13778	1.87	2.27E-10	5.95E-8	nucleobase-containing compound metabolic process
10	GO:0032774	52/133	2241/13778	2.40	1.94E-10	5.95E-8	RNA biosynthetic process
10	GO:0034654	54/133	2458/13778	2.28	5.65E-10	9.87E-8	nucleobase-containing compound biosynthetic process
10	GO:0006725	76/133	4304/13778	1.83	5.03E-10	9.87E-8	cellular aromatic compound metabolic process
10	GO:0046483	76/133	4293/13778	1.83	4.41E-10	9.87E-8	heterocycle metabolic process
10	GO:0019438	54/133	2514/13778	2.23	1.32E-9	2.01E-7	aromatic compound biosynthetic process
10	GO:1901360	77/133	4488/13778	1.78	1.46E-9	2.01E-7	organic cyclic compound metabolic process
10	GO:0018130	54/133	2524/13778	2.22	1.53E-9	2.01E-7	heterocycle biosynthetic process
10	GO:0034641	77/133	4508/13778	1.77	1.83E-9	2.15E-7	cellular nitrogen compound metabolic process
10	GO:1901362	55/133	2617/13778	2.18	1.91E-9	2.15E-7	organic cyclic compound biosynthetic process
10	GO:0044271	54/133	2589/13778	2.16	3.93E-9	4.12E-7	cellular nitrogen compound biosynthetic process
10	GO:0034645	58/133	2973/13778	2.02	9.23E-9	9.07E-7	cellular macromolecule biosynthetic process
10	GO:0044260	86/133	5573/13778	1.60	1.30E-8	1.20E-6	cellular macromolecule metabolic process
10	GO:0009059	58/133	3020/13778	1.99	1.68E-8	1.47E-6	macromolecule biosynthetic process
10	GO:0006807	78/133	4871/13778	1.66	3.23E-8	2.54E-6	nitrogen compound metabolic process
10	GO:0044237	103/133	7521/13778	1.42	3.23E-8	2.54E-6	cellular metabolic process
10	GO:0044710	106/133	8050/13778	1.36	1.50E-7	1.12E-5	single-organism metabolic process
10	GO:0043170	88/133	6078/13778	1.50	2.17E-7	1.55E-5	macromolecule metabolic process
10	GO:2001141	53/133	2896/13778	1.90	5.49E-7	3.75E-5	regulation of RNA biosynthetic process
10	GO:1901576	63/133	3808/13778	1.71	8.95E-7	5.69E-5	organic substance biosynthetic process
10	GO:0006355	52/133	2857/13778	1.89	9.04E-7	5.69E-5	regulation of transcription, DNA-dependent
10	GO:0051252	53/133	2952/13778	1.86	1.03E-6	6.21E-5	regulation of RNA metabolic process
10	GO:0044249	62/133	3740/13778	1.72	1.11E-6	6.45E-5	cellular biosynthetic process
10	GO:0008152	108/133	8568/13778	1.31	1.50E-6	8.40E-5	metabolic process
10	GO:0009058	63/133	3867/13778	1.69	1.59E-6	8.61E-5	biosynthetic process
10	GO:2000112	54/133	3099/13778	1.81	2.00E-6	1.05E-4	regulation of cellular macromolecule biosynthetic process
10	GO:0010556	55/133	3194/13778	1.78	2.20E-6	1.12E-4	regulation of macromolecule biosynthetic process
10	GO:0051171	59/133	3563/13778	1.72	2.67E-6	1.27E-4	regulation of nitrogen compound metabolic process
10	GO:0044238	99/133	7579/13778	1.35	2.65E-6	1.27E-4	primary metabolic process
10	GO:0010468	56/133	3308/13778	1.75	2.90E-6	1.30E-4	regulation of gene expression
10	GO:0019219	58/133	3481/13778	1.73	2.85E-6	1.30E-4	regulation of nucleobase-containing compound metabolic process
10	GO:0031326	55/133	3321/13778	1.72	7.71E-6	3.37E-4	regulation of cellular biosynthetic process
10	GO:0009889	55/133	3348/13778	1.70	9.94E-6	4.22E-4	regulation of biosynthetic process
10	GO:0071704	99/133	7769/13778	1.32	1.12E-5	4.65E-4	organic substance metabolic process
10	GO:0060255	62/133	4129/13778	1.56	3.57E-5	1.44E-3	regulation of macromolecule metabolic process
10	GO:0016071	16/133	557/13778	2.98	9.19E-5	3.53E-3	mRNA metabolic process
10	GO:0031323	64/133	4439/13778	1.49	9.15E-5	3.53E-3	regulation of cellular metabolic process
10	GO:0019222	70/133	5068/13778	1.43	1.31E-4	4.90E-3	regulation of metabolic process
10	GO:0006397	12/133	359/13778	3.46	1.85E-4	6.75E-3	mRNA processing
10	GO:0080090	62/133	4378/13778	1.47	2.32E-4	8.28E-3	regulation of primary metabolic process
10	GO:0032480	4/133	33/13778	12.56	2.73E-4	9.55E-3	negative regulation of type I interferon production
10	GO:0022904	6/133	94/13778	6.61	2.94E-4	1.00E-2	respiratory electron transport chain
10	GO:0000398	8/133	186/13778	4.46	4.42E-4	1.45E-2	mRNA splicing, via spliceosome
10	GO:0000377	8/133	186/13778	4.46	4.42E-4	1.45E-2	RNA splicing, via transesterification reactions with bulged adenosine as nucleophile
10	GO:0000375	8/133	191/13778	4.34	5.27E-4	1.69E-2	RNA splicing, via transesterification reactions
10	GO:0006396	15/133	594/13778	2.62	6.08E-4	1.91E-2	RNA processing
10	GO:0016032	15/133	624/13778	2.49	1.00E-3	3.09E-2	viral reproduction
10	GO:0022900	6/133	128/13778	4.86	1.50E-3	4.53E-2	electron transport chain
11	GO:0006259	35/58	757/13778	10.98	9.76E-30	9.16E-27	DNA metabolic process
11	GO:0022403	32/58	710/13778	10.71	1.93E-26	6.18E-24	cell cycle phase
11	GO:0000278	31/58	641/13778	11.49	1.98E-26	6.18E-24	mitotic cell cycle
11	GO:0022402	33/58	851/13778	9.21	2.72E-25	6.37E-23	cell cycle process
11	GO:0007049	35/58	1115/13778	7.46	5.23E-24	9.80E-22	cell cycle
11	GO:0006271	13/58	35/13778	88.23	4.23E-23	6.62E-21	DNA strand elongation involved in DNA replication
11	GO:0006260	20/58	197/13778	24.12	5.51E-23	7.38E-21	DNA replication
11	GO:0022616	13/58	37/13778	83.46	1.01E-22	1.19E-20	DNA strand elongation
11	GO:0006261	14/58	79/13778	42.10	1.03E-19	1.07E-17	DNA-dependent DNA replication
11	GO:0000084	15/58	116/13778	30.72	6.55E-19	6.14E-17	S phase of mitotic cell cycle
11	GO:0051320	15/58	126/13778	28.28	2.38E-18	2.03E-16	S phase
11	GO:0006974	23/58	559/13778	9.77	1.46E-17	1.14E-15	response to DNA damage stimulus
11	GO:0000075	17/58	236/13778	17.11	5.59E-17	4.03E-15	cell cycle checkpoint
11	GO:0006270	9/58	23/13778	92.96	1.69E-16	1.13E-14	DNA replication initiation
11	GO:0006310	15/58	169/13778	21.08	2.15E-16	1.34E-14	DNA recombination
11	GO:0006281	19/58	368/13778	12.26	2.95E-16	1.63E-14	DNA repair
11	GO:0071156	17/58	260/13778	15.53	2.86E-16	1.63E-14	regulation of cell cycle arrest
11	GO:0051276	23/58	671/13778	8.14	7.91E-16	4.12E-14	chromosome organization
11	GO:0051329	18/58	331/13778	12.92	8.45E-16	4.17E-14	interphase of mitotic cell cycle
11	GO:0051325	18/58	343/13778	12.47	1.58E-15	7.39E-14	interphase
11	GO:0032201	8/58	22/13778	86.38	1.82E-14	8.14E-13	telomere maintenance via semi-conservative replication
11	GO:0000216	11/58	79/13778	33.08	1.96E-14	8.36E-13	M/G1 transition of mitotic cell cycle
11	GO:0090304	42/58	3412/13778	2.92	2.88E-14	1.17E-12	nucleic acid metabolic process
11	GO:0000722	8/58	25/13778	76.02	6.10E-14	2.39E-12	telomere maintenance via recombination
11	GO:0010564	18/58	425/13778	10.06	6.48E-14	2.43E-12	regulation of cell cycle process
11	GO:0006139	45/58	4147/13778	2.58	1.03E-13	3.71E-12	nucleobase-containing compound metabolic process
11	GO:0046483	45/58	4293/13778	2.49	4.06E-13	1.41E-11	heterocycle metabolic process
11	GO:0006725	45/58	4304/13778	2.48	4.49E-13	1.45E-11	cellular aromatic compound metabolic process
11	GO:0006312	8/58	31/13778	61.30	4.37E-13	1.45E-11	mitotic recombination
11	GO:0006996	31/58	1861/13778	3.96	5.69E-13	1.78E-11	organelle organization
11	GO:0010833	8/58	35/13778	54.30	1.29E-12	3.89E-11	telomere maintenance via telomere lengthening
11	GO:1901360	45/58	4488/13778	2.38	2.33E-12	6.83E-11	organic cyclic compound metabolic process
11	GO:0034641	45/58	4508/13778	2.37	2.77E-12	7.88E-11	cellular nitrogen compound metabolic process
11	GO:0000082	12/58	166/13778	17.17	3.46E-12	9.55E-11	G1/S transition of mitotic cell cycle
11	GO:0071103	13/58	215/13778	14.36	3.85E-12	1.03E-10	DNA conformation change
11	GO:0051301	16/58	402/13778	9.45	5.35E-12	1.39E-10	cell division
11	GO:0033554	23/58	1042/13778	5.24	8.67E-12	2.20E-10	cellular response to stress
11	GO:0000279	16/58	447/13778	8.50	2.64E-11	6.51E-10	M phase
11	GO:0006807	45/58	4871/13778	2.19	5.58E-11	1.34E-9	nitrogen compound metabolic process
11	GO:0000723	8/58	66/13778	28.79	2.84E-10	6.66E-9	telomere maintenance
11	GO:0032200	8/58	67/13778	28.36	3.21E-10	7.25E-9	telomere organization
11	GO:0007067	13/58	307/13778	10.06	3.33E-10	7.25E-9	mitosis
11	GO:0000280	13/58	307/13778	10.06	3.33E-10	7.25E-9	nuclear division
11	GO:0000087	13/58	313/13778	9.87	4.22E-10	9.00E-9	M phase of mitotic cell cycle
11	GO:0051726	18/58	732/13778	5.84	5.60E-10	1.17E-8	regulation of cell cycle
11	GO:0048285	13/58	329/13778	9.39	7.78E-10	1.59E-8	organelle fission
11	GO:0006323	10/58	160/13778	14.85	1.09E-9	2.17E-8	DNA packaging
11	GO:0006297	5/58	19/13778	62.51	1.23E-8	2.41E-7	nucleotide-excision repair, DNA gap filling
11	GO:0006268	4/58	9/13778	105.58	3.51E-8	6.71E-7	DNA unwinding involved in replication
11	GO:0007059	8/58	126/13778	15.08	5.11E-8	9.59E-7	chromosome segregation
11	GO:0030261	5/58	31/13778	38.31	1.73E-7	3.19E-6	chromosome condensation
11	GO:0044260	43/58	5573/13778	1.83	1.91E-7	3.44E-6	cellular macromolecule metabolic process
11	GO:0007076	4/58	13/13778	73.09	1.96E-7	3.48E-6	mitotic chromosome condensation
11	GO:0071840	34/58	3650/13778	2.21	2.39E-7	4.15E-6	cellular component organization or biogenesis
11	GO:0060249	8/58	164/13778	11.59	3.93E-7	6.70E-6	anatomical structure homeostasis
11	GO:0016043	33/58	3539/13778	2.22	4.33E-7	7.25E-6	cellular component organization
11	GO:0006283	5/58	46/13778	25.82	1.33E-6	2.19E-5	transcription-coupled nucleotide-excision repair
11	GO:0000070	5/58	47/13778	25.27	1.49E-6	2.40E-5	mitotic sister chromatid segregation
11	GO:0000819	5/58	50/13778	23.76	2.03E-6	3.23E-5	sister chromatid segregation
11	GO:0043170	43/58	6078/13778	1.68	3.25E-6	5.08E-5	macromolecule metabolic process
11	GO:0006273	3/58	8/13778	89.08	3.91E-6	6.01E-5	lagging strand elongation
11	GO:0009314	9/58	315/13778	6.79	6.05E-6	9.16E-5	response to radiation
11	GO:0006289	5/58	75/13778	15.84	1.53E-5	2.28E-4	nucleotide-excision repair
11	GO:0006301	3/58	14/13778	50.90	2.49E-5	3.65E-4	postreplication repair
11	GO:0006284	4/58	42/13778	22.62	2.81E-5	4.05E-4	base-excision repair
11	GO:0006302	5/58	90/13778	13.20	3.71E-5	5.27E-4	double-strand break repair
11	GO:0051704	33/58	4316/13778	1.82	4.80E-5	6.72E-4	multi-organism process
11	GO:0071897	3/58	18/13778	39.59	5.52E-5	7.62E-4	DNA biosynthetic process
11	GO:0032508	4/58	50/13778	19.00	5.64E-5	7.66E-4	DNA duplex unwinding
11	GO:0032392	4/58	52/13778	18.27	6.58E-5	8.82E-4	DNA geometric change
11	GO:0044237	46/58	7521/13778	1.45	7.60E-5	1.00E-3	cellular metabolic process
11	GO:0006950	24/58	2643/13778	2.16	7.95E-5	1.04E-3	response to stress
11	GO:0006298	3/58	21/13778	33.94	8.92E-5	1.15E-3	mismatch repair
11	GO:0044238	46/58	7579/13778	1.44	9.76E-5	1.24E-3	primary metabolic process
11	GO:0000710	2/58	4/13778	118.78	1.04E-4	1.30E-3	meiotic mismatch repair
11	GO:0010212	5/58	115/13778	10.33	1.20E-4	1.48E-3	response to ionizing radiation
11	GO:0006269	2/58	5/13778	95.02	1.73E-4	2.08E-3	DNA replication, synthesis of RNA primer
11	GO:0051096	2/58	5/13778	95.02	1.73E-4	2.08E-3	positive regulation of helicase activity
11	GO:0034645	25/58	2973/13778	2.00	1.88E-4	2.23E-3	cellular macromolecule biosynthetic process
11	GO:0051052	6/58	202/13778	7.06	1.98E-4	2.32E-3	regulation of DNA metabolic process
11	GO:0071704	46/58	7769/13778	1.41	2.15E-4	2.49E-3	organic substance metabolic process
11	GO:0009059	25/58	3020/13778	1.97	2.43E-4	2.77E-3	macromolecule biosynthetic process
11	GO:0000077	5/58	134/13778	8.86	2.45E-4	2.77E-3	DNA damage checkpoint
11	GO:0051103	2/58	6/13778	79.18	2.58E-4	2.89E-3	DNA ligation involved in DNA repair
11	GO:0031570	5/58	141/13778	8.42	3.10E-4	3.42E-3	DNA integrity checkpoint
11	GO:0016444	3/58	32/13778	22.27	3.22E-4	3.47E-3	somatic cell DNA recombination
11	GO:0002562	3/58	32/13778	22.27	3.22E-4	3.47E-3	somatic diversification of immune receptors via germline recombination within a single locus
11	GO:0007289	2/58	7/13778	67.87	3.61E-4	3.85E-3	spermatid nucleus differentiation
11	GO:0000236	4/58	85/13778	11.18	4.44E-4	4.68E-3	mitotic prometaphase
11	GO:0051095	2/58	8/13778	59.39	4.80E-4	5.00E-3	regulation of helicase activity
11	GO:0002200	3/58	37/13778	19.26	4.97E-4	5.12E-3	somatic diversification of immune receptors
11	GO:0000731	2/58	9/13778	52.79	6.15E-4	6.27E-3	DNA synthesis involved in DNA repair
11	GO:0044710	46/58	8050/13778	1.36	6.48E-4	6.54E-3	single-organism metabolic process
11	GO:0009411	4/58	95/13778	10.00	6.77E-4	6.75E-3	response to UV
11	GO:0006266	2/58	10/13778	47.51	7.67E-4	7.42E-3	DNA ligation
11	GO:0016446	2/58	10/13778	47.51	7.67E-4	7.42E-3	somatic hypermutation of immunoglobulin genes
11	GO:0002566	2/58	10/13778	47.51	7.67E-4	7.42E-3	somatic diversification of immune receptors via somatic mutation
11	GO:0008630	3/58	45/13778	15.84	8.86E-4	8.48E-3	intrinsic apoptotic signaling pathway in response to DNA damage response
11	GO:0045910	2/58	12/13778	39.59	1.12E-3	1.05E-2	negative regulation of DNA recombination
11	GO:0008340	2/58	12/13778	39.59	1.12E-3	1.05E-2	determination of adult lifespan
11	GO:0044249	27/58	3740/13778	1.71	1.19E-3	1.10E-2	cellular biosynthetic process
11	GO:0006282	3/58	50/13778	14.25	1.21E-3	1.11E-2	regulation of DNA repair
11	GO:0006325	8/58	509/13778	3.73	1.24E-3	1.13E-2	chromatin organization
11	GO:0009628	10/58	786/13778	3.02	1.48E-3	1.34E-2	response to abiotic stimulus
11	GO:0006334	4/58	118/13778	8.05	1.52E-3	1.36E-2	nucleosome assembly
11	GO:1901576	27/58	3808/13778	1.68	1.59E-3	1.39E-2	organic substance biosynthetic process
11	GO:0008152	47/58	8568/13778	1.30	1.58E-3	1.39E-2	metabolic process
11	GO:0031497	4/58	126/13778	7.54	1.93E-3	1.68E-2	chromatin assembly
11	GO:0009058	27/58	3867/13778	1.66	2.03E-3	1.75E-2	biosynthetic process
11	GO:0007281	4/58	129/13778	7.37	2.11E-3	1.78E-2	germ cell development
11	GO:0051321	4/58	129/13778	7.37	2.11E-3	1.78E-2	meiotic cell cycle
11	GO:0048610	7/58	432/13778	3.85	2.15E-3	1.80E-2	cellular process involved in reproduction
11	GO:0045190	2/58	17/13778	27.95	2.27E-3	1.84E-2	isotype switching
11	GO:0015949	2/58	17/13778	27.95	2.27E-3	1.84E-2	nucleobase-containing small molecule interconversion
11	GO:0002208	2/58	17/13778	27.95	2.27E-3	1.84E-2	somatic diversification of immunoglobulins involved in immune response
11	GO:0002204	2/58	17/13778	27.95	2.27E-3	1.84E-2	somatic recombination of immunoglobulin genes involved in immune response
11	GO:0007093	4/58	134/13778	7.09	2.42E-3	1.94E-2	mitotic cell cycle checkpoint
11	GO:0034728	4/58	138/13778	6.89	2.69E-3	2.14E-2	nucleosome organization
11	GO:0065004	4/58	139/13778	6.84	2.76E-3	2.18E-2	protein-DNA complex assembly
11	GO:0007286	3/58	69/13778	10.33	3.05E-3	2.38E-2	spermatid development
11	GO:0006333	4/58	144/13778	6.60	3.14E-3	2.43E-2	chromatin assembly or disassembly
11	GO:0048515	3/58	73/13778	9.76	3.57E-3	2.75E-2	spermatid differentiation
11	GO:0002312	2/58	22/13778	21.60	3.81E-3	2.88E-2	B cell activation involved in immune response
11	GO:0002381	2/58	22/13778	21.60	3.81E-3	2.88E-2	immunoglobulin production involved in immunoglobulin mediated immune response
11	GO:0070510	1/58	1/13778	237.55	4.21E-3	2.95E-2	regulation of histone H4-K20 methylation
11	GO:0070512	1/58	1/13778	237.55	4.21E-3	2.95E-2	positive regulation of histone H4-K20 methylation
11	GO:0006272	1/58	1/13778	237.55	4.21E-3	2.95E-2	leading strand elongation
11	GO:2000620	1/58	1/13778	237.55	4.21E-3	2.95E-2	positive regulation of histone H4-K16 acetylation
11	GO:0016447	2/58	23/13778	20.66	4.16E-3	2.95E-2	somatic recombination of immunoglobulin gene segments
11	GO:2000618	1/58	1/13778	237.55	4.21E-3	2.95E-2	regulation of histone H4-K16 acetylation
11	GO:2000617	1/58	1/13778	237.55	4.21E-3	2.95E-2	positive regulation of histone H3-K9 acetylation
11	GO:0045128	1/58	1/13778	237.55	4.21E-3	2.95E-2	negative regulation of reciprocal meiotic recombination
11	GO:0000083	2/58	23/13778	20.66	4.16E-3	2.95E-2	regulation of transcription involved in G1/S phase of mitotic cell cycle
11	GO:0071824	4/58	154/13778	6.17	3.99E-3	2.95E-2	protein-DNA complex subunit organization
11	GO:0007062	2/58	25/13778	19.00	4.91E-3	3.39E-2	sister chromatid cohesion
11	GO:0010259	2/58	25/13778	19.00	4.91E-3	3.39E-2	multicellular organismal aging
11	GO:2001020	3/58	83/13778	8.59	5.12E-3	3.51E-2	regulation of response to DNA damage stimulus
11	GO:0016445	2/58	29/13778	16.38	6.57E-3	4.40E-2	somatic diversification of immunoglobulins
11	GO:0007098	2/58	29/13778	16.38	6.57E-3	4.40E-2	centrosome cycle
11	GO:0033261	2/58	29/13778	16.38	6.57E-3	4.40E-2	regulation of S phase
11	GO:0097193	3/58	95/13778	7.50	7.45E-3	4.96E-2	intrinsic apoptotic signaling pathway
11	GO:0046654	1/58	2/13778	118.78	8.40E-3	4.99E-2	tetrahydrofolate biosynthetic process
11	GO:0003290	1/58	2/13778	118.78	8.40E-3	4.99E-2	atrial septum secundum morphogenesis
11	GO:0006288	1/58	2/13778	118.78	8.40E-3	4.99E-2	base-excision repair, DNA ligation
11	GO:0046606	1/58	2/13778	118.78	8.40E-3	4.99E-2	negative regulation of centrosome cycle
11	GO:0046600	1/58	2/13778	118.78	8.40E-3	4.99E-2	negative regulation of centriole replication
11	GO:2000615	1/58	2/13778	118.78	8.40E-3	4.99E-2	regulation of histone H3-K9 acetylation
[truncated: 3,304 more rows]
